# Supplementary material for: Deletions across the SARS-CoV-2 Genome: Molecular Mechanisms and Putative Functional Consequences of Deletions in Accessory Genes
Source: MDPI journal article supplement (doi:10.3390/microorganisms11010229), 2023-01-16
Supplement: s1 [file s1]

Supplementary Figure S2. Contexts of long deletions in SARS-CoV-2.  
The 1st number is the position and the 5th number is the number of instances  
followed by gene name.

27923 35 7 10 968 ORF8-ITTVAAFHQECS10fs  
ACTTGTCACGCCTAAACGAACATGAAATTTCTTGTTTTCTTAGGAATCAT  
cac aac tgt agc tgc att tca cca aga atg tag tt  
TACAGTCATGTACTCAACATCAACCATATGTAGTTGATGACCCGTGTCCTA

27406 57 5 5 3365 ORF7a-LFLALITLATCELYHYQEC5del  
TAGATGAAGAGCAACCAATGGAGATTGATTAAACGAACATGAAAATTATT  
ctt ttc ttg gca ctg ata aca ctc gct act tgt gag ctt tat cac tac caa gag tgt  
GTTAGAGGTACAACAGTACTTTTAAAAGAACCTTGCTCTTCTGGAACATAC

29730 37 12 4 76  
TTTAATCAGTGTGTAACATTAGGGAGGACTTGAAAGAGCCACCACATTTT  
cac cga ggc cac gcg gag tac gat cga gtg tac agt g  
AACAATGCTAGGGAGAGCTGCCTATATGGAAGAGCCCTAATGTGTAAAATT

27579 46 12 1 144 ORF7a-QFAFACPDGVKHHVYQL62fs  
TTTCATCCTCTAGCTGATAACAAATTTGCACTGACTTGCTTTAGCACTCA  
att tgc ttt tgc ttg tcc tga cgg cgt aaa aca cgt cta tca gtt a  
CGTGCCAGATCAGTTTCACCTAAACTGTTTCATCAGACAAGAGGAAGTTCAA

27569 55 2 1 90 ORF7a-FSTQFAFACPDGVKHHVYQL59fs  
CAATTCACCATTTCATCCTCTAGCTGATAACAAATTTGCACTGACTTGCT  
tta gca ctc aat ttg ctt ttg ctt gtc ctg acg gcg taa aac acg tct atc agt t  
ACGTGCCAGATCAGTTTCACCTAAACTGTTTCATCAGACAAGAGGAAGTTCA

27555 69 14 1 61 ORF7a-FALTCFSTQFAFACPDGVKHHVYQ54del  
GGAACATACGAGGGCAATTCACCATTTCATCCTCTAGCTGATAACAAATT  
tgc act gac ttg ctt tag cac tca att tgc ttt tgc ttg tcc tga cgg cgt aaa aca cgt cta tca gtt  
ACGTGCCAGATCAGTTTCACCTAAACTGTTTCATCAGACAAGAGGAAGTTCA

29732 35 2 1 33  
TAATCAGTGTGTAACATTAGGGAGGACTTGAAAGAGCCACCACATTTTCA  
ccg agg cca cgc gga gta cga tgc agt gta cag tg  
AACAATGCTAGGGAGAGCTGCCTATATGGAAGAGCCCTAATGTGTAAAATT

29728 49 7 30 204  
TCTTTAATCAGTGTGTAACATTAGGGAGGACTTGAAAGAGCCACCACATT  
ttc acc gag gcc acg cgg agt acg atc gag tgt aca gtg aac aat gct a  
GGGAGAGCTGCCTATATGGAAGAGCCCTAATGTGTAAAATTAATTTTAGTA

27531 152 1 1 15 ORF7a-FHPLADNKFALTCFSTQFAFACPDGVKHHVYQLRARSVSPKLFIRQ  
CTTTTAAAAGAACCTTGCTCTTCTGGAACATACGAGGGCAATTCACCATT  
tca tcc tct agc tga taa caa att tgc act gac ttg ctt tag cac tca att tgc ttt tgc ttg tcc tga cgg cgt aaa aca cgt cta tca gtt acg tgc  
cag atc agt ttc acc taa act gtt cat cag aca aga gga agt tca aga act tt  
ACTCTCCAATTTTCTTATTGTTGCGGCAATAGTGTTTATAACACTTTTGCT

28009 137 3 1 12 ORF8-IHFYSKWYIRVGARKSAPLIELCVDEAGSKSPIQYIDIGNYTVSCL  
ACAGTCATGTACTCAACATCAACCATATGTAGTTGATGACCCGTGTCCTA

ttc act tct att cta aat ggt ata tta gag tag gag cta gaa aat cag cac ctt taa ttg aat tgt gcg tgg atg agg ctg gtt cta aat cac cca  
ttc agt aca tcg ata tcg gta att ata cag ttt cct gtt ta  
CCTTTTACAATTAATTGCCAGGAACCTAAATTGGGTAGTCTTGTAGTGCGT

27686 62 4 1 6 ORF7a-SPIFLIVAAIVFITLCFTLKR98fs  
AGTTTCACCTAAACTGTTTCATCAGACAAGAGGAAGTTCAAGAACTTTACT  
ctc caa ttt ttc tta ttg ttg egg caa tag tgt tta taa cac ttt gct tca cac tca aaa ga  
AAGACAGAATGATTGAACTTTTCATTAATTGACTTCTATTTGTGCTTTTTAG

28004 76 1 1 5 ORF8-CPIHFYSKWYIRVGARKSAPLIELCV37fs  
AGTTTACAGTCATGTACTCAACATCAACCATATGTAGTTGATGACCCGTG  
tcc tat tca ctt cta ttc taa atg gta tat tag agt agg agc tag aaa atc agc acc ttt aat tga att gtg cgt g  
GATGAGGCTGGTTCTAAATCACCCATTCAGTACATCGATATCGGTAATTAT

27673 78 1 0 281 ORF7a-QELYSPIFLIVAAIVFITLCFTLKRK94del  
TACGTGCCAGATCAGTTTTCACCTAAACTGTTTCATCAGACAAGAGGAAGTT  
caa gaa ctt tac tct cca att ttt ctt att gtt gcg gca ata gtg ttt ata aca ctt tgc ttc aca ctc aaa aga aag  
ACAGAATGATTGAACTTTTCATTAATTGACTTCTATTTGTGCTTTTTAGCCT

27555 92 13 0 200 ORF7a-FALTCFSTQFAFACPDGVKHHVYQLRARSVSP54fs  
GGAACATACGAGGGCAATTCACCATTTCATCCTCTAGCTGATAACAAATT  
tgc act gac ttg ctt tag cac tca att tgc ttt tgc ttg tcc tga cgg cgt aaa aca cgt cta tca gtt acg tgc cag atc agt ttc acc ta  
AACTGTTTCATCAGACAAGAGGAAGTTCAAGAACTTTACTCTCCAATTTTTC

29731 44 9 0 143  
TTAATCAGTGTGTAACATTAGGGAGGACTTGAAAGAGCCACCACATTTTC  
acc gag gcc acg cgg agt acg atc gag tgt aca gtg aac aat gc  
TAGGGAGAGCTGCCTATATGGAAGAGCCCTAATGTGTAAAATTAATTTTAG

27555 52 3 0 54 ORF7a-FALTCFSTQFAFACPDGV54fs  
GGAACATACGAGGGCAATTCACCATTTCATCCTCTAGCTGATAACAAATT  
tgc act gac ttg ctt tag cac tca att tgc ttt tgc ttg tcc tga cgg cgt a  
AAACACGTCTATCAGTTACGTGCCAGATCAGTTTCACCTAAACTGTTCATC

27554 92 2 0 41 ORF7a-FALTCFSTQFAFACPDGVKHHVYQLRARSVSP54fs  
TGGAACATACGAGGGCAATTCACCATTTCATCCTCTAGCTGATAACAAAT  
ttg cac tga ctt gct tta gca ctc aat ttg ctt ttg ctt gtc ctg acg gcg taa aac acg tct atc agt tac gtg cca gat cag ttt cac ct  
AAACTGTTTCATCAGACAAGAGGAAGTTCAAGAACTTTACTCTCCAATTTTT

27555 51 1 0 39 ORF7a-FALTCFSTQFAFACPDGV54L  
GGAACATACGAGGGCAATTCACCATTTCATCCTCTAGCTGATAACAAATT  
tgc act gac ttg ctt tag cac tca att tgc ttt tgc ttg tcc tga cgg cgt  
AAAACACGTCTATCAGTTACGTGCCAGATCAGTTTCACCTAAACTGTTCAT

27697 54 8 0 36 ORF7a-LIVAAIVFITLCFTLKRK102del  
AACTGTTTCATCAGACAAGAGGAAGTTCAAGAACTTTACTCTCCAATTTTT  
ctt att gtt gcg gca ata gtg ttt ata aca ctt tgc ttc aca ctc aaa aga aag  
ACAGAATGATTGAACTTTTCATTAATTGACTTCTATTTGTGCTTTTTAGCCT

27579 53 1 0 35 ORF7a-QFAFACPDGVKHHVYQLRA62fs  
TTTCATCCTCTAGCTGATAACAAATTTGCACTGACTTGCTTTAGCACTCA  
att tgc ttt tgc ttg tcc tga cgg cgt aaa aca cgt cta tca gtt acg tgc ca  
GATCAGTTTCACCTAAACTGTTCATCAGACAAGAGGAAGTTCAAGAACTTT

27556 51 1 0 32 ORF7a-ALTCFSTQFAFACPDGV55del  
GAACATACGAGGGCAATTCACCATTTTCATCCTCTAGCTGATAACAAATTT  
gca ctg act tgc ttt agc act caa ttt gct ttt gct tgt cct gac ggc gta  
AAACACGTCTATCAGTTACGTGCCAGATCAGTTTCACCTAAACTGTTCATC

27684 76 1 0 26 ORF7a-YSPIFLIVAAIVFITLCFTLKRKTE\*97fs  
TCAGTTTCACCTAAACTGTTCATCAGACAAGAGGAAGTTCAAGAACTTTA  
ctc tcc aat ttt tct tat tgt tgc ggc aat agt gtt tat aac act ttg ctt cac act caa aag aaa gac aga atg a  
TTGAACTTTCATTAATTGACTTCTATTTGTGCTTTTTAGCCTTTCTGCTAT

27684 76 1 0 26 ORF7b-MI1fs  
TCAGTTTCACCTAAACTGTTCATCAGACAAGAGGAAGTTCAAGAACTTTA  
ctc tcc aat ttt tct tat tgt tgc ggc aat agt gtt tat aac act ttg ctt cac act caa aag aaa gac aga atg a  
TTGAACTTTCATTAATTGACTTCTATTTGTGCTTTTTAGCCTTTCTGCTAT

29738 41 7 0 25  
GTGTGTAACATTAGGGAGGACTTGAAAGAGCCACCACATTTTCACCGAGG  
cca cgc gga gta cga tcg agt gta cag tga aca atg cta gg  
GAGAGCTGCCTATATGGAAGAGCCCTAATGTGTAAAATTAATTTTAGTAGT

27556 67 2 0 23 ORF7a-ALTCFSTQFAFACPDGVKHVYQL55fs  
GAACATACGAGGGCAATTCACCATTTTCATCCTCTAGCTGATAACAAATTT  
gca ctg act tgc ttt agc act caa ttt gct ttt gct tgt cct gac ggc gta aaa cac gtc tat cag t  
TACGTGCCAGATCAGTTTCACCTAAACTGTTCATCAGACAAGAGGAAGTTC

27555 44 3 0 22 ORF7a-FALTCFSTQFAFACP54fs  
GGAACATACGAGGGCAATTCACCATTTTCATCCTCTAGCTGATAACAAATT  
tgc act gac ttg ctt tag cac tca att tgc ttt tgc ttg tcc tg  
ACGGCGTAAAACACGTCTATCAGTTACGTGCCAGATCAGTTTCACCTAAAC

27556 85 9 0 20 ORF7a-ALTCFSTQFAFACPDGVKHVYQLRARSVS55fs  
GAACATACGAGGGCAATTCACCATTTTCATCCTCTAGCTGATAACAAATTT  
gca ctg act tgc ttt agc act caa ttt gct ttt gct tgt cct gac ggc gta aaa cac gtc tat cag tta cgt gcc aga tca gtt t  
CACCTAAACTGTTCATCAGACAAGAGGAAGTTCAAGAACTTTACTCTCCAA

27579 39 5 0 20 ORF7a-QFAFACPDGVKHVY62H  
TTTCATCCTCTAGCTGATAACAAATTTGCACTGACTTGCTTTAGCACTCA  
att tgc ttt tgc ttg tcc tga cgg cgt aaa aca cgt cta  
TCAGTTACGTGCCAGATCAGTTTCACCTAAACTGTTCATCAGACAAGAGGA

27572 53 5 0 19 ORF7a-STQFAFACPDGVKHVYQL60fs  
TTCACCATTTTCATCCTCTAGCTGATAACAAATTTGCACTGACTTGCTTTA  
gca ctc aat ttg ctt ttg ctt gtc ctg acg gcg taa aac acg tct atc agt ta  
CGTGCCAGATCAGTTTCACCTAAACTGTTCATCAGACAAGAGGAAGTTCAA

28008 75 4 0 19 ORF8-IHFYSKWYIRVGARKSAPLIELCVD39del  
TACAGTCATGTACTCAACATCAACCATATGTAGTTGATGACCCGTGTCCT  
att cac ttc tat tct aaa tgg tat att aga gta gga gct aga aaa tca gca cct tta att gaa ttg tgc gtg gat  
GAGGCTGGTTCTAAATCACCCATTCAGTACATCGATATCGGTAATTATACA

27407 54 1 0 19 ORF7a-LFLALITLATCELYHYQEC5R  
AGATGAAGAGCAACCAATGGAGATTGATTAAACGAACATGAAAATTATTC  
ttt tct tgg cac tga taa cac tcg cta ctt gtg agc ttt atc act acc aag agt  
GTGTTAGAGGTACAACAGTACTTTTAAAAGAACCTTGCTCTTCTGGAACAT

28073 47 2 0 18 ORF8-LCVDEAGSKSPIQYID60fs  
AAATGGTATATTAGAGTAGGAGCTAGAAAATCAGCACCTTTAATTGAATT  
gtg cgt gga tga ggc tgg ttc taa atc acc cat tca gta cat cga ta  
TCGGTAATTATACAGTTTCCTGTTTACCTTTTACAATTAATTGCCAGGAAC

29728 39 4 0 17  
TCTTTAATCAGTGTGTAACATTAGGGAGGACTTGAAAGAGCCACCACATT  
ttc acc gag gcc acg cgg agt acg atc gag tgt aca gtg  
AACAATGCTAGGGAGAGCTGCCTATATGGAAGAGCCCTAATGTGTAAAATT

27582 42 3 0 17 ORF7a-FAFACPDGVKHVYQ63del  
CATCCTCTAGCTGATAACAAATTTGCACTGACTTGCTTTAGCACTCAATT  
tgc ttt tgc ttg tcc tga cgg cgt aaa aca cgt cta tca gtt  
ACGTGCCAGATCAGTTTCACCTAAACTGTTTCATCAGACAAGAGGAAGTTCA

27686 76 1 0 16 ORF7a-SPIFLIVAAIVFITLCFTLKRKTE\*98fs  
AGTTTCACCTAAACTGTTTCATCAGACAAGAGGAAGTTCAAGAACTTTACT  
ctc caa ttt ttc tta ttg ttg cgg caa tag tgt tta taa cac ttt gct tca cac tca aaa gaa aga cag aat gat t  
GAACTTTTCATTAATTGACTTCTATTTGTGCTTTTTAGCCTTTCTGCTATTC

27686 76 1 0 16 ORF7b-MI1del  
AGTTTCACCTAAACTGTTTCATCAGACAAGAGGAAGTTCAAGAACTTTACT  
ctc caa ttt ttc tta ttg ttg cgg caa tag tgt tta taa cac ttt gct tca cac tca aaa gaa aga cag aat gat t  
GAACTTTTCATTAATTGACTTCTATTTGTGCTTTTTAGCCTTTCTGCTATTC

21747 39 15 0 15 S-VTWFHAIHVSGTN62del  
CTCAGTTTTACATTCAACTCAGGACTTGTTCTTACCTTTCTTTTCCAATG  
tta ctt ggt tcc atg cta tac atg tct ctg gga cca atg  
GTACTAAGAGGTTTGATAACCCTGTCCTACCATTTAATGATGGTGTTTATT

27580 45 12 0 15 ORF7a-FAFACPDGVKHVYQL63del  
TTCATCCTCTAGCTGATAACAAATTTGCACTGACTTGCTTTAGCACTCAA  
ttt gct ttt gct tgt cct gac ggc gta aaa cac gtc tat cag tta  
CGTGCCAGATCAGTTTCACCTAAACTGTTTCATCAGACAAGAGGAAGTTCAA

29739 36 6 0 15  
TGTGTAACATTAGGGAGGACTTGAAAGAGCCACCACATTTTCACCGAGGC  
cac gcg gag tac gat cga gtg tac agt gaa caa tgc  
TAGGGAGAGCTGCCTATATGGAAGAGCCCTAATGTGTAAAATTAATTTTAG

29731 35 1 0 15  
TTAATCAGTGTGTAACATTAGGGAGGACTTGAAAGAGCCACCACATTTTC  
acc gag gcc acg cgg agt acg atc gag tgt aca gt  
GAACAATGCTAGGGAGAGCTGCCTATATGGAAGAGCCCTAATGTGTAAAAT

27686 73 1 0 15 ORF7a-SPIFLIVAAIVFITLCFTLKRKTE\*98fs  
AGTTTCACCTAAACTGTTTCATCAGACAAGAGGAAGTTCAAGAACTTTACT  
ctc caa ttt ttc tta ttg ttg cgg caa tag tgt tta taa cac ttt gct tca cac tca aaa gaa aga cag aat g  
ATTGAACTTTTCATTAATTGACTTCTATTTGTGCTTTTTAGCCTTTCTGCTA

27686 73 1 0 15 ORF7b-M1del  
AGTTTCACCTAAACTGTTTCATCAGACAAGAGGAAGTTCAAGAACTTTACT  
ctc caa ttt ttc tta ttg ttg cgg caa tag tgt tta taa cac ttt gct tca cac tca aaa gaa aga cag aat g

ATTGAACTTTCATTAATTGACTTCTATTTGTGCTTTTTAGCCTTTCTGCTA

27536 81 1 0 15 ORF7a-PLADNKFALTCFSTQFAFACPDGVKHVY48H  
AAAAGAACCTTGCTCTTCTGGAACATACGAGGGCAATTCACCATTTCATC  
ctc tag ctg ata aca aat ttg cac tga ctt gct tta gca ctc aat ttg ctt ttg ctt gtc ctg acg gcg taa aac acg tct  
ATCAGTTACGTGCCAGATCAGTTTCACCTAAACTGTTTCATCAGACAAGAGG

27555 82 4 0 14 ORF7a-FALTCFSTQFAFACPDGVKHVYQLRARS54fs  
GGAACATACGAGGGGCAATTCACCATTTCATCCTCTAGCTGATAACAAATT  
tgc act gac ttg ctt tag cac tca att tgc ttt tgc ttg tcc tga cgg cgt aaa aca cgt cta tca gtt acg tgc cag atc a  
GTTTCACCTAAACTGTTTCATCAGACAAGAGGAAGTTCAAGAACTTTACTCT

25504 33 3 0 14 ORF3a-QASLPFGWLIV38del  
AGGATGCTACTCCTTCAGATTTTGTTCGCGCTACTGCAACGATACCGATA  
caa gcc tca ctc cct ttc gga tgg ctt att gtt  
GGCGTTGCACTTCTTGCTGTTTTTCAGAGCGCTTCCAAAATCATAACCCTC

27572 71 3 0 14 ORF7a-STQFAFACPDGVKHVYQLRARSVS60fs  
TTCACCATTTCATCCTCTAGCTGATAACAAATTTGCACTGACTTGCTTTA  
gca ctc aat ttg ctt ttg ctt gtc ctg acg gcg taa aac acg tct atc agt tac gtg cca gat cag ttt ca  
CCTAAACTGTTTCATCAGACAAGAGGAAGTTCAAGAACTTTACTCTCCAATT

29729 42 1 0 13  
CTTTAATCAGTGTGTAACATTAGGGAGGACTTGAAAGAGCCACCACATTT  
tca ccg agg cca cgc gga gta cga tcg agt gta cag tga aca  
ATGCTAGGGAGAGCTGCCTATATGGAAGAGCCCTAATGTGTAAAATTAATT

27579 42 4 0 12 ORF7a-FAFACPDGVKHVYQ63del  
TTTCATCCTCTAGCTGATAACAAATTTGCACTGACTTGCTTTAGCACTCA  
att tgc ttt tgc ttg tcc tga cgg cgt aaa aca cgt cta tca  
GTTACGTGCCAGATCAGTTTCACCTAAACTGTTTCATCAGACAAGAGGAAGT

27686 77 4 0 11 ORF7a-SPIFLIVAAIVFITLCFTLKRKTE\*98fs  
AGTTTCACCTAAACTGTTTCATCAGACAAGAGGAAGTTCAAGAACTTTACT  
ctc caa ttt ttc tta ttg ttg cgg caa tag tgt tta taa cac ttt gct tca cac tca aaa gaa aga cag aat gat tg  
AACTTTCATTAATTGACTTCTATTTGTGCTTTTTAGCCTTTCTGCTATTCC

27686 77 4 0 11 ORF7b-MIE1fs  
AGTTTCACCTAAACTGTTTCATCAGACAAGAGGAAGTTCAAGAACTTTACT  
ctc caa ttt ttc tta ttg ttg cgg caa tag tgt tta taa cac ttt gct tca cac tca aaa gaa aga cag aat gat tg  
AACTTTCATTAATTGACTTCTATTTGTGCTTTTTAGCCTTTCTGCTATTCC

27570 55 2 0 11 ORF7a-FSTQFAFACPDGVKHVYQL59fs  
AATTCACCATTTCATCCTCTAGCTGATAACAAATTTGCACTGACTTGCTT  
tag cac tca att tgc ttt tgc ttg tcc tga cgg cgt aaa aca cgt cta tca gtt a  
CGTGCCAGATCAGTTTCACCTAAACTGTTTCATCAGACAAGAGGAAGTTCAA

27705 36 1 0 11 ORF7a-AAIVFITLCFTL105del  
ATCAGACAAGAGGAAGTTCAAGAACTTTACTCTCCAATTTTCTTATTGT  
tgc ggc aat agt gtt tat aac act ttg ctt cac act  
CAAAAGAAAGACAGAATGATTGAACTTTCATTAATTGACTTCTATTTGTGC

29726 45 8 0 10  
AATCTTTAATCAGTGTGTAACATTAGGGAGGACTTGAAAGAGCCACCACA

ttt tca ccg agg cca cgc gga gta cga tcg agt gta cag tga aca  
ATGCTAGGGAGAGCTGCCTATATGGAAGAGCCCTAATGTGTAAAATTAATT

27562 79 3 0 10 ORF7a-TCFSTQFAFACPDGVKHHVYQLRARSVS57fs  
ACGAGGGCAATTCACCATTTTCATCCTCTAGCTGATAACAAATTTGCACTG  
act tgc ttt agc act caa ttt gct ttt gct tgt cct gac ggc gta aaa cac gtc tat cag tta cgt gcc aga tca gtt t  
CACCTAAACTGTTTCATCAGACAAGAGGAAGTTCAAGAACTTTACTCTCCAA

27577 59 3 0 10 ORF7a-QFAFACPDGVKHHVYQLRARS62fs  
CATTTTCATCCTCTAGCTGATAACAAATTTGCACTGACTTGCTTTAGCACT  
caa ttt gct ttt gct tgt cct gac ggc gta aaa cac gtc tat cag tta cgt gcc aga tc  
AGTTTCACCTAAACTGTTTCATCAGACAAGAGGAAGTTCAAGAACTTTACTC

27556 63 2 0 10 ORF7a-ALTCFSTQFAFACPDGVKHHVY55del  
GAACATACGAGGGCAATTCACCATTTTCATCCTCTAGCTGATAACAAATTT  
gca ctg act tgc ttt agc act caa ttt gct ttt gct tgt cct gac ggc gta aaa cac gtc tat  
CAGTTACGTGCCAGATCAGTTTCACCTAAACTGTTTCATCAGACAAGAGGAA

27688 63 6 0 9 ORF7a-PIFLIVAAIVFITLCFTLKRK99del  
TTTCACCTAAACTGTTTCATCAGACAAGAGGAAGTTCAAGAACTTTACTCT  
cca att ttt ctt att gtt gcg gca ata gtg ttt ata aca ctt tgc ttc aca ctc aaa aga aag  
ACAGAATGATTGAACTTTTCATTAATTGACTTCTATTTGTGCTTTTTAGCCT

27684 72 6 0 9 ORF7a-YSPIFLIVAAIVFITLCFTLKRKTE97\*  
TCAGTTTCACCTAAACTGTTTCATCAGACAAGAGGAAGTTCAAGAACTTTA  
ctc tcc aat ttt tct tat tgt tgc ggc aat agt gtt tat aac act ttg ctt cac act caa aag aaa gac aga  
ATGATTGAACTTTTCATTAATTGACTTCTATTTGTGCTTTTTAGCCTTTCTG

27560 84 5 0 9 ORF7a-LTCFSTQFAFACPDGVKHHVYQLRARSVS56del  
ATACGAGGGCAATTCACCATTTTCATCCTCTAGCTGATAACAAATTTGCAC  
tga ctt gct tta gca ctc aat ttg ctt ttg ctt gtc ctg acg gcg taa aac acg tct atc agt tac gtg cca gat cag ttt cac  
CTAAACTGTTTCATCAGACAAGAGGAAGTTCAAGAACTTTACTCTCCAATTT

27683 52 3 0 9 ORF7a-YSPIFLIVAAIVFITLCF97fs  
ATCAGTTTCACCTAAACTGTTTCATCAGACAAGAGGAAGTTCAAGAACTTT  
act ctc caa ttt ttc tta ttg ttg cgg caa tag tgt tta taa cac ttt gct t  
CACACTCAAAGAAAGACAGAATGATTGAACTTTTCATTAATTGACTTCTAT

27686 61 2 0 9 ORF7a-SPIFLIVAAIVFITLCFTLKR98fs  
AGTTTCACCTAAACTGTTTCATCAGACAAGAGGAAGTTCAAGAACTTTACT  
ctc caa ttt ttc tta ttg ttg cgg caa tag tgt tta taa cac ttt gct tca cac tca aaa g  
AAAGACAGAATGATTGAACTTTTCATTAATTGACTTCTATTTGTGCTTTTTA

27566 65 2 0 9 ORF7a-CFSTQFAFACPDGVKHHVYQLRA58fs  
GGGCAATTCACCATTTTCATCCTCTAGCTGATAACAAATTTGCACTGACTT  
gct tta gca ctc aat ttg ctt ttg ctt gtc ctg acg gcg taa aac acg tct atc agt tac gtg cc  
AGATCAGTTTCACCTAAACTGTTTCATCAGACAAGAGGAAGTTCAAGAACTT

27566 76 1 0 9 ORF7a-CFSTQFAFACPDGVKHHVYQLRARSVS58fs  
GGGCAATTCACCATTTTCATCCTCTAGCTGATAACAAATTTGCACTGACTT  
gct tta gca ctc aat ttg ctt ttg ctt gtc ctg acg gcg taa aac acg tct atc agt tac gtg cca gat cag ttt c  
ACCTAAACTGTTTCATCAGACAAGAGGAAGTTCAAGAACTTTACTCTCCAAT

27555 91 1 0 9 ORF7a-FALTCFSTQFAFACPDGVKHHVYQLRARSVSP54fs

GGAACATACGAGGGCAATTCACCATTTTCATCCTCTAGCTGATAACAAATT  
tgc act gac ttg ctt tag cac tca att tgc ttt tgc ttg tcc tga cgg cgt aaa aca cgt cta tca gtt acg tgc cag atc agt ttc acc t  
AAACTGTTTCATCAGACAAGAGGAAGTTCAAGAACTTTACTCTCCAATTTTT

29724 47 2 0 8  
GCAATCTTTAATCAGTGTGTAACATTAGGGAGGACTTGAAAGAGCCACCA  
cat ttt cac cga ggc cac gcg gag tac gat cga gtg tac agt gaa ca  
ATGCTAGGGAGAGCTGCCTATATGGAAGAGCCCTAATGTGTAAAATTAATT

27549 115 1 0 8 ORF7a-NKFALTCFSTQFAFACPDGVKHHVYQLRARSVSPKLFIRQ52fs  
TCTTCTGGAACATACGAGGGCAATTCACCATTTTCATCCTCTAGCTGATAA  
caa att tgc act gac ttg ctt tag cac tca att tgc ttt tgc ttg tcc tga cgg cgt aaa aca cgt cta tca gtt acg tgc cag atc agt ttc acc taa  
act gtt cat cag aca a  
GAGGAAGTTCAAGAACTTTACTCTCCAATTTTTCTTATTGTTGCGGCAATA

28077 36 1 0 8 ORF8-VDEAGSKSPIQY62del  
GGTATATTAGAGTAGGAGCTAGAAAATCAGCACCTTTAATTGAATTGTGC  
gtg gat gag gct ggt tct aaa tca ccc att cag tac  
ATCGATATCGGTAATTATACAGTTTCCTGTTTACCTTTTACAATTAATTGC

28090 69 1 0 8 ORF8-GSKSPIQYIDIGNYTVSCLPFTIN66D  
AGGAGCTAGAAAATCAGCACCTTTAATTGAATTGTGCGTGGATGAGGCTG  
gtt cta aat cac cca ttc agt aca tgc ata tgc gta att ata cag ttt cct gtt tac ctt tta caa tta  
ATTGCCAGGAACCTAAATTGGGTAGTCTTGTAGTGCGTTGTTTCGTTCTATG

27703 40 1 0 8 ORF7a-VAAIVFITLCFTLK104fs  
TCATCAGACAAGAGGAAGTTCAAGAACTTTACTCTCCAATTTTTCTTATT  
gtt gcg gca ata gtg ttt ata aca ctt tgc ttc aca etc a  
AAAGAAAGACAGAATGATTGAACTTTCATTAATTGACTTCTATTTGTGCTT

27573 60 4 0 7 ORF7a-STQFAFACPDGVKHHVYQLRA60del  
TCACCATTTTCATCCTCTAGCTGATAACAAATTTGCACTGACTTGCTTTAG  
cac tca att tgc ttt tgc ttg tcc tga cgg cgt aaa aca cgt cta tca gtt acg tgc cag  
ATCAGTTTTCACCTAAACTGTTTCATCAGACAAGAGGAAGTTCAAGAACTTTA

27703 39 4 0 7 ORF7a-VAAIVFITLCFTL104del  
TCATCAGACAAGAGGAAGTTCAAGAACTTTACTCTCCAATTTTTCTTATT  
gtt gcg gca ata gtg ttt ata aca ctt tgc ttc aca etc  
AAAAGAAAGACAGAATGATTGAACTTTCATTAATTGACTTCTATTTGTGCT

29729 33 4 0 7  
CTTTAATCAGTGTGTAACATTAGGGAGGACTTGAAAGAGCCACCACATTT  
tca ccg agg cca cgc gga gta cga tgc agt gta  
CAGTGAACAATGCTAGGGAGAGCTGCCTATATGGAAGAGCCCTAATGTGTA

27687 49 3 0 7 ORF7a-SPIFLIVAAIVFITLCF98fs  
GTTTCACCTAAACTGTTTCATCAGACAAGAGGAAGTTCAAGAACTTTACTC  
tcc aat ttt tct tat tgt tgc ggc aat agt gtt tat aac act ttg ctt c  
ACACTCAAAGAAAGACAGAATGATTGAACTTTCATTAATTGACTTCTATT

27329 65 2 0 7 ORF6-SLTENKYSQLDDEEQPMEID\*43fs  
TTGGAATCTTGATTACATCATAAACCTCATAATTAATAAATTTATCTAAGT  
cac taa ctg aga ata aat att etc aat tag atg aag agc aac caa tgg aga ttg att aaa cga ac  
ATGAAAATTATTCTTTTCTTGGCACTGATAAACTCGCTACTTGTGAGCTT

28010 111 2 0 7 ORF8-HFYSKWYIRVGARKSAPLIELCVDEAGSKSPIQYIDI40del  
CAGTCATGTACTCAACATCAACCATATGTAGTTGATGACCCGTGTCCTAT  
tca ctt cta ttc taa atg gta tat tag agt agg agc tag aaa atc agc acc ttt aat tga att gtg cgt gga tga ggc tgg ttc taa atc acc cat  
tca gta cat cga tat  
CGGTAATTATACAGTTTCCTGTTTACCTTTTACAATTAATTGCCAGGAACC

29728 42 2 0 7  
TCTTTAATCAGTGTGTAACATTAGGGAGGACTTGAAAGAGCCACCACATT  
ttc acc gag gcc acg cgg agt acg atc gag tgt aca gtg aac  
AATGCTAGGGAGAGCTGCCTATATGGAAGAGCCCTAATGTGTAAAATTAAT

29732 36 3 0 6  
TAATCAGTGTGTAACATTAGGGAGGACTTGAAAGAGCCACCACATTTTCA  
ccg agg cca cgc gga gta cga tgc agt gta cag tga  
ACAATGCTAGGGAGAGCTGCCTATATGGAAGAGCCCTAATGTGTAAAATTA

27684 80 3 0 6 ORF7a-YSPIFLIVAAIVFITLCFTLKRKTE\*97fs  
TCAGTTTCACCTAAACTGTTTCATCAGACAAGAGGAAGTTCAAGAACTTTA  
ctc tcc aat ttt tct tat tgt tgc ggc aat agt gtt tat aac act ttg ctt cac act caa aag aaa gac aga atg att ga  
ACTTTCATTAATTGACTTCTATTTGTGCTTTTTAGCCTTTCTGCTATTCCT

27684 80 3 0 6 ORF7b-MIE1fs  
TCAGTTTCACCTAAACTGTTTCATCAGACAAGAGGAAGTTCAAGAACTTTA  
ctc tcc aat ttt tct tat tgt tgc ggc aat agt gtt tat aac act ttg ctt cac act caa aag aaa gac aga atg att ga  
ACTTTCATTAATTGACTTCTATTTGTGCTTTTTAGCCTTTCTGCTATTCCT

28068 52 3 0 6 ORF8-ELCVDEAGSKSPIQYIDI59fs  
ATTCTAAATGGTATATTAGAGTAGGAGCTAGAAAATCAGCACCTTTAATT  
gaa ttg tgc gtg gat gag gct ggt tct aaa tca ccc att cag tac atc gat a  
TCGGTAATTATACAGTTTCCTGTTTACCTTTTACAATTAATTGCCAGGAAC

28008 74 2 0 6 ORF8-IHFYSKWYIRVGARKSAPLIELCVD39fs  
TACAGTCATGTACTCAACATCAACCATATGTAGTTGATGACCCGTGTCCT  
att cac ttc tat tct aaa tgg tat att aga gta gga gct aga aaa tca gca cct tta att gaa ttg tgc gtg ga  
TGAGGCTGGTTCTAAATCACCCATTCAGTACATCGATATCGGTAATTATAC

27573 49 2 0 6 ORF7a-STQFAFACPDGVKHHVYQ60fs  
TCACCATTTCATCCTCTAGCTGATAACAAATTTGCACTGACTTGCTTTAG  
cac tca att tgc ttt tgc ttg tcc tga cgg cgt aaa aca cgt cta tca g  
TTACGTGCCAGATCAGTTTCACCTAAACTGTTTCATCAGACAAGAGGAAGTT

27556 84 2 0 6 ORF7a-ALTCFSTQFAFACPDGVKHHVYQLRARSV55del  
GAACATACGAGGGCAATTCACCATTTTCATCCTCTAGCTGATAACAAATTT  
gca ctg act tgc ttt agc act caa ttt gct ttt gct tgt cct gac ggc gta aaa cac gtc tat cag tta cgt gcc aga tca gtt  
TCACCTAAACTGTTTCATCAGACAAGAGGAAGTTCAAGAACTTTACTCTCCA

27570 71 2 0 6 ORF7a-FSTQFAFACPDGVKHHVYQLRARSV59fs  
AATTCACCATTTTCATCCTCTAGCTGATAACAAATTTGCACTGACTTGCTT  
tag cac tca att tgc ttt tgc ttg tcc tga cgg cgt aaa aca cgt cta tca gtt acg tgc cag atc agt tt  
CACCTAAACTGTTTCATCAGACAAGAGGAAGTTCAAGAACTTTACTCTCCAA

27583 58 1 0 6 ORF7a-AFACPDGVKHHVYQLRARSVS64fs  
ATCCTCTAGCTGATAACAAATTTGCACTGACTTGCTTTAGCACTCAATTT



gct ttt gct tgt cct gac ggc gta aaa cac gtc tat cag tta cgt gcc aga tca gtt t  
CACCTAAACTGTTTCATCAGACAAGAGGAAGTTCAAGAAGTTTACTCTCCAA

27580 44 4 0 5 ORF7a-FAFACPDGVKHVYQL63fs  
TTCATCCTCTAGCTGATAACAAATTTGCACTGACTTGCTTTAGCACTCAA  
ttt gct ttt gct tgt cct gac ggc gta aaa cac gtc tat cag tt  
ACGTGCCAGATCAGTTTCACCTAAACTGTTTCATCAGACAAGAGGAAGTTCA

27683 58 3 0 5 ORF7a-YSPIFLIVAAIVFITLCFTL97fs  
ATCAGTTTCACCTAAACTGTTTCATCAGACAAGAGGAAGTTCAAGAAGTTT  
act ctc caa ttt ttc tta ttg ttg cgg caa tag tgt tta taa cac ttt gct tca cac t  
CAAAAGAAAGACAGAATGATTGAACTTTCATTAATTGACTTCTATTTGTGC

29732 39 2 0 5  
TAATCAGTGTGTAACATTAGGGAGGACTTGAAAGAGCCACCACATTTTCA  
ccg agg cca cgc gga gta cga tcg agt gta cag tga aca  
ATGCTAGGGAGAGCTGCCTATATGGAAGAGCCCTAATGTGTAAAATTAATT

27521 45 1 0 5 ORF7a-NSPFHPLADNKFALTC43S  
TACAACAGTACTTTTAAAAGAACCTTGCTCTTCTGGAACATACGAGGGCA  
att cac cat ttc atc ctc tag ctg ata aca aat ttg cac tga ctt  
GCTTTAGCACTCAATTTGCTTTTGCTTGTCTGACGGCGTAAAACACGTCT

27238 88 1 0 5 ORF6-EILLIIMRTFKVSIWNLDYIINLIKNLSK13fs  
GTAAGTGACAACAGATGTTTCATCTCGTTGACTTTCAGGTTACTATAGCA  
gag ata tta cta att att atg agg act ttt aaa gtt tcc att tgg aat ctt gat tac atc ata aac ctc ata att aaa aat tta tct a  
AGTCACTAACTGAGAATAAATATTCTCAATTAGATGAAGAGCAACCAATGG

27556 64 1 0 5 ORF7a-ALTCFSTQFAFACPDGVKHVYQ55fs  
GAACATACGAGGGCAATTCACCATTTTCATCCTCTAGCTGATAACAAATTT  
gca ctg act tgc ttt agc act caa ttt gct ttt gct tgt cct gac ggc gta aaa cac gtc tat c  
AGTTACGTGCCAGATCAGTTTCACCTAAACTGTTTCATCAGACAAGAGGAAG

27566 64 1 0 5 ORF7a-CFSTQFAFACPDGVKHVYQLRA58fs  
GGGCAATTCACCATTTTCATCCTCTAGCTGATAACAAATTTGCACTGACTT  
gct tta gca ctc aat ttg ctt ttg ctt gtc ctg acg gcg taa aac acg tct atc agt tac gtg c  
CAGATCAGTTTCACCTAAACTGTTTCATCAGACAAGAGGAAGTTCAAGAAGT

27566 58 3 0 4 ORF7a-CFSTQFAFACPDGVKHVYQL58fs  
GGGCAATTCACCATTTTCATCCTCTAGCTGATAACAAATTTGCACTGACTT  
gct tta gca ctc aat ttg ctt ttg ctt gtc ctg acg gcg taa aac acg tct atc agt t  
ACGTGCCAGATCAGTTTCACCTAAACTGTTTCATCAGACAAGAGGAAGTTCA

28027 131 3 0 4 ORF8-WYIRVGARKSAPLIELCVDEAGSKSPIQYIDIGNYTVSCLPFTI45  
TCAACCATATGTAGTTGATGACCCGTGTCCTATTCATTCTATTCTAAAT  
ggt ata tta gag tag gag cta gaa aat cag cac ctt taa ttg aat tgt gcg tgg atg agg ctg gtt cta aat cac cca ttc agt aca tcg ata tcg  
gta att ata cag ttt cct gtt tac ctt tta caa tt  
AATTGCCAGGAACCTAAATTGGGTAGTCTTGTAGTGC GTTGTTCGTTCTAT

29729 38 3 0 4  
CTTTAATCAGTGTGTAACATTAGGGAGGACTTGAAAGAGCCACCACATTT  
tca ccg agg cca cgc gga gta cga tcg agt gta cag tg  
AACAATGCTAGGGAGAGCTGCCTATATGGAAGAGCCCTAATGTGTAAAATT

29726 51 3 0 4  
AATCTTTAATCAGTGTGTAACATTAGGGAGGACTTGAAAGAGCCACCACA  
ttt tca ccg agg cca cgc gga gta cga tgc agt gta cag tga aca atg cta  
GGGAGAGCTGCCTATATGGAAGAGCCCTAATGTGTAAAATTAATTTTAGTA

27577 34 2 0 4 ORF7a-QFAFACPDGVKH62fs  
CATTTTCATCCTCTAGCTGATAACAAATTTGCACTGACTTGCTTTAGCACT  
caa ttt gct ttt gct tgt cct gac ggc gta aaa c  
ACGTCTATCAGTTACGTGCCAGATCAGTTTCACCTAAACTGTTCATCAGAC

27555 70 2 0 4 ORF7a-FALTCFSTQFAFACPDGVKHVYQL54fs  
GGAACATACGAGGGCAATTCACCATTTCATCCTCTAGCTGATAACAAATT  
tgc act gac ttg ctt tag cac tca att tgc ttt tgc ttg tcc tga cgg cgt aaa aca cgt cta tca gtt a  
CGTGCCAGATCAGTTTCACCTAAACTGTTCATCAGACAAGAGGAAGTTCAA

27694 49 2 0 4 ORF7a-FLIVAAIVFITLCFTLK101fs  
CTAAACTGTTCATCAGACAAGAGGAAGTTCAAGAACTTTACTCTCCAATT  
ttt ctt att gtt gcg gca ata gtg ttt ata aca ctt tgc ttc aca ctc a  
AAAGAAAGACAGAATGATTGAACTTTCATTAATTGACTTCTATTTGTGCTT

27599 42 1 0 4 ORF7a-DGVKHVYQLRARSVS69A  
CAAATTTGCACTGACTTGCTTTAGCACTCAATTTGCTTTTGCTTGTCTG  
acg gcg taa aac acg tct atc agt tac gtg cca gat cag ttt  
CACCTAAACTGTTCATCAGACAAGAGGAAGTTCAAGAACTTTACTCTCCAA

28043 69 1 0 4 ORF8-ARKSAPLIELCVDEAGSKSPIQY51del  
GATGACCCGTGTCCTATTCACCTTCTATTCTAAATGGTATATTAGAGTAGG  
agc tag aaa atc agc acc ttt aat tga att gtg cgt gga tga ggc tgg ttc taa atc acc cat tca gta  
CATCGATATCGGTAATTATACAGTTTCCTGTTTACCTTTTACAATTAATTG

27579 77 1 0 4 ORF7a-QFAFACPDGVKHVYQLRARSVSPKLF62fs  
TTTCATCCTCTAGCTGATAACAAATTTGCACTGACTTGCTTTAGCACTCA  
att tgc ttt tgc ttg tcc tga cgg cgt aaa aca cgt cta tca gtt acg tgc cag atc agt ttc acc taa act gtt ca  
TCAGACAAGAGGAAGTTCAAGAACTTTACTCTCCAATTTTCTTATTGTTG

27559 88 1 0 4 ORF7a-LTCFSTQFAFACPDGVKHVYQLRARSVSPK56fs  
CATACGAGGGCAATTCACCATTTCATCCTCTAGCTGATAACAAATTTGCA  
ctg act tgc ttt agc act caa ttt gct ttt gct tgt cct gac ggc gta aaa cac gtc tat cag tta cgt gcc aga tca gtt tca cct a  
AACTGTTCATCAGACAAGAGGAAGTTCAAGAACTTTACTCTCCAATTTTTC

28003 162 1 0 4 ORF8-CPIHFYSKWYIRVGARKSAPLIELCVDEAGSKSPIQYIDIGNYTVS  
TAGTTTACAGTCATGTACTCAACATCAACCATATGTAGTTGATGACCCGT  
gtc cta ttc act tct att cta aat ggt ata tta gag tag gag cta gaa aat cag cac ctt taa ttg aat tgt gcg tgg atg agg ctg gtt cta aat  
cac cca ttc agt aca tgc ata tgc gta att ata cag ttt cct gtt tac ctt tta caa tta att gcc  
AGGAACCTAAATTGGGTAGTCTTGTAGTGCGTTGTTTCGTTCTATGAAGACT

27656 87 1 0 4 ORF7a-IRQEEVQELYSPIFLIVAAIVFITLCFTL88del  
AAAACACGTCTATCAGTTACGTGCCAGATCAGTTTCACCTAAACTGTTC  
tca gac aag agg aag ttc aag aac ttt act ctc caa ttt ttc tta ttg ttg cgg caa tag tgt tta taa cac ttt gct tca cac tca  
AAAGAAAGACAGAATGATTGAACTTTCATTAATTGACTTCTATTTGTGCTT

27553 56 1 0 4 ORF7a-FALTCFSTQFAFACPDGVK54fs  
CTGGAACATACGAGGGCAATTCACCATTTCATCCTCTAGCTGATAACAAA  
ttt gca ctg act tgc ttt agc act caa ttt gct ttt gct tgt cct gac ggc gta aa

ACACGTCTATCAGTTACGTGCCAGATCAGTTTCACCTAAACTGTTTCATCAG

27586 33 1 0 4 ORF7a-FACPDGVKHVY65del  
CTCTAGCTGATAACAAATTTGCACTGACTTGCTTTAGCACTCAATTTGCT  
ttt gct tgt cct gac ggc gta aaa cac gtc tat  
CAGTTACGTGCCAGATCAGTTTCACCTAAACTGTTTCATCAGACAAGAGGAA

27693 33 1 0 4 ORF7a-FLIVAAIVFIT101del  
CCTAAACTGTTTCATCAGACAAGAGGAAGTTCAAGAACTTTACTCTCCAAT  
ttt tct tat tgt tgc ggc aat agt gtt tat aac  
ACTTTGCTTCACACTCAAAAGAAAGACAGAATGATTGAACTTTCATTAATT

5652 36 3 0 3 ORF1a-YLVQQESPVM1796del  
TAAGAAAGGTGTTTCAGATACCTTGACGTGTGGTAAACAAGCTACAAAAT  
atc tag tac aac agg agt cac ctt ttg tta tga tgt  
CAGCACCACCTGCTCAGTATGAACTTAAGCATGGTACATTTACTTGTGCTA

27406 56 3 0 3 ORF7a-LFLALITLATCELYHYQEC5fs  
TAGATGAAGAGCAACCAATGGAGATTGATTAAACGAACATGAAAATTATT  
ctt ttc ttg gca ctg ata aca ctc gct act tgt gag ctt tat cac tac caa gag tg  
TGTTAGAGGTACAACAGTACTTTTAAAAGAACCTTGCTCTTCTGGAACATA

27583 36 3 0 3 ORF7a-AFACPDGVKHVY64del  
ATCCTCTAGCTGATAACAAATTTGCACTGACTTGCTTTAGCACTCAATTT  
gct ttt gct tgt cct gac ggc gta aaa cac gtc tat  
CAGTTACGTGCCAGATCAGTTTCACCTAAACTGTTTCATCAGACAAGAGGAA

426 33 3 0 3 ORF1a-VEVEKGVLPQL54del  
GGTCTTATCAGAGGCACGTCAACATCTTAAAGATGGCACTTGTGGCTTAG  
tag aag ttg aaa aag ggc ttt tgc ctc aac ttg  
AACAGCCCTATGTGTTTCATCAAACGTTTCGGATGCTCGAACTGCACCTCATG

27565 66 3 0 3 ORF7a-CFSTQFAFACPDGVKHVYQLRA58del  
AGGGCAATTCACCATTTTCATCCTCTAGCTGATAACAAATTTGCACTGACT  
tgc ttt agc act caa ttt gct ttt gct tgt cct gac ggc gta aaa cac gtc tat cag tta cgt gcc  
AGATCAGTTTCACCTAAACTGTTTCATCAGACAAGAGGAAGTTCAAGAACTT

27553 96 3 0 3 ORF7a-FALTQFAFACPDGVKHVYQLRARSVSPK54del  
CTGGAACATACGAGGGCAATTCACCATTTTCATCCTCTAGCTGATAACAAA  
ttt gca ctg act tgc ttt agc act caa ttt gct ttt gct tgt cct gac ggc gta aaa cac gtc tat cag tta cgt gcc aga tca gtt tca cct aaa  
CTGTTCATCAGACAAGAGGAAGTTCAAGAACTTTACTCTCCAATTTTCTT

29733 43 2 0 3  
AATCAGTGTGTAACATTAGGGAGGACTTGAAAGAGCCACCACATTTTCAC  
cga ggc cac gcg gag tac gat cga gtg tac agt gaa caa tgc t  
AGGGAGAGCTGCCTATATGGAAGAGCCCTAATGTGTAATAATTTTAGT

27575 43 2 0 3 ORF7a-TQFAFACPDGVKHVY61fs  
ACCATTTTCATCCTCTAGCTGATAACAAATTTGCACTGACTTGCTTTAGCA  
ctc aat ttg ctt ttg ctt gtc ctg acg gcg taa aac acg tct a  
TCAGTTACGTGCCAGATCAGTTTCACCTAAACTGTTTCATCAGACAAGAGGA

27684 73 2 0 3 ORF7a-YSPIFLIVAAIVFITLCFTLKRKTE97fs  
TCAGTTTCACCTAAACTGTTTCATCAGACAAGAGGAAGTTCAAGAACTTTA

ctc tcc aat ttt tct tat tgt tgc ggc aat agt gtt tat aac act ttg ctt cac act caa aag aaa gac aga a  
TGATTGAACTTTTCATTAATTGACTTCTATTTGTGCTTTTTAGCCTTTCTGC

27684 73 2 0 3 ORF7b-M1fs  
TCAGTTTCACCTAAACTGTTTCATCAGACAAGAGGAAGTTCAAGAACTTTA  
ctc tcc aat ttt tct tat tgt tgc ggc aat agt gtt tat aac act ttg ctt cac act caa aag aaa gac aga a  
TGATTGAACTTTTCATTAATTGACTTCTATTTGTGCTTTTTAGCCTTTCTGC

27566 51 2 0 3 ORF7a-CFSTQFAFACPDGVKHHV58del  
GGGCAATTCACCATTTTCATCCTCTAGCTGATAACAAATTTGCACTGACTT  
gct tta gca ctc aat ttg ctt ttg ctt gtc ctg acg gcg taa aac acg tct  
ATCAGTTACGTGCCAGATCAGTTTCACCTAAACTGTTTCATCAGACAAGAGG

188 36 2 0 3  
AACTAATTACTGTCGTTGACAGGACACGAGTAACTCGTCTATCTTCTGCA  
ggc tgc tta cgg ttt cgt ccg tgt tgc agc cga tca  
TCAGCACATCTAGGTTTCGTCCGGGTGTGACCGAAAGGTAAGATGGAGAGC

27576 50 2 0 3 ORF7a-TQFAFACPDGVKHVYQL61fs  
CCATTTTCATCCTCTAGCTGATAACAAATTTGCACTGACTTGCTTTAGCAC  
tea att tgc ttt tgc ttg tcc tga cgg cgt aaa aca cgt cta tea gtt ac  
GTGCCAGATCAGTTTCACCTAAACTGTTTCATCAGACAAGAGGAAGTTCAAG

27555 86 2 0 3 ORF7a-FALTQFAFACPDGVKHVYQLRARSV54fs  
GGAACATACGAGGGCAATTCACCATTTTCATCCTCTAGCTGATAACAAATT  
tgc act gac ttg ctt tag cac tea att tgc ttt tgc ttg tcc tga cgg cgt aaa aca cgt cta tea gtt acg tgc cag atc agt tt  
CACCTAAACTGTTTCATCAGACAAGAGGAAGTTCAAGAACTTTACTCTCCAA

27555 87 2 0 3 ORF7a-FALTQFAFACPDGVKHVYQLRARSVS54L  
GGAACATACGAGGGCAATTCACCATTTTCATCCTCTAGCTGATAACAAATT  
tgc act gac ttg ctt tag cac tea att tgc ttt tgc ttg tcc tga cgg cgt aaa aca cgt cta tea gtt acg tgc cag atc agt ttc  
ACCTAAACTGTTTCATCAGACAAGAGGAAGTTCAAGAACTTTACTCTCCAAT

27716 39 2 0 3 ORF7a-VFITLCFTLKRKT108del  
GGAAGTTCAAGAACTTTACTCTCCAATTTTTCTTATTGTTGCGGCAATAG  
tgt tta taa cac ttt gct tea cac tea aaa gaa aga cag  
AATGATTGAACTTTTCATTAATTGACTTCTATTTGTGCTTTTTAGCCTTTCT

27397 122 1 0 3 ORF7a-KIILFLALITLATCELYHYQECVRGTTVLLKEPCSSGTYEG2fs  
ATTCTCAATTAGATGAAGAGCAACCAATGGAGATTGATTAAACGAACATG  
aaa att att ctt ttc ttg gca ctg ata aca ctc gct act tgt gag ctt tat cac tac caa gag tgt gtt aga ggt aca aca gta ctt tta aaa gaa cct  
tgc tct tct gga aca tac gag gg  
CAATTCACCATTTTCATCCTCTAGCTGATAACAAATTTGCACTGACTTGCTT

27551 70 1 0 3 ORF7a-KFALTQFAFACPDGVKHVYQ53fs  
TTCTGGAACATACGAGGGCAATTCACCATTTTCATCCTCTAGCTGATAACA  
aat ttg cac tga ctt gct tta gca ctc aat ttg ctt ttg ctt gtc ctg acg gcg taa aac acg tct atc a  
GTTACGTGCCAGATCAGTTTCACCTAAACTGTTTCATCAGACAAGAGGAAGT

27548 108 1 0 3 ORF7a-NKFALTQFAFACPDGVKHVYQLRARSVSPKLF52del  
CTCTTCTGGAACATACGAGGGCAATTCACCATTTTCATCCTCTAGCTGATA  
aca aat ttg cac tga ctt gct tta gca ctc aat ttg ctt ttg ctt gtc ctg acg gcg taa aac acg tct atc agt tac gtg cca gat cag ttt cac cta  
aac tgt tea  
TCAGACAAGAGGAAGTTCAAGAACTTTACTCTCCAATTTTTCTTATTGTTG

27558 92 1 0 3 ORF7a-ALTCFSTQFAFACPDGVKHVYQLRARSVSPK55fs  
ACATACGAGGGCAATTCACCATTTTCATCCTCTAGCTGATAACAAATTTGC  
act gac ttg ctt tag cac tca att tgc ttt tgc ttg tcc tga cgg cgt aaa aca cgt cta tca gtt acg tgc cag atc agt ttc acc taa ac  
TGTTTCATCAGACAAGAGGAAGTTCAAGAAGTTTACTCTCCAATTTTCTTA

27270 33 1 0 3 ORF6-KVSIWNLDYII23del  
TTTCAGGTTACTATAGCAGAGATATTACTAATTATTATGAGGACTTTTAA  
agt ttc cat ttg gaa tct tga tta cat cat aaa  
CCTCATAATTAATAAATTTATCTAAGTCACTAACTGAGAATAAATATTCTCA

28006 49 1 0 3 ORF8-PIHFYSKWYIRVGARKS38fs  
TTTACAGTCATGTACTCAACATCAACCATATGTAGTTGATGACCCGTGTC  
cta ttc act tct att cta aat ggt ata tta gag tag gag cta gaa aat c  
AGCACCTTTAATTGAATTGTGCGTGGATGAGGCTGGTTCTAAATCACCCAT

27542 75 1 0 3 ORF7a-ADNKFALTCFSTQFAFACPDGVKHVY50D  
ACCTTGCTCTTCTGGAACATACGAGGGCAATTCACCATTTTCATCCTCTAG  
ctg ata aca aat ttg cac tga ctt gct tta gca ctc aat ttg ctt ttg ctt gtc ctg acg gcg taa aac acg tct  
ATCAGTTACGTGCCAGATCAGTTTCACCTAACTGTTTCATCAGACAAGAGG

27572 48 1 0 3 ORF7a-STQFAFACPDGVKHVYQ60K  
TTCACCATTTTCATCCTCTAGCTGATAACAAATTTGCACTGACTTGCTTTA  
gca ctc aat ttg ctt ttg ctt gtc ctg acg gcg taa aac acg tct atc  
AGTTACGTGCCAGATCAGTTTCACCTAACTGTTTCATCAGACAAGAGGAAG

27556 43 1 0 3 ORF7a-ALTCFSTQFAFACPD55fs  
GAACATACGAGGGCAATTCACCATTTTCATCCTCTAGCTGATAACAAATTT  
gca ctg act tgc ttt agc act caa ttt gct ttt gct tgt cct g  
ACGGCGTAAAACACGTCTATCAGTTACGTGCCAGATCAGTTTCACCTAAAC

27566 59 1 0 3 ORF7a-CFSTQFAFACPDGVKHVYQL58fs  
GGGCAATTCACCATTTTCATCCTCTAGCTGATAACAAATTTGCACTGACTT  
gct tta gca ctc aat ttg ctt ttg ctt gtc ctg acg gcg taa aac acg tct atc agt ta  
CGTGCCAGATCAGTTTCACCTAACTGTTTCATCAGACAAGAGGAAGTTCAA

27913 81 1 0 3 ORF8-LGIITTVAAAFHQECSLQSCTQHQPYPVVD7Y  
TCATAATGAAACTTGTCACGCCTAAACGAACATGAAATTTCTTGTTTTCT  
tag gaa tca tca caa ctg tag ctg cat ttc acc aag aat gta gtt tac agt cat gta ctc aac atc aac cat atg tag ttg  
ATGACCCGTGTCCTATTCACCTTCTATTCTAAATGGTATATTAGAGTAGGAG

28031 42 1 0 3 ORF8-YIRVGARKSAPLIEL46\*  
CCATATGTAGTTGATGACCCGTGTCCTATTCACCTTCTATTCTAAATGGTA  
tat tag agt agg agc tag aaa atc agc acc ttt aat tga att  
GTGCGTGATGAGGCTGGTTCTAAATCACCCATTTCAGTACATCGATATCGG

27696 55 1 0 3 ORF7a-FLIVAAIVFITLCFTLKRK101fs  
AAACTGTTTCATCAGACAAGAGGAAGTTCAAGAAGTTTACTCTCCAATTTT  
tct tat tgt tgc ggc aat agt gtt tat aac act ttg ctt cac act caa aag aaa g  
ACAGAATGATTGAACCTTTCATTAATTGACTTCTATTTGTGCTTTTTAGCCT

27698 55 1 0 3 ORF7a-LIVAAIVFITLCFTLKRKT102fs  
ACTGTTTCATCAGACAAGAGGAAGTTCAAGAAGTTTACTCTCCAATTTTC  
tta ttg ttg cgg caa tag tgt tta taa cac ttt gct tca cac tca aaa gaa aga c

AGAATGATTGAACTTTCATTAATTGACTTCTATTTGTGCTTTTTAGCCTTT

29728 35 1 0 3  
TCTTTAATCAGTGTGTAACATTAGGGAGGACTTGAAAGAGCCACCACATT  
ttc acc gag gcc acg cgg agt acg atc gag tgt ac  
AGTGAACAATGCTAGGGAGAGCTGCCTATATGGAAGAGCCCTAATGTGTAA

27909 60 1 0 3 ORF8-FLGIITTVAAAFHQECSLQSC6del  
AAGATCATAATGAACTTGTACGCCTAAACGAACATGAAATTTCTTGTT  
ttc tta gga atc atc aca act gta gct gca ttt cac caa gaa tgt agt tta cag tca tgt  
ACTCAACATCAACCATATGTAGTTGATGACCCGTGTCCTATTCACTTCTAT

27568 52 1 0 3 ORF7a-FSTQFAFACPDGVKHHVYQ59fs  
GCAATTCACCATTTCATCCTCTAGCTGATAACAAATTTGCACTGACTTGC  
ttt agc act caa ttt gct ttt gct tgt cct gac ggc gta aaa cac gtc tat c  
AGTTACGTGCCAGATCAGTTTCACCTAAACTGTTTCATCAGACAAGAGGAAG

11288 9 75 434 365348 ORF1a-SGF3675del  
GTTGGGTGATGCGTATTATGACATGGTTGGATATGGTTGATACTAGTTTG  
tct ggt ttt  
AAGCTAAAAGACTGTGTTATGTATGCATCAGCTGTAGTGTTACTAATCCTT

29738 23 102 280 5476  
GTGTGTAACATTAGGGAGGACTTGAAAGAGCCACCACATTTTCACCGAGG  
cca cgc gga gta cga tcg agt gt  
ACAGTGAACAATGCTAGGGAGAGCTGCCTATATGGAAGAGCCCTAATGTGT

22287 9 78 54 2097 S-LAL242del  
ATTGGTAGATTTGCCAATAGGTATTAACATCACTAGGTTTCAAACCTTTAC  
ttg ctt tac  
ATAGAAGTTATTTGACTCCTGGTGATTCTTCTTCAGGTTGGACAGCTGGTG

686 9 727 16 2001 ORF1a-KSF141del  
GTAAGAACGGTAATAAAGGAGCTGGTGGCCATAGTTACGGCGCCGATCTA  
aag tca ttt  
GACTTAGGCGACGAGCTTGGCACTGATCCTTATGAAGATTTTCAAGAAAAC

25448 30 2 11 158 ORF3a-EIKDATPSDF19del  
TTTGTTTATGAGAATCTTCACAATTGGAAGCTGTAACCTTGAAGCAAGGTG  
aaa tca agg atg cta ctc ctt cag att ttg  
TTCGCGCTACTGCAACGATACCGATACAAGCCTCACTCCCTTTCGGATGGC

27571 12 30 10 556 ORF7a-STQF60del  
ATTCACCATTTCATCCTCTAGCTGATAACAAATTTGCACTGACTTGCTTT  
agc act caa ttt  
GCTTTTGCTTGTCTTGACGGCGTAAACACGTCTATCAGTTACGTGCCAGA

29738 11 103 9 504  
GTGTGTAACATTAGGGAGGACTTGAAAGAGCCACCACATTTTCACCGAGG  
cca cgc gga gt  
ACGATCGAGTGTACAGTGAACAATGCTAGGGAGAGCTGCCTATATGGAAGA

22299 21 1 6 465 S-RSYLTPGD246N  
GCCAATAGGTATTAACATCACTAGGTTTCAAACCTTTACTTGCTTTACATA

gaa gtt att tga ctc ctg gtg  
ATTCTTCTTCAGGTTGGACAGCTGGTGCTGCAGCTTATTATGTGGGTTATC

21984 9 22 6 306 S-LGV141del  
TAATGTTGTTATTAAAGTCTGTGAATTTCAATTTTGTAATGATCCATTTT  
tgg gtg ttt  
ATTACCACAAAAACAACAAAAGTTGGATGGAAAGTGAGTTCAGAGTTTATT

27887 15 1 6 296 ORF7b-\*44fs  
TTTTGGTTCTCACTTGAAGTGCAGATCATAATGAAACTTGTCACGCCTA  
aac gaa cat gaa att  
TCTTGTTTTCTTAGGAATCATCACAACTGTAGCTGCATTTACCAAGAATG

27887 15 1 6 296 ORF8-MKF1fs  
TTTTGGTTCTCACTTGAAGTGCAGATCATAATGAAACTTGTCACGCCTA  
aac gaa cat gaa att  
TCTTGTTTTCTTAGGAATCATCACAACTGTAGCTGCATTTACCAAGAATG

29729 18 2 6 141  
CTTTAATCAGTGTGTAACATTAGGGAGGACTTGAAAGAGCCACCACATTT  
tca ccg agg cca cgc gga  
GTACGATCGAGTGTACAGTGAACAATGCTAGGGAGAGCTGCCTATATGGAA

29750 7 9 5 74  
AGGGAGGACTTGAAAGAGCCACCACATTTTCACCGAGGCCACGCGGAGTA  
cga tcg a  
GTGTACAGTGAACAATGCTAGGGAGAGCTGCCTATATGGAAGAGCCCTAAT

27677 30 1 5 62 ORF7a-ELYSPIFLIV95del  
TGCCAGATCAGTTTCACCTAAACTGTTTCATCAGACAAGAGGAAGTTCAAG  
aac ttt act ctc caa ttt ttc tta ttg ttg  
CGGCAATAGTGTTTATAACACTTTGCTTCACACTCAAAGAAAGACAGAAT

510 15 388 4 745 ORF1a-GHVMV82del  
ACAGCCCTATGTGTTTCATCAAACGTTTCGGATGCTCGAACTGCACCTCATG  
gtc atg tta tgg ttg  
AGCTGGTAGCAGAACTCGAAGGCATTCAGTACGGTCGTAGTGGTGAGACAC

510 9 300 4 483 ORF1a-GHVM82V  
ACAGCCCTATGTGTTTCATCAAACGTTTCGGATGCTCGAACTGCACCTCATG  
gtc atg tta  
TGGTTGAGCTGGTAGCAGAACTCGAAGGCATTCAGTACGGTCGTAGTGGTG

29760 7 133 4 453  
TGAAAGAGCCACCACATTTTCACCGAGGCCACGCGGAGTACGATCGAGTG  
tac agt g  
AACAATGCTAGGGAGAGCTGCCTATATGGAAGAGCCCTAATGTGTAAAATT

29730 31 18 4 112  
TTTAATCAGTGTGTAACATTAGGGAGGACTTGAAAGAGCCACCACATTTT  
cac cga ggc cac gcg gag tac gat cga gtg t  
ACAGTGAACAATGCTAGGGAGAGCTGCCTATATGGAAGAGCCCTAATGTGT

27674 24 10 4 94 ORF7a-QELYSPIF94del

ACGTGCCAGATCAGTTTCACCTAAACTGTTTCATCAGACAAGAGGAAGTTC  
aag aac ttt act ctc caa ttt ttc  
TTATTGTTGCGGCAATAGTGTTTATAAACACTTTGCTTCACACTCAAAAGAA

29751 12 43 3 320  
GGGAGGACTTGAAAGAGCCACCACATTTTTCACCGAGGCCACGCGGAGTAC  
gat cga gtg tac  
AGTGAACAATGCTAGGGAGAGCTGCCTATATGGAAGAGCCCTAATGTGTAA

29732 32 4 3 62  
TAATCAGTGTGTAACATTAGGGAGGACTTGAAAGAGCCACCACATTTTCA  
ccg agg cca cgc gga gta cga tcg agt gta ca  
GTGAACAATGCTAGGGAGAGCTGCCTATATGGAAGAGCCCTAATGTGTAAA

29759 8 4 3 30  
TTGAAAGAGCCACCACATTTTTCACCGAGGCCACGCGGAGTACGATCGAGT  
gta cag tg  
AACAAATGCTAGGGAGAGCTGCCTATATGGAAGAGCCCTAATGTGTAAAATT

29750 10 33 2 112  
AGGGAGGACTTGAAAGAGCCACCACATTTTTCACCGAGGCCACGCGGAGTA  
cga tcg agt g  
TACAGTGAACAATGCTAGGGAGAGCTGCCTATATGGAAGAGCCCTAATGTG

28242 12 3 2 66 ORF8-VLDF117del  
TGCGTTGTTTCGTTCTATGAAGACTTTTTAGAGTATCATGACGTTTCGTGTT  
gtt tta gat ttc  
ATCTAAACGAACAACTAAAATGTCTGATAATGGACCCCAAAATCAGCGAA

22029 9 2 2 58 S-EFR156del  
ATTTTTGGGTGTTTATTACCACAAAAACAACAAAAGTTGGATGGAAAGTG  
agt tca gag  
TTTATTCTAGTGCGAATAATTGCACTTTTGAATATGTCTCTCAGCCTTTTC

29730 19 20 2 57  
TTTAATCAGTGTGTAACATTAGGGAGGACTTGAAAGAGCCACCACATTTT  
cac cga ggc cac gcg gag t  
ACGATCGAGTGTACAGTGAACAATGCTAGGGAGAGCTGCCTATATGGAAGA

27570 13 4 2 54 ORF7a-FSTQF59fs  
AATTCACCATTTCATCCTCTAGCTGATAACAAATTTGCACTGACTTGCTT  
tag cac tca att t  
GCTTTTGCTTGTCCTGACGGCGTAAACACGTCTATCAGTTACGTGCCAGA

29749 10 11 2 36  
TAGGGAGGACTTGAAAGAGCCACCACATTTTTCACCGAGGCCACGCGGAGT  
acg atc gag t  
GTACAGTGAACAATGCTAGGGAGAGCTGCCTATATGGAAGAGCCCTAATGT

27594 30 4 2 34 ORF7a-CPDGVKHVYQL67\*  
GATAACAAATTTGCACTGACTTGCTTTAGCACTCAATTTGCTTTTGCTTG  
tcc tga cgg cgt aaa aca cgt cta tca gtt  
ACGTGCCAGATCAGTTTCACCTAAACTGTTTCATCAGACAAGAGGAAGTTCA



29741 19 5 2 27  
TGTAACATTAGGGAGGACTTGAAAGAGCCACCACATTTTCACCGAGGCCA  
cgc gga gta cga tcg agt g  
TACAGTGAACAATGCTAGGGAGAGCTGCCTATATGGAAGAGCCCTAATGTG

29747 22 1 2 12  
ATTAGGGAGGACTTGAAAGAGCCACCACATTTTCACCGAGGCCACGCGGA  
gta cga tcg agt gta cag tga a  
CAATGCTAGGGAGAGCTGCCTATATGGAAGAGCCCTAATGTGTAAAATTAA

27751 18 3 1 164 ORF7a-TE\*120del  
TTGTTGCGGCAATAGTGTTTATAACACTTTGCTTCACACTCAAAAGAAAG  
aca gaa tga ttg aac ttt  
CATTAATTGACTTCTATTTGTGCTTTTTAGCCTTTCTGCTATTCCTTGTTT

27751 18 3 1 164 ORF7b-MIELS1fs  
TTGTTGCGGCAATAGTGTTTATAACACTTTGCTTCACACTCAAAAGAAAG  
aca gaa tga ttg aac ttt  
CATTAATTGACTTCTATTTGTGCTTTTTAGCCTTTCTGCTATTCCTTGTTT

21984 12 86 1 156 S-LGVY141del  
TAATGTTGTTATTAAAGTCTGTGAATTTCAATTTTGTAATGATCCATTTT  
tgg gtg ttt att  
ACCACAAAAACAACAAAAGTTGGATGGAAAGTGAGTTCAGAGTTTATTCTA

29738 21 36 1 156  
GTGTGTAACATTAGGGAGGACTTGAAAGAGCCACCACATTTTCACCGAGG  
cca cgc gga gta cga tcg agt  
GTACAGTGAACAATGCTAGGGAGAGCTGCCTATATGGAAGAGCCCTAATGT

29743 18 5 1 112  
TAACATTAGGGAGGACTTGAAAGAGCCACCACATTTTCACCGAGGCCACG  
cgg agt acg atc gag tgt  
ACAGTGAACAATGCTAGGGAGAGCTGCCTATATGGAAGAGCCCTAATGTGT

28900 9 12 1 79 N-RMAG209S  
AGTTCAAGAAATTCAACTCCAGGCAGCAGTAGGGGAACTTCTCCTGCTAG  
aat ggc tgg  
CAATGGCGGTGATGCTGCTCTTGCTTTGCTGCTGCTTGACAGATTGAACCA

29730 30 24 1 63  
TTTAATCAGTGTGTAACATTAGGGAGGACTTGAAAGAGCCACCACATTTT  
cac cga ggc cac gcg gag tac gat cga gtg  
TACAGTGAACAATGCTAGGGAGAGCTGCCTATATGGAAGAGCCCTAATGTG

29741 23 6 1 45  
TGTAACATTAGGGAGGACTTGAAAGAGCCACCACATTTTCACCGAGGCCA  
cgc gga gta cga tcg agt gta ca  
GTGAACAATGCTAGGGAGAGCTGCCTATATGGAAGAGCCCTAATGTGTAAA

27788 9 6 1 32 ORF7b-CFL12del  
ACTCAAAAGAAAGACAGAATGATTGAACTTTCATTAATTGACTTCTATTT  
gtg ctt ttt  
AGCCTTTCTGCTATTCCTTGTTTTAATTATGCTTATTATCTTTTGGTTCTC

29733 15 5 1 21  
AATCAGTGTGTAACATTAGGGAGGACTTGAAAGAGCCACCACATTTTCAC  
cga ggc cac gcg gag  
TACGATCGAGTGTACAGTGAACAATGCTAGGGAGAGCTGCCTATATGGAAG

27712 15 1 1 20 ORF7a-IVFIT107del  
AAGAGGAAGTTCAAGAACTTTACTCTCCAATTTTTCTTATTGTTGCGGCA  
ata gtg ttt ata aca  
CTTTGCTTCACACTCAAAAGAAAGACAGAATGATTGAACTTTCATTAATTG

29752 8 7 1 13  
GGAGGACTTGAAAGAGCCACCACATTTTCACCGAGGCCACGCGGAGTACG  
atc gag tg  
TACAGTGAACAATGCTAGGGAGAGCTGCCTATATGGAAGAGCCCTAATGTG

27764 15 5 1 13 ORF7b-ELSLI3del  
AGTGTTTATAACACTTTGCTTCACACTCAAAAGAAAGACAGAATGATTGA  
act ttc att aat tga  
CTTCTATTTGTGCTTTTTAGCCTTTCTGCTATTCCTTGTTTTAATTATGCT

29734 27 4 1 12  
ATCAGTGTGTAACATTAGGGAGGACTTGAAAGAGCCACCACATTTTCACC  
gag gcc acg cgg agt acg atc gag tgt  
ACAGTGAACAATGCTAGGGAGAGCTGCCTATATGGAAGAGCCCTAATGTGT

29730 18 4 1 11  
TTTAATCAGTGTGTAACATTAGGGAGGACTTGAAAGAGCCACCACATTTT  
cac cga ggc cac gcg gag  
TACGATCGAGTGTACAGTGAACAATGCTAGGGAGAGCTGCCTATATGGAAG

29724 25 2 1 11  
GCAATCTTTAATCAGTGTGTAACATTAGGGAGGACTTGAAAGAGCCACCA  
cat ttt cac cga ggc cac gcg gag t  
ACGATCGAGTGTACAGTGAACAATGCTAGGGAGAGCTGCCTATATGGAAGA

29760 19 3 1 10  
TGAAAGAGCCACCACATTTTCACCGAGGCCACGCGGAGTACGATCGAGTG  
tac agt gaa caa tgc tag g  
GAGAGCTGCCTATATGGAAGAGCCCTAATGTGTAAAATTAATTTTAGTAGT

29733 30 2 1 9  
AATCAGTGTGTAACATTAGGGAGGACTTGAAAGAGCCACCACATTTTCAC  
cga ggc cac gcg gag tac gat cga gtg tac  
AGTGAACAATGCTAGGGAGAGCTGCCTATATGGAAGAGCCCTAATGTGTAA

29750 17 2 1 9  
AGGGAGGACTTGAAAGAGCCACCACATTTTCACCGAGGCCACGCGGAGTA  
cga tcg agt gta cag tg  
AACAATGCTAGGGAGAGCTGCCTATATGGAAGAGCCCTAATGTGTAAAATT

29813 9 1 1 9  
AGTGAACAATGCTAGGGAGAGCTGCCTATATGGAAGAGCCCTAATGTGTA  
aaa tta att

TTAGTAGTGCTATCCCCATGTGATTTTAATAGCTTCTTAGGAGAATGACAA

29764 7 5 1 7  
AGAGCCACCACATTTTCACCGAGGCCACGCGGAGTACGATCGAGTGTACA  
gtg aac a  
ATGCTAGGGAGAGCTGCCTATATGGAAGAGCCCTAATGTGTAAAATTAATT

22293 12 5 1 7 S-LHRS244del  
AGATTTGCCAATAGGTATTAACATCACTAGGTTTCAAACCTTTACTTGCTT  
tac ata gaa gtt  
ATTTGACTCCTGGTGATTCTTCTTCAGGTTGGACAGCTGGTGCTGCAGCTT

23585 15 3 1 7 S-QTQTN675del  
ACTCATATGAGTGTGACATACCCATTGGTGCAGGTATATGCGCTAGTTAT  
cag act cag act aat  
TCTCCTCGGCGGGCACGTAGTGTAGCTAGTCAATCCATCATTGCCTACACT

3876 18 2 1 3 ORF1a-AEIPKE1204del  
TTCAAGCTTTTTTGAAATGAAGAGTGAAAAGCAAGTTGAACAAAAGATCG  
ctg aga ttc cta aag agg  
AAGTTAAGCCATTTATAACTGAAAGTAAACCTTCAGTTGAACAGAGAAAAC

27602 25 1 1 3 ORF7a-GVKHVVYQLR70fs  
ATTTGCACTGACTTGCTTTAGCACTCAATTTGCTTTTGCTTGTCTGACG  
gcg taa aac acg tct atc agt tac g  
TGCCAGATCAGTTTCACCTAAACTGTTTCATCAGACAAGAGGAAGTTCAAGA

29738 14 32 0 403  
GTGTGTAACATTAGGGAGGACTTGAAAGAGCCACCACATTTTCACCGAGG  
cca cgc gga gta cg  
ATCGAGTGTACAGTGAACAATGCTAGGGAGAGCTGCCTATATGGAAGAGCC

29767 7 2 0 209  
GCCACCACATTTTCACCGAGGCCACGCGGAGTACGATCGAGTGTACAGTG  
aac aat g  
CTAGGGAGAGCTGCCTATATGGAAGAGCCCTAATGTGTAAAATTAATTTTA

29732 29 2 0 200  
TAATCAGTGTGTAACATTAGGGAGGACTTGAAAGAGCCACCACATTTTCA  
ccg agg cca cgc gga gta cga tcg agt gt  
ACAGTGAACAATGCTAGGGAGAGCTGCCTATATGGAAGAGCCCTAATGTGT

29736 24 23 0 183  
CAGTGTGTAACATTAGGGAGGACTTGAAAGAGCCACCACATTTTCACCGA  
ggc cac gcg gag tac gat cga gtg  
TACAGTGAACAATGCTAGGGAGAGCTGCCTATATGGAAGAGCCCTAATGTG

27266 27 71 0 125 ORF6-FKVSINLD22del  
TGACTTTCAGGTTACTATAGCAGAGATATTACTAATTATTATGAGGACTT  
tta aag ttt cca ttt gga atc ttg att  
ACATCATAAACCTCATAATTAATAATTTATCTAAGTCACTAACTGAGAATA

29738 22 7 0 120  
GTGTGTAACATTAGGGAGGACTTGAAAGAGCCACCACATTTTCACCGAGG

cca cgc gga gta cga tcg agt g  
TACAGTGAACAATGCTAGGGAGAGCTGCCTATATGGAAGAGCCCTAATGTG

29731 8 38 0 118  
TTAATCAGTGTGTAACATTAGGGAGGACTTGAAAGAGCCACCACATTTTC  
acc gag gc  
CACGCGGAGTACGATCGAGTGTACAGTGAACAATGCTAGGGAGAGCTGCCT

29762 15 2 0 105  
AAAGAGCCACCACATTTTCACCGAGGCCACGCGGAGTACGATCGAGTGTA  
cag tga aca atg cta  
GGGAGAGCTGCCTATATGGAAGAGCCCTAATGTGTAAAATTAATTTTAGTA

26164 8 12 0 103 ORF3a-PVM258fs  
AAGAACATGTCCAAATTCACACAATCGACGGTTCATCCGGAGTTGTTAAT  
cca gta at  
GGAACCAATTTATGATGAACCGACGACGACTACTAGCGTGCCTTTGTAAGC

26159 11 3 0 103 ORF3a-VNPV256fs  
GCCTGAAGAACATGTCCAAATTCACACAATCGACGGTTCATCCGGAGTTG  
tta atc cag ta  
ATGGAACCAATTTATGATGAACCGACGACGACTACTAGCGTGCCTTTGTAA

27757 7 1 0 99 ORF7a-\*122del  
CGGCAATAGTGTTTATAACACTTTGCTTCACACTCAAAGAAAGACAGAA  
tga ttg a  
ACTTTCATTAATTGACTTCTATTTGTGCTTTTTAGCCTTCTGCTATTCCT

27757 7 1 0 99 ORF7b-MIE1fs  
CGGCAATAGTGTTTATAACACTTTGCTTCACACTCAAAGAAAGACAGAA  
tga ttg a  
ACTTTCATTAATTGACTTCTATTTGTGCTTTTTAGCCTTCTGCTATTCCT

27571 16 5 0 97 ORF7a-STQFAF60fs  
ATTCACCATTTTCATCCTCTAGCTGATAACAAATTTGCACTGACTTGCTTT  
agc act caa ttt gct t  
TTGCTTGTCTGACGGCGTAAAACACGTCTATCAGTTACGTGCCAGATCAG

29762 11 1 0 91  
AAAGAGCCACCACATTTTCACCGAGGCCACGCGGAGTACGATCGAGTGTA  
cag tga aca at  
GCTAGGGAGAGCTGCCTATATGGAAGAGCCCTAATGTGTAAAATTAATTTT

28090 7 31 0 90 ORF8-GSK66fs  
AGGAGCTAGAAAATCAGCACCTTTAATTGAATTGTGCGTGGATGAGGCTG  
gtt cta a  
ATCACCCATTCAGTACATCGATATCGGTAATTATACAGTTTCCTGTTTACC

28882 18 13 0 86 N-GTSPAR204del  
TCATCACGTAGTCGCAACAGTTCAAGAAATTCAACTCCAGGCAGCAGTAG  
ggg aac ttc tcc tgc tag  
AATGGCTGGCAATGGCGGTGATGCTGCTCTTGCTTTGCTGCTGCTTGACAG

6656 24 4 0 79 ORF1a-NSVPWDTI2131del

CTAGAGTATTAGGTTTGAAAACCCTTGCTACTCATGGTTTAGCTGCTGTT  
aat agt gtc cct tgg gat act ata  
GCTAATTATGCTAAGCCTTTTCTTAACAAAGTTGTTAGTACAACACTACTAAC

516 9 45 0 77 ORF1a-VMV84del  
CTATGTGTTTCATCAAACGTTTCGGATGCTCGAACTGCACCTCATGGTCATG  
tta tgg ttg  
AGCTGGTAGCAGAACTCGAAGGCATTCAGTACGGTCGTAGTGGTGAGACAC

22286 7 4 0 75 S-LAL242fs  
CATTGGTAGATTTGCCAATAGGTATTAACATCACTAGGTTTCAAACCTTA  
ctt gct t  
TACATAGAAGTTATTTGACTCCTGGTGATTCTTCTTCAGGTTGGACAGCTG

29767 10 13 0 73  
GCCACCACATTTTCACCGAGGCCACGCGGAGTACGATCGAGTGTACAGTG  
aac aat gct a  
GGGAGAGCTGCCTATATGGAAGAGCCCTAATGTGTAAAATTAATTTTAGTA

11287 9 7 0 73 ORF1a-LSG3674del  
AGTTGGGTGATGCGTATTATGACATGGTTGGATATGGTTGATACTAGTTT  
gtc tgg ttt  
TAAGCTAAAAGACTGTGTTATGTATGCATCAGCTGTAGTGTTACTAATCCT

27626 13 4 0 73 ORF7a-RARSV78fs  
TCAATTTGCTTTTGCTTGTCTGACGGCGTAAAACACGTCTATCAGTTAC  
gtg cca gat cag t  
TTCACCTAAACTGTTTCATCAGACAAGAGGAAGTTCAAGAACTTTACTCTCC

6659 27 15 0 69 ORF1a-SVPWDTIAN2132del  
GAGTATTAGGTTTGAAAACCCTTGCTACTCATGGTTTAGCTGCTGTTAAT  
agt gtc cct tgg gat act ata gct aat  
TATGCTAAGCCTTTTCTTAACAAAGTTGTTAGTACAACACTACTAACATAGTT

26158 12 21 0 68 ORF3a-VNPV256del  
AGCCTGAAGAACATGTCCAAATTCACACAATCGACGGTTCATCCGGAGTT  
gtt aat cca gta  
ATGGAACCAATTTATGATGAACCGACGACGACTACTAGCGTGCCTTTGTAA

28146 16 1 0 68 ORF8-PFTINC85fs  
AATCACCCATTCAGTACATCGATATCGGTAATTATACAGTTTCCTGTTTA  
cct ttt aca att aat t  
GCCAGGAACCTAAATTGGGTAGTCTTGTAGTGCGTTGTTTCGTTCTATGAAG

27600 18 1 0 62 ORF7a-GVKHVV70del  
AAATTTGCACTGACTTGCTTTAGCACTCAATTTGCTTTTGCTTGTCTCTGA  
cgg cgt aaa aca cgt cta  
TCAGTTACGTGCCAGATCAGTTTCACCTAAACTGTTTCATCAGACAAGAGGA

27575 23 1 0 59 ORF7a-TQFAFACP61fs  
ACCATTTATCCTCTAGCTGATAACAAATTTGCACTGACTTGCTTTAGCA  
ctc aat ttg ctt ttg ctt gtc ct  
GACGGCGTAAAACACGTCTATCAGTTACGTGCCAGATCAGTTTCACCTAAA

27571 18 25 0 50 ORF7a-STQFAF60del  
ATTCACCATTTTCATCCTCTAGCTGATAACAAATTTGCACTGACTTGCTTT  
agc act caa ttt gct ttt  
GCTTGTCTGACGGCGTAAAACACGTCTATCAGTTACGTGCCAGATCAGTT

3333 12 15 0 50 ORF1a-IEVN1023del  
TGAGGTTCAACCTCAATTAGAGATGGAACCTTACACCAGTTGTTTCAGACTA  
ttg aag tga ata  
GTTTTAGTGGTTATTTAAACTTACTGACAATGTATACATTA AAAAATGCAG

27696 7 17 0 49 ORF7a-FLI101fs  
AAACTGTTTCATCAGACAAGAGGAAGTTCAAGAACTTTACTCTCCAATTTT  
tct tat t  
GTTGCGGCAATAGTGTTTATAACACTTTGCTTCACACTCAAAAGAAAGACA

25423 9 25 0 48 ORF3a-GTV11del  
CATTACACATAAACGAACTTATGGATTTGTTTATGAGAATCTTCACAATT  
gga act gta  
ACTTTGAAGCAAGGTGAAATCAAGGATGCTACTCCTTCAGATTTTGTTCGC

29753 9 7 0 48  
GAGGACTTGAAAGAGCCACCACATTTTCACCGAGGCCACGCGGAGTACGA  
tcg agt gta  
CAGTGAACAATGCTAGGGAGAGCTGCCTATATGGAAGAGCCCTAATGTGTA

27574 17 2 0 46 ORF7a-TQFAFA61fs  
CACCATTTTCATCCTCTAGCTGATAACAAATTTGCACTGACTTGCTTTAGC  
act caa ttt gct ttt gc  
TTGTCCTGACGGCGTAAAACACGTCTATCAGTTACGTGCCAGATCAGTTTC

29739 16 5 0 43  
TGTGTAACATTAGGGAGGACTTGAAAGAGCCACCACATTTTCACCGAGGC  
cac gcg gag tac gat c  
GAGTGTACAGTGAACAATGCTAGGGAGAGCTGCCTATATGGAAGAGCCCTA

27561 16 2 0 42 ORF7a-LTCFST56fs  
TACGAGGGCAATTCACCATTTTCATCCTCTAGCTGATAACAAATTTGCACT  
gac ttg ctt tag cac t  
CAATTTGCTTTTGTCTGACGGCGTAAAACACGTCTATCAGTTACGT

27566 28 4 0 41 ORF7a-CFSTQFAFAC58fs  
GGGCAATTCACCATTTTCATCCTCTAGCTGATAACAAATTTGCACTGACTT  
gct tta gca ctc aat ttg ctt ttg ctt g  
TCCTGACGGCGTAAAACACGTCTATCAGTTACGTGCCAGATCAGTTTCACC

27877 10 1 0 41 ORF7b-CHA\*41fs  
GCTTATTATCTTTTGGTTCTCACTTGAAGATCATAATGAACTT  
gtc acg cct a  
AACGAACATGAAATTTCTTGTTTTCTTAGGAATCATCACAACGTAGCTGC

26485 8 1 0 40  
ATCTGAATTCTTCTAGAGTTCCTGATCTTCTGGTCTAAACGAACTAAATA  
tta tat ta  
GTTTTTCTGTTTGGAACTTTAATTTTAGCCATGGCAGATTCCAACGGTACT

26162 9 20 0 39 ORF3a-NPV257del  
TGAAGAACATGTCCAAATTCACACAATCGACGGTTCATCCGGAGTTGTTA  
atc cag taa  
TGGAACCAATTTATGATGAACCGACGACGACTACTAGCGTGCCTTTGTAAG

27428 9 1 0 37 ORF7a-LATC12R  
GATTGATTAAACGAACATGAAAATTATTCTTTTCTTGGCACTGATAACAC  
tcg cta ctt  
GTGAGCTTTATCACTACCAAGAGTGTGTTAGAGGTACAACAGTACTTTTAA

27555 24 21 0 36 ORF7a-FALTCESTQ54L  
GGAACATACGAGGGCAATTCACCATTTCATCCTCTAGCTGATAACAAATT  
tgc act gac ttg ctt tag cac tca  
ATTTGCTTTTGGCTTGTCTGACGGCGTAAAACACGTCTATCAGTTACGTGC

27570 19 1 0 36 ORF7a-FSTQFAF59fs  
AATTCACCATTTCATCCTCTAGCTGATAACAAATTTGCACTGACTTGCTT  
tag cac tca att tgc ttt t  
GCTTGTCTGACGGCGTAAAACACGTCTATCAGTTACGTGCCAGATCAGTT

27683 12 17 0 35 ORF7a-YSPI97del  
ATCAGTTTCACCTAAACTGTTTCATCAGACAAGAGGAAGTTCAAGAACTTT  
act etc caa ttt  
TTCTTATTGTTGCGGCAATAGTGTTTATAACACTTTGCTTCACACTCAAAA

21974 21 6 0 35 S-DPFLGVY138del  
ATAACGCTACTAATGTTGTTATTAAAGTCTGTGAATTTCAATTTTGTAAT  
gat cca ttt ttg ggt gtt tat  
TACCACAAAAACAACAAAAGTTGGATGGAAAGTGAGTTCAGAGTTTATTCT

29745 15 5 0 32  
ACATTAGGGAGGACTTGAAAGAGCCACCACATTTTCACCGAGGCCACGCG  
gag tac gat cga gtg  
TACAGTGAACAATGCTAGGGAGAGCTGCCTATATGGAAGAGCCCTAATGTG

28230 26 2 0 32 ORF8-DVRVVLDFI113fs  
GTAGTCTTGTAGTGCGTTGTTTCGTTCTATGAAGACTTTTATAGAGTATCAT  
gac gtt cgt gtt gtt tta gat ttc at  
CTAAACGAACAACTAAAATGTCTGATAATGGACCCCAAAATCAGCGAAAT

29738 29 16 0 31  
GTGTGTAACATTAGGGAGGACTTGAAAGAGCCACCACATTTTCACCGAGG  
cca cgc gga gta cga tcg agt gta cag tg  
AACAATGCTAGGGAGAGCTGCCTATATGGAAGAGCCCTAATGTGTAAAATT

27629 11 3 0 31 ORF7a-ARSV79fs  
ATTTGCTTTTGGCTTGTCTGACGGCGTAAAACACGTCTATCAGTTACGTG  
cca gat cag tt  
TCACCTAACTGTTTCATCAGACAAGAGGAAGTTCAAGAACTTTACTCTCCA

27694 9 14 0 30 ORF7a-FLI101del  
CTAAACTGTTTCATCAGACAAGAGGAAGTTCAAGAACTTTACTCTCCAATT  
ttt ctt att

GTTGCGGCAATAGTGTTTATAACACTTTGCTTCACACTCAAAAGAAAGACA

25424 12 11 0 30 ORF3a-GTVTL11V  
ATTACACATAAACGAACTTATGGATTTGTTTATGAGAATCTTCACAATTG  
gaa ctg taa ctt  
TGAAGCAAGGTGAAATCAAGGATGCTACTCCTTCAGATTTTGTTCGCGCTA

25438 18 6 0 30 ORF3a-KQGEIK16del  
AACTTATGGATTTGTTTATGAGAATCTTCACAATTGGAAGTGAAGTTTG  
aag caa ggt gaa atc aag  
GATGCTACTCCTTCAGATTTTGTTCGCGCTACTGCAACGATACCGATACAA

21985 9 11 0 29 S-LGVY141F  
AATGTTGTTATTAAAGTCTGTGAATTTCAATTTTGTAATGATCCATTTTT  
ggg tgt tta  
TTACCACAAAAACAACAAAAGTTGGATGGAAAGTGAGTTCAGAGTTTATTC

29577 8 1 0 29 ORF10-FAF7fs  
GGCCTAAACTCATGCAGACCACACAAGGCAGATGGGCTATATAAACGTTT  
tcg ctt tt  
CCGTTTACGATATATAGTCTACTCTTGTGCAGAATGAATTCTCGTAACTAC

28150 12 1 0 29 ORF8-FTIN86del  
ACCCATTCAGTACATCGATATCGGTAATTATACAGTTTCCTGTTTACCTT  
tta caa tta att  
GCCAGGAACCTAAATTGGGTAGTCTTGTAGTGCGTTGTTTCGTTCTATGAAG

28144 8 1 0 27 ORF8-LPF84fs  
TAAATCACCCATTCAGTACATCGATATCGGTAATTATACAGTTTCCTGTT  
tac ctt tt  
ACAATTAATTGCCAGGAACCTAAATTGGGTAGTCTTGTAGTGCGTTGTTTCG

22286 15 2 0 26 S-LALHR242del  
CATTGGTAGATTTGCCAATAGGTATTAACATCACTAGGTTTCAAACCTTA  
ctt gct tta cat aga  
AGTTATTTGACTCCTGGTGATTCTTCTTCAGGTTGGACAGCTGGTGCTGCA

509 9 8 0 25 ORF1a-GHV82del  
AACAGCCCTATGTGTTTCATCAAACGTTTCGGATGCTCGAACTGCACCTCAT  
ggt cat gtt  
ATGGTTGAGCTGGTAGCAGAACTCGAAGGCATTTCAGTACGGTCGTAGTGGT

29734 29 3 0 25  
ATCAGTGTGTAACATTAGGGAGGACTTGAAAGAGCCACCACATTTTCACC  
gag gcc acg cgg agt acg atc gag tgt ac  
AGTGAACAATGCTAGGGAGAGCTGCCTATATGGAAGAGCCCTAATGTGTAA

29736 14 13 0 24  
CAGTGTGTAACATTAGGGAGGACTTGAAAGAGCCACCACATTTTCACCGA  
ggc cac gcg gag ta  
CGATCGAGTGTACAGTGAACAATGCTAGGGAGAGCTGCCTATATGGAAGAG

28242 10 10 0 24 ORF8-VLDF117fs  
TGCGTTGTTTCGTTCTATGAAGACTTTTTAGAGTATCATGACGTTTCGTGTT



gtt tta gat t  
TCATCTAAACGAACAAACTAAAATGTCTGATAATGGACCCCCAAAATCAGCG

28245 8 9 0 24 ORF8-LDF118fs  
GTTGTTTCGTTCTATGAAGACTTTTTAGAGTATCATGACGTTTCGTGTTGTT  
tta gat tt  
CATCTAAACGAACAAACTAAAATGTCTGATAATGGACCCCCAAAATCAGCGA

27570 9 6 0 24 ORF7a-FSTQ59L  
AATTCACCATTTCATCCTCTAGCTGATAACAAATTTGCACTGACTTGCTT  
tag cac tca  
ATTTGCTTTTGCTTGTCTGACGGCGTAAAACACGTCTATCAGTTACGTGC

21762 9 1 0 24 S-AIH67del  
AACTCAGGACTTGTTCTTACCTTTCTTTTCCAATGTTACTTGGTTCCATG  
cta tac atg  
TCTCTGGGACCAATGGTACTAAGAGGTTTGATAACCCTGTCCTACCATTTA

28881 9 12 0 23 N-RGTS203T  
CTCATCACGTAGTCGCAACAGTTCAAGAAATTCAACTCCAGGCAGCAGTA  
ggg gaa ctt  
CTCCTGCTAGAAATGGCTGGCAATGGCGGTGATGCTGCTCTTGCTTTGCTGC

27571 17 13 0 22 ORF7a-STQFAF60fs  
ATTCACCATTTCATCCTCTAGCTGATAACAAATTTGCACTGACTTGCTTT  
agc act caa ttt gct tt  
TGCTTGTCCTGACGGCGTAAAACACGTCTATCAGTTACGTGCCAGATCAGT

27626 18 1 0 22 ORF7a-RARSVS78del  
TCAATTTGCTTTTGCTTGTCTGACGGCGTAAAACACGTCTATCAGTTAC  
gtg cca gat cag ttt cac  
CTAAACTGTTTCATCAGACAAGAGGAAGTTCAAGAACTTTACTCTCCAATTT

27677 9 9 0 21 ORF7a-ELYS95A  
TGCCAGATCAGTTTCACCTAAACTGTTTCATCAGACAAGAGGAAGTTCAAG  
aac ttt act  
CTCCAATTTTTCTTATTGTTGCGGCAATAGTGTTTATAACACTTTGCTTCA

28068 8 2 0 20 ORF8-ELC59fs  
ATTCTAAATGGTATATTAGAGTAGGAGCTAGAAAATCAGCACCTTTAATT  
gaa ttg tg  
CGTGGATGAGGCTGGTTCTAAATCACCCATTTCAGTACATCGATATCGGTAA

11512 9 14 0 19 ORF1a-TVM3750del  
ATGTGGGCTCTTATAATCTCTGTTACTTCTAACTACTCAGGTGTAGTTAC  
aac tgt cat  
GTTTTTGGCCAGAGGTATTGTTTTTATGTGTGTTGAGTATTGCCCTATTTT

29739 10 4 0 19  
TGTGTAACATTAGGGAGGACTTGAAAGAGCCACCACATTTTCACCGAGGC  
cac gcg gag t  
ACGATCGAGTGTACAGTGAACAATGCTAGGGAGAGCTGCCTATATGGAAGA

29578 11 2 0 19 ORF10-FAFP7fs

GCCTAAACTCATGCAGACCACACAAGGCAGATGGGCTATATAAACGTTTT  
cgc ttt tcc gt  
TTACGATATATAGTCTACTCTTGTGCAGAATGAATTCTCGTAACTACATAG

27689 9 11 0 18 ORF7a-PIF99del  
TTCACCTAAACTGTTTCATCAGACAAGAGGAAGTTCAAGAACTTTACTCTC  
caa ttt ttc  
TTATTGTTGCGGCAATAGTGTTTATAAACACTTTGCTTCACACTCAAAAGAA

29739 24 8 0 18  
TGTGTAACATTAGGGAGGACTTGAAAGAGCCACCACATTTTCACCGAGGC  
cac gcg gag tac gat cga gtg tac  
AGTGAACAATGCTAGGGAGAGCTGCCTATATGGAAGAGCCCTAATGTGTAA

27797 7 6 0 18 ORF7b-LAF14fs  
AAAGACAGAATGATTGAACTTTCATTAATTGACTTCTATTTGTGCTTTTT  
agc ctt t  
CTGCTATTCCTTGTTTTAATTATGCTTATTATCTTTTGGTTCTCACTTGAA

27266 28 5 0 18 ORF6-FKVSINLDY22fs  
TGACTTTCAGGTTACTATAGCAGAGATATTACTAATTATTATGAGGACTT  
tta aag ttt cca ttt gga atc ttg att a  
CATCATAAACCTCATAATTAAAAATTTATCTAAGTCACTAACTGAGAATAA

27677 7 1 0 18 ORF7a-ELY95fs  
TGCCAGATCAGTTTCACCTAAACTGTTTCATCAGACAAGAGGAAGTTCAAG  
aac ttt a  
CTCTCCAATTTTTCTTATTGTTGCGGCAATAGTGTTTATAAACACTTTGCTT

25423 15 9 0 17 ORF3a-GTVTL11del  
CATTACACATAAACGAACCTTATGGATTTGTTTATGAGAATCTTCACAATT  
gga act gta act ttg  
AAGCAAGGTGAAATCAAGGATGCTACTCCTTCAGATTTTGTTCGCGCTACT

28877 12 8 0 17 N-RGTS203del  
GTTCTCATCACGTAGTCGCAACAGTTCAAGAAATTCAACTCCAGGCAGC  
agt agg gga act  
TCTCCTGCTAGAATGGCTGGCAATGGCGGTGATGCTGCTCTTGCTTTGCTG

28077 7 6 0 16 ORF8-VDE62fs  
GGTATATTAGAGTAGGAGCTAGAAAATCAGCACCTTTAATTGAATTGTGC  
gtg gat g  
AGGCTGGTTCTAAATCACCCATTCAGTACATCGATATCGGTAATTATACAG

29739 12 3 0 16  
TGTGTAACATTAGGGAGGACTTGAAAGAGCCACCACATTTTCACCGAGGC  
cac gcg gag tac  
GATCGAGTGTACAGTGAACAATGCTAGGGAGAGCTGCCTATATGGAAGAGC

25430 18 2 0 16 ORF3a-VTLKQG13del  
CATAAACGAACCTTATGGATTTGTTTATGAGAATCTTCACAATTGGAAGTG  
taa ctt tga agc aag gtg  
AAATCAAGGATGCTACTCCTTCAGATTTTGTTCGCGCTACTGCAACGATAC

3335 15 9 0 15 ORF1a-EVNSF1024del  
AGGTTCAACCTCAATTAGAGATGGAACCTTACACCAGTTGTTTCAGACTATT  
gaa gtg aat agt ttt  
AGTGGTTATTTAAAACTTACTGACAATGTATACATTAAAAATGCAGACATT

27923 8 3 0 15 ORF8-ITT10fs  
ACTTGTCACGCCTAAACGAACATGAAATTTCTTGTTTTCTTAGGAATCAT  
cac aac tg  
TAGCTGCATTTACCAAGAATGTAGTTTACAGTCATGTACTCAACATCAAC

25433 21 3 0 15 ORF3a-TLKQGEI14del  
AAACGAACTTATGGATTTGTTTATGAGAATCTTCACAATTGGAAGTGTAA  
ctt tga agc aag gtg aaa tca  
AGGATGCTACTCCTTCAGATTTTGTTCGCGCTACTGCAACGATACCGATAC

27933 20 3 0 15 ORF8-AAFHQEC14fs  
CCTAAACGAACATGAAATTTCTTGTTTTCTTAGGAATCATCACAAGTGTAA  
gct gca ttt cac caa gaa tg  
TAGTTTACAGTCATGTACTCAACATCAACCATATGTAGTTGATGACCCGTG

27957 7 3 0 15 ORF8-LQS22fs  
TTTTCTTAGGAATCATCACAAGTGTAGCTGCATTTACCAAGAATGTAGT  
tta cag t  
CATGTACTCAACATCAACCATATGTAGTTGATGACCCGTGTCCTATTCACT

27269 22 1 0 15 ORF6-KVSIWNLD23fs  
CTTTCAGGTTACTATAGCAGAGATATTACTAATTATTATGAGGACTTTTA  
aag ttt cca ttt gga atc ttg a  
TTACATCATAAACCTCATAATTAAAAATTTATCTAAGTCACTAACTGAGAA

3900 9 1 0 15 ORF1a-KPF1212del  
TGAAAAGCAAGTTGAACAAAAGATCGCTGAGATTCCTAAAGAGGAAGTTA  
agc cat tta  
TAACTGAAAGTAAACCTTCAGTTGAACAGAGAAAACAAGATGATAAGAAAA

25471 9 1 0 15 ORF3a-DFV27del  
TTGGAAGTGAAGTGAAGCAAGGTGAAATCAAGGATGCTACTCCTTCA  
gat ttt gtt  
CGCGCTACTGCAACGATACCGATACAAGCCTCACTCCCTTTTCGGATGGCTT

27683 14 9 0 14 ORF7a-YSPIF97fs  
ATCAGTTTCACCTAAACTGTTTCATCAGACAAGAGGAAGTTCAAGAACTTT  
act ctc caa ttt tt  
CTTATTGTTGCGGCAATAGTGTTTATAACACTTTGCTTCACACTCAAAAGA

27688 11 7 0 14 ORF7a-PIFL99fs  
TTTCACCTAAACTGTTTCATCAGACAAGAGGAAGTTCAAGAACTTTACTCT  
cca att ttt ct  
TATTGTTGCGGCAATAGTGTTTATAACACTTTGCTTCACACTCAAAAGAAA

27267 27 7 0 14 ORF6-KVSIWNLDY23del  
GACTTTCAGGTTACTATAGCAGAGATATTACTAATTATTATGAGGACTTT  
taa agt ttc cat ttg gaa tct tga tta  
CATCATAAACCTCATAATTAAAAATTTATCTAAGTCACTAACTGAGAATAA

3549 9 6 0 14 ORF1a-GPLK1095E  
TACTAACAAATGCCATGCAAGTTGAATCTGATGATTACATAGCTACTAATG  
gac cac tta  
AAGTGGGTGGTAGTTGTGTTTTAAGCGGACACAATCTTGCTAAACACTGTC

29754 9 1 0 14  
AGGACTTGAAAGAGCCACCACATTTTCACCGAGGCCACGCGGAGTACGAT  
cga gtg tac  
AGTGAACAATGCTAGGGAGAGCTGCCTATATGGAAGAGCCCTAATGTGTAA

27752 12 9 0 13 ORF7a-TE\*120fs  
TGTTGCGGCAATAGTGTTTATAACACTTTGCTTCACACTCAAAAGAAAGA  
cag aat gat tga  
ACTTTCATTAATTGACTTCTATTTGTGCTTTTTAGCCTTTCTGCTATTCCT

27752 12 9 0 13 ORF7b-MIE1fs  
TGTTGCGGCAATAGTGTTTATAACACTTTGCTTCACACTCAAAAGAAAGA  
cag aat gat tga  
ACTTTCATTAATTGACTTCTATTTGTGCTTTTTAGCCTTTCTGCTATTCCT

8602 12 5 0 13 ORF1a-FLFV2780del  
GGTAAAATTGTTAATAATTGGTTGAAGCAGTTAATTAAAGTTACACTTGT  
gtt cct ttt tgt  
TGCTGCTATTTTCTATTTAATAACACCTGTTTCATGTCATGTCTAAACATAC

27682 18 5 0 13 ORF7a-YSPIFL97del  
GATCAGTTTCACCTAAACTGTTTCATCAGACAAGAGGAAGTTCAAGAACTT  
tac tct cca att ttt ctt  
ATTGTTGCGGCAATAGTGTTTATAACACTTTGCTTCACACTCAAAAGAAAG

27787 10 4 0 13 ORF7b-LCFL11fs  
CACTCAAAAGAAAGACAGAATGATTGAACTTTCATTAATTGACTTCTATT  
tgt gct ttt t  
AGCCTTTCTGCTATTCCTTGTTTTAATTATGCTTATTATCTTTTGGTTCTC

27683 11 3 0 13 ORF7a-YSPI97fs  
ATCAGTTTCACCTAAACTGTTTCATCAGACAAGAGGAAGTTCAAGAACTTT  
act ctc caa tt  
TTTCTTATTGTTGCGGCAATAGTGTTTATAACACTTTGCTTCACACTCAAA

29737 23 3 0 13  
AGTGTGTAACATTAGGGAGGACTTGAAAGAGCCACCACATTTTCACCGAG  
gcc acg cgg agt acg atc gag tg  
TACAGTGAACAATGCTAGGGAGAGCTGCCTATATGGAAGAGCCCTAATGTG

26158 24 8 0 12 ORF3a-VNPVMEPI256del  
AGCCTGAAGAACATGTCCAAATTCACACAATCGACGGTTCATCCGGAGTT  
gtt aat cca gta atg gaa cca att  
TATGATGAACCGACGACGACTACTAGCGTGCCTTTGTAAGCACAAGCTGAT

27210 15 6 0 12 ORF6-HLVDF3del  
GCAGTGACAATATTGCTTTGCTTGTACAGTAAGTGACAACAGATGTTTCA  
tct cgt tga ctt tca

GGTTACTATAGCAGAGATATTACTAATTATTATGAGGACTTTTAAAGTTTC

29749 17 5 0 12  
TAGGGAGGACTTGAAAGAGCCACCACATTTTCACCGAGGCCACGCGGAGT  
acg atc gag tgt aca gt  
GAACAATGCTAGGGAGAGCTGCCTATATGGAAGAGCCCTAATGTGTAAAAT

27741 10 3 0 12 ORF7a-LKRK116fs  
ATTTTTCTTATTGTTGCGGCAATAGTGTTTATAACACTTTGCTTCACACT  
caa aag aaa g  
ACAGAATGATTGAACTTTCATTAATTGACTTCTATTTGTGCTTTTTAGCCT

29737 21 3 0 12  
AGTGTGTAACATTAGGGAGGACTTGAAAGAGCCACCACATTTTCACCGAG  
gcc acg cgg agt acg atc gag  
TGTACAGTGAACAATGCTAGGGAGAGCTGCCTATATGGAAGAGCCCTAATG

28090 22 3 0 12 ORF8-GSKSPIQY66fs  
AGGAGCTAGAAAATCAGCACCTTTAATTGAATTGTGCGTGGATGAGGCTG  
gtt cta aat cac cca ttc agt a  
CATCGATATCGGTAATTATACAGTTTCCTGTTTACCTTTTACAATTAATTG

27724 15 2 0 12 ORF7a-TLCFT111del  
AAGAACTTTACTCTCCAATTTTTCTTATTGTTGCGGCAATAGTGTTTATA  
aca ctt tgc ttc aca  
CTCAAAAGAAAGACAGAATGATTGAACTTTCATTAATTGACTTCTATTTGT

29579 7 2 0 12 ORF10-AFP8fs  
CCTAAACTCATGCAGACCACACAAGGCAGATGGGCTATATAAACGTTTTTC  
gct ttt c  
CGTTTACGATATATAGTCTACTCTTGTGCAGAATGAATTCTCGTAACTACA

25436 21 1 0 12 ORF3a-LKQGEIKD15Y  
CGAACTTATGGATTTGTTTATGAGAATCTTCACAATTGGAAGTGTAACTT  
tga agc aag gtg aaa tca agg  
ATGCTACTCCTTCAGATTTTGTTCGCGCTACTGCAACGATACCGATACAAG

21976 21 11 0 11 S-PFLGVYY139del  
AACGCTACTAATGTTGTTATTAAGTCTGTGAATTTCAATTTTGTAATGA  
tcc att ttt ggg tgt tta tta  
CCACAAAAACAACAAAAGTTGGATGGAAAGTGAGTTCAGAGTTTATTCTAG

28065 8 7 0 11 ORF8-IEL58fs  
TCTATTCTAAATGGTATATTAGAGTAGGAGCTAGAAAATCAGCACCTTTA  
att gaa tt  
GTGCGTGGATGAGGCTGGTTCTAAATCACCCATTCAGTACATCGATATCGG

6654 30 7 0 11 ORF1a-VNSVPWDTIAN2130D  
ATCTAGAGTATTAGGTTTGAAAACCCTTGCTACTCATGGTTTAGCTGCTG  
tta ata gtg tcc ctt ggg ata cta tag cta  
ATTATGCTAAGCCTTTTCTTAACAAAGTTGTTAGTACAACACTACTAACATAG

27269 25 6 0 11 ORF6-KVSIWNLDY23fs  
CTTTCAGGTTACTATAGCAGAGATATTACTAATTATTATGAGGACTTTTA

aag ttt cca ttt gga atc ttg att a  
CATCATAAACCTCATAATTAAAAATTTATCTAAGTCACTAACTGAGAATAA

27558 27 6 0 11 ORF7a-LTCFSTQFA56del  
ACATACGAGGGCAATTCACCATTTTCATCCTCTAGCTGATAACAAATTTGC  
act gac ttg ctt tag cac tca att tgc  
TTTTGCTTGTCTGACGGCGTAAAACACGTCTATCAGTTACGTGCCAGATC

27387 8 5 0 11 ORF6-\*62fs  
GAGAATAAATATTCTCAATTAGATGAAGAGCAACCAATGGAGATTGATTA  
aac gaa ca  
TGAAAATTATTCTTTTCTTGGCACTGATAAACTCGCTACTTGTGAGCTTT

27387 8 5 0 11 ORF7a-M1fs  
GAGAATAAATATTCTCAATTAGATGAAGAGCAACCAATGGAGATTGATTA  
aac gaa ca  
TGAAAATTATTCTTTTCTTGGCACTGATAAACTCGCTACTTGTGAGCTTT

27572 7 4 0 11 ORF7a-STQ60fs  
TTCACCATTTTCATCCTCTAGCTGATAACAAATTTGCACTGACTTGCTTTA  
gca ctc a  
ATTTGCTTTTGCTTGTCTGACGGCGTAAAACACGTCTATCAGTTACGTGC

25521 11 2 0 11 ORF3a-FGWL43fs  
GATTTTGTTCGCGCTACTGCAACGATACCGATACAAGCCTCACTCCCTTT  
cgg atg gct ta  
TTGTTGGCGTTGCACTTCTTGCTGTTTTTCAGAGCGCTTCCAAAATCATAA

6377 18 1 0 11 ORF1a-NLACED2038del  
CATCAAATTCGTTTGATGTACTGAAGTCAGAGGACGCGCAGGGAATGGAT  
aat ctt gcc tgc gaa gat  
CTAAAACCAGTCTCTGAAGAAGTAGTGGAATAATCCTACCATACAGAAAGAC

27490 17 1 0 11 ORF7a-EPCSSG33fs  
AGCTTTATCACTACCAAGAGTGTGTTAGAGGTACAACAGTACTTTTAAAA  
gaa cct tgc tct tct gg  
AACATACGAGGGCAATTCACCATTTTCATCCTCTAGCTGATAACAAATTTGC

28221 11 1 0 11 ORF8-EYHD110fs  
CTAAATTGGGTAGTCTTGTAGTGC GTTGTTCGTTCTATGAAGACTTTTTA  
gag tat cat ga  
CGTTCGTGTTGTTTTAGATTTTCATCTAAACGAACAACTAAAATGTCTGAT

27267 31 1 0 11 ORF6-FKVSINLDYI22fs  
GACTTTCAGGTTACTATAGCAGAGATATTACTAATTATTATGAGGACTTT  
taa agt ttc cat ttg gaa tct tga tta cat c  
ATAAACCTCATAATTAATAAATTTATCTAAGTCACTAACTGAGAATAAATAT

21977 18 9 0 10 S-PFLGVY139del  
ACGCTACTAATGTTGTTATTAAAGTCTGTGAATTTCAATTTTGTAATGAT  
cca ttt ttg ggt gtt tat  
TACCACAAAAACAACAAAAGTTGGATGGAAAGTGAGTTCAGAGTTTATTCT

21987 9 8 0 10 S-GVYY142D

TGTTGTTATTAAAGTCTGTGAATTTCAATTTTGTAAATGATCCATTTTGG  
gtg ttt att  
ACCACAAAAACAACAAAAGTTGGATGGAAAGTGAGTTCAGAGTTTATTCTA

29749 25 5 0 10  
TAGGGAGGACTTGAAAGAGCCACCACATTTTCACCGAGGCCACGCGGAGT  
acg atc gag tgt aca gtg aac aat g  
CTAGGGAGAGCTGCCTATATGGAAGAGCCCTAATGTGTAAAATTAATTTTA

29762 9 4 0 10  
AAAGAGCCACCACATTTTCACCGAGGCCACGCGGAGTACGATCGAGTGTA  
cag tga aca  
ATGCTAGGGAGAGCTGCCTATATGGAAGAGCCCTAATGTGTAAAATTAATT

27618 7 4 0 10 ORF7a-YQL75fs  
TTTAGCACTCAATTTGCTTTTGCTTGTCTGACGGCGTAAAACACGTCTA  
tca gtt a  
CGTGCCAGATCAGTTTCACCTAAACTGTTTCATCAGACAAGAGGAAGTTCAA

27548 7 3 0 10 ORF7a-NKF52fs  
CTCTTCTGGAACATACGAGGGCAATTCACCATTTTCATCCTCTAGCTGATA  
aca aat t  
TGCACTGACTTGCTTTAGCACTCAATTTGCTTTTGCTTGTCTGACGGCGT

29737 19 3 0 10  
AGTGTGTAACATTAGGGAGGACTTGAAAGAGCCACCACATTTTCACCGAG  
gcc acg cgg agt acg atc g  
AGTGTACAGTGAACAATGCTAGGGAGAGCTGCCTATATGGAAGAGCCCTAA

25708 12 2 0 10 ORF3a-LYLY106del  
CAGTTTACTCACACCTTTTGCTCGTTGCTGCTGGCCTTGAAGCCCCTTTT  
ctc tat ctt tat  
GCTTTAGTCTACTTCTTGCAGAGTATAAACTTTGTAAAGAATAATAATGAGG

29731 24 1 0 10  
TTAATCAGTGTGTAACATTAGGGAGGACTTGAAAGAGCCACCACATTTTC  
acc gag gcc acg cgg agt acg atc  
GAGTGTACAGTGAACAATGCTAGGGAGAGCTGCCTATATGGAAGAGCCCTA

29749 11 1 0 10  
TAGGGAGGACTTGAAAGAGCCACCACATTTTCACCGAGGCCACGCGGAGT  
acg atc gag tg  
TACAGTGAACAATGCTAGGGAGAGCTGCCTATATGGAAGAGCCCTAATGTG

27615 9 1 0 10 ORF7a-YQL75del  
TGCTTTAGCACTCAATTTGCTTTTGCTTGTCTGACGGCGTAAAACACGT  
cta tca gtt  
ACGTGCCAGATCAGTTTCACCTAAACTGTTTCATCAGACAAGAGGAAGTTCA

27566 13 1 0 10 ORF7a-CFSTQ58fs  
GGGCAATTCACCATTTTCATCCTCTAGCTGATAACAAATTTGCACTGACTT  
gct tta gca ctc a  
ATTTGCTTTTGCTTGTCTGACGGCGTAAAACACGTCTATCAGTTACGTGC

27267 26 8 0 9 ORF6-FKVSIWNLD22fs  
GACTTTCAGGTTACTATAGCAGAGATATTACTAATTATTATGAGGACTTT  
taa agt ttc cat ttg gaa tct tga tt  
ACATCATAAACCTCATAATTA AAAATTTATCTAAGTCACTAACTGAGAATA

28880 7 6 0 9 N-RGT203fs  
CCTCATCACGTAGTCGCAACAGTTCAAGAAATTCAACTCCAGGCAGCAGT  
agg gga a  
CTTCTCCTGCTAGAAATGGCTGGCAATGGCGGTGATGCTGCTCTTGCTTTGC

27715 9 5 0 9 ORF7a-VFI108del  
AGGAAGTTCAAGAACTTTACTCTCCAATTTTCTTATTGTTGCGGCAATA  
gtg ttt ata  
ACACTTTGCTTCACACTCAAAAGAAAGACAGAATGATTGAACTTTCATTAA

28888 11 5 0 9 N-TSPA205fs  
CGTAGTCGCAACAGTTCAAGAAATTCAACTCCAGGCAGCAGTAGGGGAAC  
ttc tcc tgc ta  
GAATGGCTGGCAATGGCGGTGATGCTGCTCTTGCTTTGCTGCTGCTTGACA

27389 11 4 0 9 ORF7a-MK1del  
GAATAAATATTCTCAATTAGATGAAGAGCAACCAATGGAGATTGATTAAA  
cga aca tga aa  
ATTATTCTTTTCTTGGCACTGATAACACTCGCTACTTGTGAGCTTTATCAC

29750 14 4 0 9  
AGGGAGGACTTGAAAGAGCCACCACATTTTCACCGAGGCCACGCGGAGTA  
cga tcg agt gta ca  
GTGAACAATGCTAGGGAGAGCTGCCTATATGGAAGAGCCCTAATGTGTAAA

27697 9 4 0 9 ORF7a-LIV102del  
AACTGTTTCATCAGACAAGAGGAAGTTCAAGAACTTTACTCTCCAATTTTT  
ctt att gtt  
GCGGCAATAGTGTTTATAACACTTTGCTTCACACTCAAAAGAAAGACAGAA

27572 8 4 0 9 ORF7a-STQ60fs  
TTCACCATTTCATCCTCTAGCTGATAACAAATTTGCACTGACTTGCTTTA  
gca ctc aa  
TTTGCTTTTGCTTGTCCTGACGGCGTAAAACACGTCTATCAGTTACGTGCC

27630 12 3 0 9 ORF7a-RSVS80del  
TTTGCTTTTGCTTGTCCTGACGGCGTAAAACACGTCTATCAGTTACGTGC  
cag atc agt ttc  
ACCTAAACTGTTTCATCAGACAAGAGGAAGTTCAAGAACTTTACTCTCCAAT

21971 24 1 0 9 S-NDPFLGVY137del  
TTAATAACGCTACTAATGTTGTTATTAAAGTCTGTGAATTTCAATTTTGT  
aat gat cca ttt ttg ggt gtt tat  
TACCACAAAAACAACAAAAGTTGGATGGAAAGTGAGTTCAGAGTTTATTCT

28993 9 1 0 9 N-QQQG240H  
CTTGACAGATTGAACCAGCTTGAGAGCAAAATGTCTGGTAAAGGCCAACA  
aca aca agg  
CCAAACTGTCACTAAGAAATCTGCTGCTGAGGCTTCTAAGAAGCCTCGGCA



28247 9 1 0 9 ORF8-LDFI118F  
TGTTTCGTTCTATGAAGACTTTTTAGAGTATCATGACGTTTCGTGTTGTTTT  
aga ttt cat  
CTAAACGAACAACTAAAATGTCTGATAATGGACCCCAAATCAGCGAAAT

28031 21 1 0 9 ORF8-YIRVGARK46\*  
CCATATGTAGTTGATGACCCGTGTCCTATTCACCTTCTATTCTAAATGGTA  
tat tag agt agg agc tag aaa  
ATCAGCACCTTTAATTGAATTGTGCGTGGATGAGGCTGGTTCTAAATCACC

27530 27 1 0 9 ORF7a-FHPLADNKFA46S  
ACTTTTAAAAGAACCTTGCTCTTCTGGAACATACGAGGGCAATTCACCAT  
ttc atc ctc tag ctg ata aca aat ttg  
CACTGACTTGCTTTAGCACTCAATTTGCTTTTGCTTGTCTGACGGCGTAA

21602 9 8 0 8 S-QCV14del  
CTAAACGAACAATGTTTGTTTTTCTTGTTTTATTGCCACTAGTCTCTAGT  
cag tgt gtt  
AATCTTACAACCAGAACTCAATTACCCCCTGCATACACTAATTCTTTCACA

21973 24 7 0 8 S-DPFLGVYY138del  
AATAACGCTACTAATGTTGTTATTAAAGTCTGTGAATTTCAATTTTGTA  
tga tcc att ttt ggg tgt tta tta  
CCACAAAAACAACAAAAGTTGGATGGAAAGTGAGTTCAGAGTTTATTCTAG

514 12 7 0 8 ORF1a-HVMVE83Q  
CCCTATGTGTTTCATCAAACGTTCCGGATGCTCGAACTGCACCTCATGGTCA  
tgt tat ggt tga  
GCTGGTAGCAGAACTCGAAGGCATTTCAGTACGGTCGTAGTGGTGAGACACT

29761 13 5 0 8  
GAAAGAGCCACCACATTTTCACCGAGGCCACGCGGAGTACGATCGAGTGT  
aca gtg aac aat g  
CTAGGGAGAGCTGCCTATATGGAAGAGCCCTAATGTGTAAAATTAATTTTA

27571 11 5 0 8 ORF7a-STQF60fs  
ATTCACCATTTTCATCCTCTAGCTGATAACAAATTTGCACTGACTTGCTTT  
agc act caa tt  
TGCTTTTGCTTGTCTGACGGCGTAAAACACGTCTATCAGTTACGTGCCAG

29750 27 5 0 8  
AGGGAGGACTTGAAAGAGCCACCACATTTTCACCGAGGCCACGCGGAGTA  
cga tcg agt gta cag tga aca atg cta  
GGGAGAGCTGCCTATATGGAAGAGCCCTAATGTGTAAAATTAATTTTAGTA

27617 24 4 0 8 ORF7a-YQLRARSV75del  
CTTTAGCACTCAATTTGCTTTTGCTTGTCTGACGGCGTAAAACACGTCT  
atc agt tac gtg cca gat cag ttt  
CACCTAACTGTTTCATCAGACAAGAGGAAGTTCAAGAACTTTACTCTCCAA

29725 17 4 0 8  
CAATCTTTAATCAGTGTGTAACATTAGGGAGGACTTGAAAGAGCCACCAC  
att ttc acc gag gcc ac

GCGGAGTACGATCGAGTGTACAGTGAACAATGCTAGGGAGAGCTGCCTATA

29722 20 4 0 8  
TAGCAATCTTTAATCAGTGTGTAACATTAGGGAGGACTTGAAAGAGCCAC  
cac att ttc acc gag gcc ac  
GCGGAGTACGATCGAGTGTACAGTGAACAATGCTAGGGAGAGCTGCCTATA

29736 12 3 0 8  
CAGTGTGTAACATTAGGGAGGACTTGAAAGAGCCACCACATTTTCACCGA  
ggc cac ggc gag  
TACGATCGAGTGTACAGTGAACAATGCTAGGGAGAGCTGCCTATATGGAAG

25448 29 2 0 8 ORF3a-EIKDATPSDF19fs  
TTTGTATTATGAGAATCTTCACAATTGGAAGTGAACCTTGAAGCAAGGTG  
aaa tca agg atg cta ctc ctt cag att tt  
GTTTCGCGCTACTGCAACGATACCGATACAAGCCTCACTCCCTTTCGGATGG

29683 8 2 0 8  
TACATAGCACAAGTAGATGTAGTTAACTTTAATCTCACATAGCAATCTTT  
aat cag tg  
TGTAACATTAGGGAGGACTTGAAAGAGCCACCACATTTTCACCGAGGCCAC

6332 24 2 0 8 ORF1a-NSFDVLKS2023del  
ATACCTGGTGTATACGTTGTCTTTGGAGCACAAAACCAGTTGAAACATCA  
aat tcg ttt gat gta ctg aag tca  
GAGGACGCGCAGGGAATGGATAATCTTGCCTGCGAAGATCTAAAACCAGTC

28151 7 2 0 8 ORF8-FTI86fs  
CCCATTTCAGTACATCGATATCGGTAATTATACAGTTTCCTGTTTACCTTT  
tac aat t  
AATTGCCAGGAACCTAAATTGGGTAGTCTTGTAGTGCGTTGTTTCGTTCTAT

27677 20 1 0 8 ORF7a-ELYSPIF95fs  
TGCCAGATCAGTTTCACCTAAACTGTTTCATCAGACAAGAGGAAGTTCAAG  
aac ttt act ctc caa ttt tt  
CTTATTGTTGCGGCAATAGTGTTTATAACACTTTGCTTCACACTCAAAAGA

28898 21 1 0 8 N-RMAGNNGG209del  
ACAGTTCAAGAAATTCAACTCCAGGCAGCAGTAGGGGAAGTTCTCCTGCT  
aga atg gct ggc aat ggc ggt  
GATGCTGCTCTTGCTTTGCTGCTTGCTTGACAGATTGAACCAGCTTGAGAGC

27737 27 1 0 8 ORF7a-TLKRKTE\*115fs  
TCCAATTTTCTTATTGTTGCGGCAATAGTGTTTATAACACTTTGCTTCA  
cac tca aaa gaa aga cag aat gat tga  
ACTTTCATTAATTGACTTCTATTTGTGCTTTTTAGCCTTTCTGCTATTCCT

27737 27 1 0 8 ORF7b-MIE1fs  
TCCAATTTTCTTATTGTTGCGGCAATAGTGTTTATAACACTTTGCTTCA  
cac tca aaa gaa aga cag aat gat tga  
ACTTTCATTAATTGACTTCTATTTGTGCTTTTTAGCCTTTCTGCTATTCCT

27676 8 1 0 8 ORF7a-ELY95fs  
GTGCCAGATCAGTTTCACCTAAACTGTTTCATCAGACAAGAGGAAGTTCAA

gaa ctt ta  
CTCTCCAATTTTTCTTATTGTTGCGGCAATAGTGTTTATAACACTTTGCTT

27567 27 6 0 7 ORF7a-FSTQFAFAC59del  
GGCAATTCACCATTTCATCCTCTAGCTGATAACAAATTTGCACTGACTTG  
ctt tag cac tca att tgc ttt tgc ttg  
TCCTGACGGCGTAAAACACGTCTATCAGTTACGTGCCAGATCAGTTTCACC

686 15 5 0 7 ORF1a-KSFDL141del  
GTAAGAACGGTAATAAAGGAGCTGGTGGCCATAGTTACGGCGCCGATCTA  
aag tca ttt gac tta  
GGCGACGAGCTTGGCACTGATCCTTATGAAGATTTTCAAGAAAACCTGGAAC

28048 15 5 0 7 ORF8-RKSAPL52I  
CCCGTGTCCTATTCACCTTCTATTCTAAATGGTATATTAGAGTAGGAGCTA  
gaa aat cag cac ctt  
TAATTGAATTGTGCGTGGATGAGGCTGGTTCTAAATCACCCATTTCAGTACA

28857 9 5 0 7 N-RNS195del  
CGGCAGTCAAGCCTCTTCTCGTTCCTCATCACGTAGTCGCAACAGTTCAA  
gaa att caa  
CTCCAGGCAGCAGTAGGGGAACTTCTCCTGCTAGAATGGCTGGCAATGGCG

28086 13 5 0 7 ORF8-AGSKS65fs  
GAGTAGGAGCTAGAAAATCAGCACCTTTAATTGAATTGTGCGTGGATGAG  
gct ggt tct aaa t  
CACCCATTTCAGTACATCGATATCGGTAATTATACAGTTTCCTGTTTACCTT

27268 21 4 0 7 ORF6-KVSIWNL23del  
ACTTTCAGGTTACTATAGCAGAGATATTACTAATTATTATGAGGACTTTT  
aaa gtt tcc att tgg aat ctt  
GATTACATCATAAACCTCATAATTAAAAATTTATCTAAGTCACTAACTGAG

27683 18 4 0 7 ORF7a-YSPIFLI97F  
ATCAGTTTTCACCTAAACTGTTTCATCAGACAAGAGGAAGTTCAAGAACTTT  
act etc caa ttt ttc tta  
TTGTTGCGGCAATAGTGTTTATAACACTTTGCTTCACACTCAAAGAAAGA

25521 15 4 0 7 ORF3a-WLIVG45del  
GATTTTGTTCGCGCTACTGCAACGATAACCGATACAAGCCTCACTCCCTTT  
cgg atg gct tat tgt  
TGGCGTTGCACTTCTTGCTGTTTTTCAGAGCGCTTCCAAAATCATAACCCT

27606 7 3 0 7 ORF7a-VKH71fs  
GCACTGACTTGCTTTAGCACTCAATTTGCTTTTGCTTGTCCTGACGGCGT  
aaa aca c  
GTCTATCAGTTACGTGCCAGATCAGTTTCACCTAAACTGTTTCATCAGACAA

29738 18 3 0 7  
GTGTGTAACATTAGGGAGGACTTGAAAGAGCCACCACATTTTCACCGAGG  
cca cgc gga gta cga tgc  
AGTGTACAGTGAACAATGCTAGGGAGAGCTGCCTATATGGAAGAGCCCTAA

3348 9 3 0 7 ORF1a-FSG1028del

ATTAGAGATGGAACCTTACACCAGTTGTTTCAGACTATTGAAGTGAATAGTT  
tta gtg gtt  
ATTTAAAACTTACTGACAATGTATACATTAAAAATGCAGACATTGTGGAAG

27591 19 3 0 7 ORF7a-ACPDGVK66fs  
GCTGATAACAAATTTGCACTGACTTGCTTTAGCACTCAATTTGCTTTTGC  
ttg tcc tga cgg cgt aaa a  
CACGTCTATCAGTTACGTGCCAGATCAGTTTTCACCTAAACTGTTCATCAGA

26158 21 2 0 7 ORF3a-VNPVMEP256del  
AGCCTGAAGAACATGTCCAAATTCACACAATCGACGGTTCATCCGGAGTT  
gtt aat cca gta atg gaa cca  
ATTTATGATGAACCGACGACGACTACTAGCGTGCCTTTGTAAGCACAAGCT

27687 21 2 0 7 ORF7a-PIFLIVA99del  
GTTTCACCTAAACTGTTCATCAGACAAGAGGAAGTTCAAGAACTTTACTC  
tcc aat ttt tct tat tgt tgc  
GGCAATAGTGTTTATAACACTTTGCTTCACACTCAAAAGAAAGACAGAATG

27677 29 1 0 7 ORF7a-ELYSPIFLIV95fs  
TGCCAGATCAGTTTCACCTAAACTGTTCATCAGACAAGAGGAAGTTCAAG  
aac ttt act ctc caa ttt ttc tta ttg tt  
GCGGCAATAGTGTTTATAACACTTTGCTTCACACTCAAAAGAAAGACAGAA

27574 30 1 0 7 ORF7a-TQFAFACPDG61del  
CACCATTTTCATCCTCTAGCTGATAACAAATTTGCACTGACTTGCTTTAGC  
act caa ttt gct ttt gct tgt cct gac ggc  
GTAAACACGTCTATCAGTTACGTGCCAGATCAGTTTCACCTAAACTGTTC

6330 9 1 0 7 ORF1a-SNS2022del  
AAATACCTGGTGTATACGTTGTCTTTGGAGCACAAAACCAGTTGAAACAT  
caa att cgt  
TTGATGTACTGAAGTCAGAGGACGCGCAGGGAATGGATAATCTTGCCTGCG

29762 29 1 0 7  
AAAGAGCCACCACATTTTACCCGAGGCCACGCGGAGTACGATCGAGTGTA  
cag tga aca atg cta ggg aga gct gcc ta  
TATGGAAGAGCCCTAATGTGTAAAATTAATTTTAGTAGTGCTATCCCCATG

26155 7 1 0 7 ORF3a-VVN255fs  
ATGAGCCTGAAGAACATGTCCAAATTCACACAATCGACGGTTCATCCGGA  
gtt gtt a  
ATCCAGTAATGGAACCAATTTATGATGAACCGACGACGACTACTAGCGTGC

27580 20 1 0 7 ORF7a-FAFACPD63fs  
TTCATCCTCTAGCTGATAACAAATTTGCACTGACTTGCTTTAGCACTCAA  
ttt gct ttt gct tgt cct ga  
CGGCGTAAAACACGTCTATCAGTTACGTGCCAGATCAGTTTTCACCTAAACT

3342 9 6 0 6 ORF1a-NSF1026del  
ACCTCAATTAGAGATGGAACCTTACACCAGTTGTTTCAGACTATTGAAGTGA  
ata gtt tta  
GTGGTTATTTAAAACTTACTGACAATGTATACATTAAAAATGCAGACATTG

29736 26 6 0 6  
CAGTGTGTAACATTAGGGAGGACTTGAAAGAGCCACCACATTTTCACCGA  
ggc cac gcg gag tac gat cga gtg ta  
CAGTGAACAATGCTAGGGAGAGCTGCCTATATGGAAGAGCCCTAATGTGTA

28147 7 5 0 6 ORF8-PFT85fs  
ATCACCCATTTCAGTACATCGATATCGGTAATTATACAGTTTCCTGTTTAC  
ctt tta c  
AATTAATTGCCAGGAACCTAAATTGGGTAGTCTTGTAAGTGCCTTGTTCGTT

26161 21 4 0 6 ORF3a-NPVMPI257del  
CTGAAGAACATGTCCAAATTCACACAATCGACGGTTCATCCGGAGTTGTT  
aat cca gta atg gaa cca att  
TATGATGAACCGACGACGACTACTAGCGTGCCTTTGTAAGCACAAGCTGAT

29749 13 3 0 6  
TAGGGAGGACTTGAAAGAGCCACCACATTTTCACCGAGGCCACGCGGAGT  
acg atc gag tgt a  
CAGTGAACAATGCTAGGGAGAGCTGCCTATATGGAAGAGCCCTAATGTGTA

27599 26 3 0 6 ORF7a-DGVKHVYQL69fs  
CAAATTTGCACTGACTTGCTTTAGCACTCAATTTGCTTTTGCTTGTCTG  
acg gcg taa aac acg tct atc agt ta  
CGTGCCAGATCAGTTTCACCTAAACTGTTCATCAGACAAGAGGAAGTTCAA

25432 9 3 0 6 ORF3a-TLK14del  
TAAACGAACCTTATGGATTTGTTTATGAGAATCTTCACAATTGGAACCTGTA  
act ttg aag  
CAAGGTGAAATCAAGGATGCTACTCCTTCAGATTTTGTTTCGCGCTACTGCA

29730 22 3 0 6  
TTTAATCAGTGTGTAACATTAGGGAGGACTTGAAAGAGCCACCACATTTT  
cac cga ggc cac gcg gag tac g  
ATCGAGTGTACAGTGAACAATGCTAGGGAGAGCTGCCTATATGGAAGAGCC

29732 21 3 0 6  
TAATCAGTGTGTAACATTAGGGAGGACTTGAAAGAGCCACCACATTTTCA  
cgc agg cca cgc gga gta cga  
TCGAGTGTACAGTGAACAATGCTAGGGAGAGCTGCCTATATGGAAGAGCCC

27686 13 3 0 6 ORF7a-SPIFL98fs  
AGTTTCACCTAAACTGTTCATCAGACAAGAGGAAGTTCAAGAACTTTACT  
ctc caa ttt ttc t  
TATTGTTGCGGCAATAGTGTTTATAACACTTTGCTTCACACTCAAAAGAAA

27903 7 3 0 6 ORF8-LVF4fs  
AACTGCAAGATCATAATGAACTTGTACGCCTAAACGAACATGAAATTT  
ctt gtt t  
TCTTAGGAATCATCACAACCTGTAGCTGCATTTACCAAGAATGTAGTTTAC

3937 9 3 0 6 ORF1a-RKQ1225del  
AAAGAGGAAGTTAAGCCATTTATAACTGAAAGTAAACCTTCAGTTGAACA  
gag aaa aca  
AGATGATAAGAAAATCAAAGCTTGTGTTGAAGAAGTTACAACAACCTCTGGA

27715 12 3 0 6 ORF7a-VFIT108del  
AGGAAGTTCAAGAACTTTACTCTCCAATTTTCTTATTGTTGCGGCAATA  
gtg ttt ata aca  
CTTTGCTTCACACTCAAAAGAAAGACAGAATGATTGAACTTTCATTAATTG

29753 15 3 0 6  
GAGGACTTGAAAGAGCCACCACATTTTCACCGAGGCCACGCGGAGTACGA  
tcg agt gta cag tga  
ACAATGCTAGGGAGAGCTGCCTATATGGAAGAGCCCTAATGTGTAAAATTA

27702 21 3 0 6 ORF7a-VAAIVFI104del  
TTCATCAGACAAGAGGAAGTTCAAGAACTTTACTCTCCAATTTTCTTAT  
tgt tgc ggc aat agt gtt tat  
AACACTTTGCTTCACACTCAAAAGAAAGACAGAATGATTGAACTTTCATTA

29731 7 2 0 6  
TTAATCAGTGTGTAACATTAGGGAGGACTTGAAAGAGCCACCACATTTTC  
acc gag g  
CCACGCGGAGTACGATCGAGTGTACAGTGAACAATGCTAGGGAGAGCTGCC

27684 22 2 0 6 ORF7a-YSPIFLIV97fs  
TCAGTTTCACCTAAACTGTTTCATCAGACAAGAGGAAGTTCAAGAACTTTA  
ctc tcc aat ttt tct tat tgt t  
GCGGCAATAGTGTTTATAACACTTTGCTTCACACTCAAAAGAAAGACAGAA

27596 24 2 0 6 ORF7a-PDGVKHSVY68del  
TAACAAATTTGCACTGACTTGCTTTAGCACTCAATTTGCTTTTGCTTGTC  
ctg acg gcg taa aac acg tct atc  
AGTTACGTGCCAGATCAGTTTCACCTAAACTGTTTCATCAGACAAGAGGAAG

29747 13 2 0 6  
ATTAGGGAGGACTTGAAAGAGCCACCACATTTTCACCGAGGCCACGCGGA  
gta cga tcg agt g  
TACAGTGAACAATGCTAGGGAGAGCTGCCTATATGGAAGAGCCCTAATGTG

28240 7 2 0 6 ORF8-VVL116fs  
AGTGCGTTGTTTCGTTCTATGAAGACTTTTTAGAGTATCATGACGTTCTGTG  
ttg ttt t  
AGATTTTCATCTAAACGAACAACTAAAATGTCTGATAATGGACCCCAAAT

21982 15 2 0 6 S-LGVYY141del  
ACTAATGTTGTTATTAAAGTCTGTGAATTTCAATTTTGTAATGATCCATT  
ttt ggg tgt tta tta  
CCACAAAAACAACAAAAGTTGGATGGAAAGTGAGTTCAGAGTTTATTCTAG

27606 9 1 0 6 ORF7a-KHV72del  
GCACTGACTTGCTTTAGCACTCAATTTGCTTTTGCTTGTCCTGACGGCGT  
aaa aca cgt  
CTATCAGTTACGTGCCAGATCAGTTTCACCTAAACTGTTTCATCAGACAAGA

27972 25 1 0 6 ORF8-QHQPYVVDD27fs  
TCACAACTGTAGCTGCATTTACCAAGAATGTAGTTTACAGTCATGTACT  
caa cat caa cca tat gta gtt gat g

ACCCGTGTCCTATTCACTTCTATTCTAAATGGTATATTAGAGTAGGAGCTA

27673 21 1 0 6 ORF7a-QELYSPI94del  
TACGTGCCAGATCAGTTTCACCTAAACTGTTTCATCAGACAAGAGGAAGTT  
caa gaa ctt tac tct cca att  
TTTCTTATTGTTGCGGCAATAGTGTTTATAACACTTTGCTTCACACTCAAA

27577 29 1 0 6 ORF7a-QFAFACPDGV62fs  
CATTTTCATCCTCTAGCTGATAACAAATTTGCACTGACTTGCTTTAGCACT  
caa ttt gct ttt gct tgt cct gac ggc gt  
AAAACACGTCTATCAGTTACGTGCCAGATCAGTTTCACCTAAACTGTTTCAT

29733 13 1 0 6  
AATCAGTGTGTAACATTAGGGAGGACTTGAAAGAGCCACCACATTTTCAC  
cga ggc cac ggc g  
AGTACGATCGAGTGTACAGTGAACAATGCTAGGGAGAGCTGCCTATATGGA

22028 12 1 0 6 S-EFRV156del  
CATTTTTGGGTGTTTATTACCACAAAAACAACAAAAGTTGGATGGAAAGT  
gag ttc aga gtt  
TATTCTAGTGCGAATAATTGCACTTTTGAATATGTCTCTCAGCCTTTTCTT

21761 27 1 0 6 S-AIHVSGTNG67del  
CAACTCAGGACTTGTTCTTACCTTTCTTTTCCAATGTTACTTGGTTCAT  
gct ata cat gtc tct ggg acc aat ggt  
ACTAAGAGGTTTGATAACCCTGTCCTACCATTTAATGATGGTGTTTATTTT

27583 12 1 0 6 ORF7a-AFAC64del  
ATCCTCTAGCTGATAACAAATTTGCACTGACTTGCTTTAGCACTCAATTT  
gct ttt gct tgt  
CCTGACGGCGTAAAACACGTCTATCAGTTACGTGCCAGATCAGTTTCACCT

27267 22 1 0 6 ORF6-FKVSIWNL22fs  
GACTTTCAGGTTACTATAGCAGAGATATTACTAATTATTATGAGGACTTT  
taa agt ttc cat ttg gaa tct t  
GATTACATCATAAACCTCATAATTA AAAAATTTATCTAAGTCACTAACTGAG

517 7 1 0 6 ORF1a-VMV84fs  
TATGTGTTTCATCAAACGTTTCGGATGCTCGAACTGCACCTCATGGTCATGT  
tat ggt t  
GAGCTGGTAGCAGAACTCGAAGGCATTACGTACGGTCGTAGTGGTGAGACA

27607 11 5 0 5 ORF7a-KHVV72fs  
CACTGACTTGCTTTAGCACTCAATTTGCTTTTGCTTGTCTGACGGCGTA  
aaa cac gtc ta  
TCAGTTACGTGCCAGATCAGTTTCACCTAAACTGTTTCATCAGACAAGAGGA

21974 18 5 0 5 S-DPFLGV138del  
ATAACGCTACTAATGTTGTTATTAAAGTCTGTGAATTTCAATTTTGTAAT  
gat cca ttt ttg ggt gtt  
TATTACCACAAAAACAACAAAAGTTGGATGGAAAGTGAGTTCAGAGTTTAT

29754 12 4 0 5  
AGGACTTGAAAGAGCCACCACATTTTCACCGAGGCCACGCGGAGTACGAT

cga gtg tac agt  
GAACAATGCTAGGGAGAGCTGCCTATATGGAAGAGCCCTAATGTGTAAAAT

431 30 4 0 5 ORF1a-VEKGVLPQLE56del  
TATCAGAGGCACGTCAACATCTTAAAGATGGCACTTGTGGCTTAGTAGAA  
gtt gaa aaa ggc gtt ttg cct caa ctt gaa  
CAGCCCTATGTGTTTCATCAAACGTTTCGGATGCTCGAACTGCACCTCATGGT

6513 12 4 0 5 ORF1a-SLKI2083del  
GAAAACTACCGAAGTTGTAGGAGACATTATACTTAAACCAGCAAATAATA  
gtt taa aaa tta  
CAGAAGAGGTTGGCCACACAGATCTAATGGCTGCTTATGTAGACAATTCTA

27683 13 3 0 5 ORF7a-YSPIF97fs  
ATCAGTTTTCACCTAAACTGTTTCATCAGACAAGAGGAAGTTCAAGAACTTT  
act ctc caa ttt t  
TCTTATTGTTGCGGCAATAGTGTTTATAACACTTTGCTTCACACTCAAAAG

21602 15 3 0 5 S-QCVNL14del  
CTAAACGAACAATGTTTGTCTTTTCTTGTTTATTGCCACTAGTCTCTAGT  
cag tgt gtt aat ctt  
ACAACCAGAACTCAATTACCCCCTGCATACACTAATTCTTTCACACGTGGT

506 12 3 0 5 ORF1a-HGHV81del  
TTGAACAGCCCTATGTGTTTCATCAAACGTTTCGGATGCTCGAACTGCACCT  
cat ggt cat gtt  
ATGGTTGAGCTGGTAGCAGAACTCGAAGGCATTTCAGTACGGTCGTAGTGGT

29738 30 3 0 5  
GTGTGTAACATTAGGGAGGACTTGAAAGAGCCACCACATTTTCACCGAGG  
cca cgc gga gta cga tcg agt gta cag tga  
ACAATGCTAGGGAGAGCTGCCTATATGGAAGAGCCCTAATGTGTAAAATTA

29750 18 3 0 5  
AGGGAGGACTTGAAAGAGCCACCACATTTTCACCGAGGCCACGCGGAGTA  
cga tcg agt gta cag tga  
ACAATGCTAGGGAGAGCTGCCTATATGGAAGAGCCCTAATGTGTAAAATTA

27762 12 3 0 5 ORF7b-ELSL3del  
ATAGTGTTTATAACACTTTGCTTCACACTCAAAAGAAAGACAGAATGATT  
gaa ctt tca tta  
ATTGACTTCTATTTGTGCTTTTTAGCCTTTCTGCTATTCCTTGTTTTAATT

28248 7 3 0 5 ORF8-DFI119fs  
GTTTCGTTCTATGAAGACTTTTTAGAGTATCATGACGTTTCGTGTTGTTTTA  
gat ttc a  
TCTAAACGAACAAACTAAAATGTCTGATAATGGACCCCAAAATCAGCGAAA

27572 10 3 0 5 ORF7a-STQF60fs  
TTCACCATTTCATCCTCTAGCTGATAACAAATTTGCACTGACTTGCTTTA  
gca ctc aat t  
TGCTTTTGCTTGTCCTGACGGCGTAAAACACGTCTATCAGTTACGTGCCAG

28242 11 3 0 5 ORF8-VLDF117fs



TGCGTTGTTTCGTTCTATGAAGACTTTTTAGAGTATCATGACGTTTCGTGTT  
gtt tta gat tt  
CATCTAAACGAACAACTAAAATGTCTGATAATGGACCCCAAAATCAGCGA

28242 17 3 0 5 ORF8-VLDFI\*117fs  
TGCGTTGTTTCGTTCTATGAAGACTTTTTAGAGTATCATGACGTTTCGTGTT  
gtt tta gat ttc atc ta  
AACGAACAACTAAAATGTCTGATAATGGACCCCAAAATCAGCGAAATGCA

27906 8 3 0 5 ORF8-VFL5fs  
TGCAAGATCATAATGAACTTGTACGCCTAAACGAACATGAAATTTCTT  
gtt ttc tt  
AGGAATCATCACAACGTAGCTGCATTTACCAAGAATGTAGTTTACAGTC

11271 9 3 0 5 ORF1a-MVD3669del  
GGTCTATATGCCTGCTAGTTGGGTGATGCGTATTATGACATGGTTGGATA  
tgg ttg ata  
CTAGTTTGTCTGGTTTTAAGCTAAAAGACTGTGTTATGTATGCATCAGCTG

28245 14 3 0 5 ORF8-LDFI\*118fs  
GTTGTTTCGTTCTATGAAGACTTTTTAGAGTATCATGACGTTTCGTGTTGTT  
tta gat ttc atc ta  
AACGAACAACTAAAATGTCTGATAATGGACCCCAAAATCAGCGAAATGCA

27694 12 3 0 5 ORF7a-FLIV101del  
CTAAACTGTTTCATCAGACAAGAGGAAGTTCAAGAACTTTACTCTCCAATT  
ttt ctt att gtt  
GCGGCAATAGTGTTTATAACACTTTGCTTCACACTCAAAAGAAAGACAGAA

196 15 2 0 5  
ACTGTCGTTGACAGGACACGAGTAACTCGTCTATCTTCTGCAGGCTGCTT  
acg gtt tgc tcc gtg  
TTGCAGCCGATCATCAGCACATCTAGGTTTCGTCCGGGTGTGACCGAAAGG

27549 31 2 0 5 ORF7a-NKFALTCFSTQ52fs  
TCTTCTGGAACATACGAGGGCAATTCACCATTTTCATCCTCTAGCTGATAA  
caa att tgc act gac ttg ctt tag cac tca a  
TTTGCTTTTGCTTGCTCCTGACGGCGTAAAACACGTCTATCAGTTACGTGCC

27448 14 2 0 5 ORF7a-HYQEC19fs  
AAATTATTCTTTTCTTGGCACTGATAAACTCGCTACTTGTGAGCTTTAT  
cac tac caa gag tg  
TGTTAGAGGTACAACAGTACTTTTAAAAGAACCTTGCTCTTCTGGAACATA

25499 15 2 0 5 ORF3a-PIQAS36del  
AATCAAGGATGCTACTCCTTCAGATTTTGTTCGCGCTACTGCAACGATAC  
cga tac aag cct cac  
TCCCTTTCGGATGGCTTATTGTTGGCGTTGCACTTCTTGCTGTTTTTCAGA

27427 17 2 0 5 ORF7a-LATCEL12fs  
AGATTGATTAAACGAACATGAAAATTATTCTTTTCTTGGCACTGATAACA  
ctc gct act tgt gag ct  
TTATCACTACCAAGAGTGTGTTAGAGGTACAACAGTACTTTTAAAAGAACC

29751 19 2 0 5  
GGGAGGACTTGAAAGAGCCACCACATTTTCACCGAGGCCACGCGGAGTAC  
gat cga gtg tac agt gaa c  
AATGCTAGGGAGAGCTGCCTATATGGAAGAGCCCTAATGTGTAAAATTAAT

28080 16 2 0 5 ORF8-DEAGSK63fs  
ATATTAGAGTAGGAGCTAGAAAATCAGCACCTTTAATTGAATTGTGCGTG  
gat gag gct ggt tct a  
AATCACCCATTCAGTACATCGATATCGGTAATTATACAGTTTCCTGTTTAC

28089 8 2 0 5 ORF8-GSK66fs  
TAGGAGCTAGAAAATCAGCACCTTTAATTGAATTGTGCGTGATGAGGCT  
ggt tct aa  
ATCACCCATTCAGTACATCGATATCGGTAATTATACAGTTTCCTGTTTACC

27757 8 2 0 5 ORF7a-\*122del  
CGGCAATAGTGTTTATAACACTTTGCTTCACACTCAAAGAAAGACAGAA  
tga ttg aa  
CTTTCATTAATTGACTTCTATTTGTGCTTTTTAGCCTTTCTGCTATTCCTT

27757 8 2 0 5 ORF7b-MIE1fs  
CGGCAATAGTGTTTATAACACTTTGCTTCACACTCAAAGAAAGACAGAA  
tga ttg aa  
CTTTCATTAATTGACTTCTATTTGTGCTTTTTAGCCTTTCTGCTATTCCTT

27581 8 2 0 5 ORF7a-FAF63fs  
TCATCCTCTAGCTGATAACAAATTTGCACTGACTTGCTTTAGCACTCAAT  
ttg ctt tt  
GCTTGTCCTGACGGCGTAAACACGTCTATCAGTTACGTGCCAGATCAGTT

29749 24 1 0 5  
TAGGGAGGACTTGAAAGAGCCACCACATTTTCACCGAGGCCACGCGGAGT  
acg atc gag tgt aca gtg aac aat  
GCTAGGGAGAGCTGCCTATATGGAAGAGCCCTAATGTGTAAAATTAATTTT

29740 14 1 0 5  
GTGTAACATTAGGGAGGACTTGAAAGAGCCACCACATTTTCACCGAGGCC  
acg cgg agt acg at  
CGAGTGTACAGTGAACAATGCTAGGGAGAGCTGCCTATATGGAAGAGCCCT

27532 24 1 0 5 ORF7a-HPLADNKF47del  
TTTTAAAAGAACCTTGCTCTTCTGGAACATACGAGGGCAATTCACCATT  
cat cct cta gct gat aac aaa ttt  
GCACTGACTTGCTTTAGCACTCAATTTGCTTTTGCTTGTCTGACGGCGTA

3092 24 1 0 5 ORF1a-PSTQYEG943del  
CTCCAGATGAGGATGAAGAAGAAGGTGATTGTGAAGAAGAAGAGTTTGAG  
cca tca act caa tat gag tat ggt  
ACTGAAGATGATTACCAAGGTAAACCTTTGGAATTTGGTGCCACTTCTGCT

29750 22 1 0 5  
AGGGAGGACTTGAAAGAGCCACCACATTTTCACCGAGGCCACGCGGAGTA  
cga tcg agt gta cag tga aca a  
TGCTAGGGAGAGCTGCCTATATGGAAGAGCCCTAATGTGTAAAATTAATTT

3330 15 1 0 5 ORF1a-TIEVN1022del  
TGTTGAGGTTCAACCTCAATTAGAGATGGAACCTACACCAGTTGTTTCAGA  
cta ttg aag tga ata  
GTTTTAGTGGTTATTTAAAACTTACTGACAATGTATACATTAAAAATGCAG

510 8 1 0 5 ORF1a-GHV82fs  
ACAGCCCTATGTGTTTCATCAAACGTTTCGGATGCTCGAACTGCACCTCATG  
gtc atg tt  
ATGGTTGAGCTGGTAGCAGAACTCGAAGGCATTTCAGTACGGTCGTAGTGGT

28144 14 1 0 5 ORF8-LPFTI84fs  
TAAATCACCCATTTCAGTACATCGATATCGGTAATTATACAGTTTCCTGTT  
tac ctt tta caa tt  
AATTGCCAGGAACCTAAATTGGGTAGTCTTGTAGTGC GTTGTTCGTTCTAT

27384 14 1 0 5 ORF6-D\*61fs  
ACTGAGAATAAATATTCTCAATTAGATGAAGAGCAACCAATGGAGATTGA  
tta aac gaa cat ga  
AAATTATTCTTTTCTTGGCACTGATAAACTCGCTACTTGTGAGCTTTATC

27384 14 1 0 5 ORF7a-MK1fs  
ACTGAGAATAAATATTCTCAATTAGATGAAGAGCAACCAATGGAGATTGA  
tta aac gaa cat ga  
AAATTATTCTTTTCTTGGCACTGATAAACTCGCTACTTGTGAGCTTTATC

27680 9 1 0 5 ORF7a-LYS96del  
CAGATCAGTTTCACCTAAACTGTTTCATCAGACAAGAGGAAGTTCAAGAAC  
ttt act ctc  
CAATTTTCTTATTGTTGCGGCAATAGTGTTTATAAACTTTGCTTCACAC

25512 9 4 0 4 ORF3a-LPF41del  
ACTCCTTCAGATTTTGTTCGCGCTACTGCAACGATACCGATACAAGCCTC  
act ccc ttt  
CGGATGGCTTATTGTTGGCGTTGCACTTCTTGCTGTTTTTCAGAGCGCTTC

21975 9 4 0 4 S-DPFL138V  
TAACGCTACTAATGTTGTTATTAAAGTCTGTGAATTTCAATTTTGTAATG  
atc cat ttt  
TGGGTGTTTATTACCACAAAAACAACAAAAGTTGGATGGAAAGTGAGTTCA

3881 21 4 0 4 ORF1a-IPKEEVK1206del  
GCTTTTTGGAAATGAAGAGTGAAAAGCAAGTTGAACAAAAGATCGCTGAG  
att cct aaa gag gaa gtt aag  
CCATTTATAACTGAAAGTAAACCTTCAGTTGAACAGAGAAAACAAGATGAT

27289 12 4 0 4 ORF6-DYII30del  
AGATATTACTAATTATTATGAGGACTTTTAAAGTTTCCATTTGGAATCTT  
gat tac atc ata  
AACCTCATAATTAAAAATTTATCTAAGTCACTAACTGAGAATAAATATTCT

29737 30 4 0 4  
AGTGTGTAACATTAGGGAGGACTTGAAAGAGCCACCACATTTTCACCGAG  
gcc acg cgg agt acg atc gag tgt aca gtg

AACAATGCTAGGGAGAGCTGCCTATATGGAAGAGCCCTAATGTGTAAAATT

510 12 4 0 4 ORF1a-GHVM82del  
ACAGCCCTATGTGTTTCATCAAACGTTTCGGATGCTCGAACTGCACCTCATG  
gtc atg tta tgg  
TTGAGCTGGTAGCAGAACTCGAAGGCATTTCAGTACGGTCGTAGTGGTGAGA

29760 9 4 0 4  
TGAAAGAGCCACCACATTTTCACCGAGGCCACGCGGAGTACGATCGAGTG  
tac agt gaa  
CAATGCTAGGGAGAGCTGCCTATATGGAAGAGCCCTAATGTGTAAAATTAA

21765 27 4 0 4 S-IHVS GTNGT68del  
TCAGGACTTGTTCTTACCTTTCTTTTCCAATGTTACTTGGTTCCATGCTA  
tac atg tct ctg gga cca atg gta cta  
AGAGGTTTGATAACCCTGTCCTACCATTTAATGATGGTGTTTATTTTGCTT

28407 9 4 0 4 N-LPNN45Y  
GAATGGAGAACGCAGTGGGGCGCGATCAAAACAACGTCGGCCCCAAGGTT  
tac cca ata  
ATACTGCGTCTTGTTTCACCGCTCTCACTCAACATGGCAAGGAAGACCTTA

28150 9 4 0 4 ORF8-FTIN86Y  
ACCCATTTCAGTACATCGATATCGGTAATTATACAGTTTCCTGTTTACCTT  
tta caa tta  
ATTGCCAGGAACCTAAATTGGGTAGTCTTG TAGTGCGTTGTTTCGTTCTATG

25425 21 3 0 4 ORF3a-TVTLKQG12del  
TTACACATAAACGAACTTATGGATTGTTTATGAGAATCTTCACAATTGG  
aac tgt aac ttt gaa gca agg  
TGAAATCAAGGATGCTACTCCTTCAGATTTTGTTTCGCGCTACTGCAACGAT

25425 27 3 0 4 ORF3a-TVTLKQGEI12del  
TTACACATAAACGAACTTATGGATTGTTTATGAGAATCTTCACAATTGG  
aac tgt aac ttt gaa gca agg tga aat  
CAAGGATGCTACTCCTTCAGATTTTGTTTCGCGCTACTGCAACGATACCGAT

27674 21 3 0 4 ORF7a-QELYSPIF94L  
ACGTGCCAGATCAGTTTCACCTAAACTGTTTCATCAGACAAGAGGAAGTTC  
aag aac ttt act ctc caa ttt  
TTCTTATTGTTGCGGCAATAGTGTTTATAACACTTTGCTTCACACTCAAAA

29723 11 3 0 4  
AGCAATCTTTAATCAGTGTGTAACATTAGGGAGGACTTGAAAGAGCCACC  
aca ttt tca cc  
GAGGCCACGCGGAGTACGATCGAGTGTACAGTGAACAATGCTAGGGAGAGC

27525 18 3 0 4 ORF7a-PFHPLA45del  
ACAGTACTTTTAAAAGAACCTTGCTCTTCTGGAACATACGAGGGCAATTC  
acc att tca tcc tct agc  
TGATAACAAATTTGCACTGACTTGCTTTAGCACTCAATTTGCTTTTGCTTG

27599 19 3 0 4 ORF7a-DGVKHVY69fs  
CAAATTTGCACTGACTTGCTTTAGCACTCAATTTGCTTTTGCTTGTCCTG

acg gcg taa aac acg tct a  
TCAGTTACGTGCCAGATCAGTTTCACCTAAACTGTTTCATCAGACAAGAGGA

27571 10 3 0 4 ORF7a-STQF60fs  
ATTCACCATTTCATCCTCTAGCTGATAACAAATTTGCACTGACTTGCTTT  
agc act caa t  
TTGCTTTTGCTTGTCTGACGGCGTAAAACACGTCTATCAGTTACGTGCCA

6375 9 3 0 4 ORF1a-DNL2037del  
AACATCAAATTCGTTTGATGTACTGAAGTCAGAGGACGCGCAGGGAATGG  
ata atc ttg  
CCTGCGAAGATCTAAAACCAGTCTCTGAAGAAGTAGTGGAATCCTACCA

29752 7 3 0 4  
GGAGGACTTGAAAGAGCCACCACATTTTCACCGAGGCCACGCGGAGTACG  
atc gag t  
GTACAGTGAACAATGCTAGGGAGAGCTGCCTATATGGAAGAGCCCTAATGT

27579 9 3 0 4 ORF7a-QFAF62H  
TTTCATCCTCTAGCTGATAACAAATTTGCACTGACTTGCTTTAGCACTCA  
att tgc ttt  
TGCTTGTCCTGACGGCGTAAAACACGTCTATCAGTTACGTGCCAGATCAGT

29441 9 3 0 4 N-QTV390del  
AGAAGAAGGCTGATGAAACTCAAGCCTTACCGCAGAGACAGAAGAAACAG  
caa act gtg  
ACTCTTCTTCTGCTGCAGATTTGGATGATTTCTCAAACAATTGCAACAA

29747 15 3 0 4  
ATTAGGGAGGACTTGAAAGAGCCACCACATTTTCACCGAGGCCACGCGGA  
gta cga tcg agt gta  
CAGTGAACAATGCTAGGGAGAGCTGCCTATATGGAAGAGCCCTAATGTGTA

510 13 3 0 4 ORF1a-GHVMV82fs  
ACAGCCCTATGTGTTTCATCAAACGTTTCGGATGCTCGAACTGCACCTCATG  
gtc atg tta tgg t  
TGAGCTGGTAGCAGAACTCGAAGGCATTCAGTACGGTCGTAGTGGTGAGAC

27788 8 3 0 4 ORF7b-LCF11fs  
ACTCAAAAGAAAGACAGAATGATTGAACTTTCATTAATTGACTTCTATTT  
gtg ctt tt  
TAGCCTTTCTGCTATTCCTTGTTTTAATTATGCTTATTATCTTTTGGTTCT

27796 8 3 0 4 ORF7b-LAF14fs  
GAAAGACAGAATGATTGAACTTTCATTAATTGACTTCTATTTGTGCTTTT  
tag cct tt  
CTGCTATTTCCTTGTTTTAATTATGCTTATTATCTTTTGGTTCTCACTTGAA

29729 32 3 0 4  
CTTTAATCAGTGTGTAACATTAGGGAGGACTTGAAAGAGCCACCACATTT  
tca ccg agg cca cgc gga gta cga tcg agt gt  
ACAGTGAACAATGCTAGGGAGAGCTGCCTATATGGAAGAGCCCTAATGTGT

27795 9 3 0 4 ORF7b-AFL15del

AGAAAGACAGAATGATTGAACTTTCATTAATTGACTTCTATTTGTGCTTT  
tta gcc ttt  
CTGCTATTCCTTGTTTTAATTATGCTTATTATCTTTTGGTTCTCACTTGAA

27608 17 2 0 4 ORF7a-KHVVYL72fs  
ACTGACTTGCTTTAGCACTCAATTTGCTTTTGCTTGTCCTGACGGCGTAA  
aac acg tct atc agt ta  
CGTGCCAGATCAGTTTCACCTAAACTGTTCATCAGACAAGAGGAAGTTCAA

29731 17 2 0 4  
TTAATCAGTGTGTAACATTAGGGAGGACTTGAAAGAGCCACCACATTTTC  
acc gag gcc acg cgg ag  
TACGATCGAGTGTACAGTGAACAATGCTAGGGAGAGCTGCCTATATGGAAG

29741 11 2 0 4  
TGTAACATTAGGGAGGACTTGAAAGAGCCACCACATTTTCACCGAGGCCA  
cgc gga gta cg  
ATCGAGTGTACAGTGAACAATGCTAGGGAGAGCTGCCTATATGGAAGAGCC

27625 9 2 0 4 ORF7a-RAR78del  
CTCAATTTGCTTTTGCTTGTCCTGACGGCGTAAAACACGTCTATCAGTTA  
cgt gcc aga  
TCAGTTTCACCTAAACTGTTCATCAGACAAGAGGAAGTTCAAGAACTTTAC

29755 7 2 0 4  
GGACTTGAAAGAGCCACCACATTTTCACCGAGGCCACGCGGAGTACGATC  
gag tgt a  
CAGTGAACAATGCTAGGGAGAGCTGCCTATATGGAAGAGCCCTAATGTGTA

27556 23 2 0 4 ORF7a-ALTCFSTQ55fs  
GAACATACGAGGGCAATTCACCATTTTCATCCTCTAGCTGATAACAAATTT  
gca ctg act tgc ttt agc act ca  
ATTTGCTTTTGCTTGTCCTGACGGCGTAAAACACGTCTATCAGTTACGTGC

27556 32 2 0 4 ORF7a-ALTCFSTQFAF55fs  
GAACATACGAGGGCAATTCACCATTTTCATCCTCTAGCTGATAACAAATTT  
gca ctg act tgc ttt agc act caa ttt gct tt  
TGCTTGTCCTGACGGCGTAAAACACGTCTATCAGTTACGTGCCAGATCAGT

29742 21 2 0 4  
GTAACATTAGGGAGGACTTGAAAGAGCCACCACATTTTCACCGAGGCCAC  
gcg gag tac gat cga gtg tac  
AGTGAACAATGCTAGGGAGAGCTGCCTATATGGAAGAGCCCTAATGTGTAA

25423 30 2 0 4 ORF3a-GTVTLKQGEI11del  
CATTACACATAAACGAACCTTATGGATTTGTTTATGAGAATCTTCACAATT  
gga act gta act ttg aag caa ggt gaa atc  
AAGGATGCTACTCCTTCAGATTTTGTTCGCGCTACTGCAACGATACCGATA

27682 21 2 0 4 ORF7a-YSPIFLI97del  
GATCAGTTTCACCTAAACTGTTCATCAGACAAGAGGAAGTTCAAGAAGTT  
tac tct cca att ttt ctt att  
GTTGCGGCAATAGTGTTTATAACACTTTGCTTCACACTCAAAAGAAAGACA

28243 11 2 0 4 ORF8-VLDF117fs  
GCGTTGTTTCGTTCTATGAAGACTTTTTAGAGTATCATGACGTTTCGTGTTG  
ttt tag att tc  
ATCTAAACGAACAACTAAAATGTCTGATAATGGACCCCAAAATCAGCGAA

27574 9 1 0 4 ORF7a-TQF61del  
CACCATTTTCATCCTCTAGCTGATAACAAATTTGCACTGACTTGCTTTAGC  
act caa ttt  
GCTTTTGCTTGTCCTGACGGCGTAAAACACGTCTATCAGTTACGTGCCAGA

29746 14 1 0 4  
CATTAGGGAGGACTTGAAAGAGCCACCACATTTTCACCGAGGCCACGCGG  
agt acg atc gag tg  
TACAGTGAACAATGCTAGGGAGAGCTGCCTATATGGAAGAGCCCTAATGTG

3305 21 1 0 4 ORF1a-MELTPVV1014del  
ATCAGACAACACTACTATTCAAACAATTGTTGAGGTTCAACCTCAATTAGAG  
atg gaa ctt aca cca gtt gtt  
CAGACTATTGAAGTGAATAGTTTTAGTGGTTATTTAAAACTTACTGACAAT

27610 28 1 0 4 ORF7a-HVYQLRARSV73fs  
TGACTTGCTTTAGCACTCAATTTGCTTTTGCTTGTCTGACGGCGTAAAA  
cac gtc tat cag tta cgt gcc aga tca g  
TTTCACCTAAACTGTTCATCAGACAAGAGGAAGTTCAAGAACTTTACTCTC

27393 9 1 0 4 ORF7a-MKI1fs  
AAATATTCTCAATTAGATGAAGAGCAACCAATGGAGATTGATTAAACGAA  
cat gaa aat  
TATTCTTTTCTTGGCACTGATAACACTCGCTACTTGTGAGCTTTATCACTA

29754 13 1 0 4  
AGGACTTGAAAGAGCCACCACATTTTCACCGAGGCCACGCGGAGTACGAT  
cga gtg tac agt g  
AACAAATGCTAGGGAGAGCTGCCTATATGGAAGAGCCCTAATGTGTAAAATT

27566 16 1 0 4 ORF7a-CFSTQF58fs  
GGGCAATTCACCATTTTCATCCTCTAGCTGATAACAAATTTGCACTGACTT  
gct tta gca ctc aat t  
TGCTTTTGCTTGTCTGACGGCGTAAAACACGTCTATCAGTTACGTGCCAG

3883 12 1 0 4 ORF1a-PKEE1207del  
TTTTTGGAATGAAGAGTGAAAAGCAAGTTGAACAAAAGATCGCTGAGAT  
tcc taa aga gga  
AGTTAAGCCATTTATAACTGAAAGTAAACCTTCAGTTGAACAGAGAAAACA

28891 12 1 0 4 N-PARM207del  
AGTCGAACAGTTCAAGAAATTCAACTCCAGGCAGCAGTAGGGGAACTTC  
tcc tgc tag aat  
GGCTGGCAATGGCGGTGATGCTGCTCTTGCTTTGCTGCTGCTTGACAGATT

27405 15 1 0 4 ORF7a-ILFLAL4M  
TTAGATGAAGAGCAACCAATGGAGATTGATTAAACGAACATGAAAATTAT  
tct ttt ctt ggc act  
GATAACACTCGCTACTTGTGAGCTTTATCACTACCAAGAGTGTGTTAGAGG

27530 12 1 0 4 ORF7a-FHPLA46S  
ACTTTTAAAAGAACCTTGCTCTTCTGGAACATACGAGGGCAATTCACCAT  
ttc atc ctc tag  
CTGATAACAAATTTGCACTGACTTGCTTTAGCACTCAATTTGCTTTTGCTT

27287 13 1 0 4 ORF6-LDYII29fs  
AGAGATATTACTAATTATTATGAGGACTTTTAAAGTTTCCATTTGGAATC  
ttg att aca tca t  
AAACCTCATAATTAAAAATTTATCTAAGTCACTAACTGAGAATAAATATTC

435 12 3 0 3 ORF1a-EKGV57V  
AGAGGCACGTCAACATCTTAAAGATGGCACTTGTGGCTTAGTAGAAGTTG  
aaa aag gcg ttt  
TGCCTCAACTTGAACAGCCCTATGTGTTTCATCAAACGTTTCGGATGCTCGAA

27607 18 3 0 3 ORF7a-KHVYQL72del  
CACTGACTTGCTTTAGCACTCAATTTGCTTTTGCTTGTCTGACGGCGTA  
aaa cac gtc tat cag tta  
CGTGCCAGATCAGTTTCACCTAACTGTTCATCAGACAAGAGGAAGTTCAA

27897 10 3 0 3 ORF8-KFLV2fs  
CACTTGAAGTGAAGATCATAATGAACTTGTACGCCTAAACGAACATG  
aaa ttt ctt g  
TTTTCTTAGGAATCATCACAAGTGTAGCTGCATTTACCAAGAATGTAGTT

29731 13 3 0 3  
TTAATCAGTGTGTAACATTAGGGAGGACTTGAAAGAGCCACCACATTTTC  
acc gag gcc acg c  
GGAGTACGATCGAGTGTACAGTGAACAATGCTAGGGAGAGCTGCCTATATG

27624 17 3 0 3 ORF7a-LRARSV77fs  
ACTCAATTTGCTTTTGCTTGTCTGACGGCGTAAAACACGTCTATCAGTT  
acg tgc cag atc agt tt  
CACCTAACTGTTCATCAGACAAGAGGAAGTTCAAGAAGTTTACTCTCCAA

27673 9 3 0 3 ORF7a-QEL94del  
TACGTGCCAGATCAGTTTCACCTAACTGTTCATCAGACAAGAGGAAGTT  
caa gaa ctt  
TACTCTCCAATTTTCTTATTGTTGCGGCAATAGTGTTTATAACACTTTGC

25416 9 3 0 3 ORF3a-FTIG8L  
CAAATTACATTACATAAACGAAGTTATGGATTTGTTTATGAGAATCTT  
cac aat tgg  
AACTGTAAGTTTGAAGCAAGGTGAAATCAAGGATGCTACTCCTTCAGATTT

25416 15 3 0 3 ORF3a-FTIGTV8L  
CAAATTACATTACATAAACGAAGTTATGGATTTGTTTATGAGAATCTT  
cac aat tgg aac tgt  
AACTTTGAAGCAAGGTGAAATCAAGGATGCTACTCCTTCAGATTTTGTTCG

28107 11 3 0 3 ORF8-QYID72fs  
CACCTTTAATTGAATTGTGCGTGGATGAGGCTGGTTCTAAATCACCCATT  
cag tac atc ga



TATCGGTAATTATACAGTTTCCTGTTTACCTTTTACAATTAATTGCCAGGA

29743 9 3 0 3  
TAACATTAGGGAGGACTTGAAAGAGCCACCACATTTTCACCGAGGCCACG  
cgg agt acg  
ATCGAGTGTACAGTGAACAATGCTAGGGAGAGCTGCCTATATGGAAGAGCC

28896 12 3 0 3 N-ARMA208del  
CAACAGTTCAAGAAATTCAACTCCAGGCAGCAGTAGGGGAACTTCTCCTG  
cta gaa tgg ctg  
GCAATGGCGGTGATGCTGCTCTTGCTTTGCTGCTGCTTGACAGATTGAACC

27676 16 3 0 3 ORF7a-ELYSPI95fs  
GTGCCAGATCAGTTTCACCTAAACTGTTTCATCAGACAAGAGGAAGTTCAA  
gaa ctt tac tct cca a  
TTTTTCTTATTGTTGCGGCAATAGTGTTTATAACACTTTGCTTCACACTCA

29734 28 3 0 3  
ATCAGTGTGTAACATTAGGGAGGACTTGAAAGAGCCACCACATTTTCACC  
gag gcc acg cgg agt acg atc gag tgt a  
CAGTGAACAATGCTAGGGAGAGCTGCCTATATGGAAGAGCCCTAATGTGTA

27572 15 3 0 3 ORF7a-STQFAF60I  
TTCACCATTTCATCCTCTAGCTGATAACAAATTTGCACTGACTTGCTTTA  
gca ctc aat ttg ctt  
TTGCTTGTCTGACGGCGTAAAACACGTCTATCAGTTACGTGCCAGATCAG

29742 19 3 0 3  
GTAACATTAGGGAGGACTTGAAAGAGCCACCACATTTTCACCGAGGCCAC  
gcg gag tac gat cga gtg t  
ACAGTGAACAATGCTAGGGAGAGCTGCCTATATGGAAGAGCCCTAATGTGT

27593 25 3 0 3 ORF7a-CPDGVKHVY67fs  
TGATAACAAATTTGCACTGACTTGCTTTAGCACTCAATTTGCTTTTGCTT  
gtc ctg acg gcg taa aac acg tct a  
TCAGTTACGTGCCAGATCAGTTTCACCTAAACTGTTTCATCAGACAAGAGGA

29757 10 3 0 3  
ACTTGAAAGAGCCACCACATTTTCACCGAGGCCACGCGGAGTACGATCGA  
gtg tac agt g  
AACAATGCTAGGGAGAGCTGCCTATATGGAAGAGCCCTAATGTGTAAAATT

29748 8 3 0 3  
TTAGGGAGGACTTGAAAGAGCCACCACATTTTCACCGAGGCCACGCGGAG  
tac gat cg  
AGTGTACAGTGAACAATGCTAGGGAGAGCTGCCTATATGGAAGAGCCCTAA

28246 7 3 0 3 ORF8-LDF118fs  
TTGTTTCGTTCTATGAAGACTTTTATAGAGTATCATGACGTTTCGTGTTGTTT  
tag att t  
CATCTAAACGAACAACTAAAATGTCTGATAATGGACCCCAAATCAGCGA

29753 16 3 0 3  
GAGGACTTGAAAGAGCCACCACATTTTCACCGAGGCCACGCGGAGTACGA

tcg agt gta cag tga a  
CAATGCTAGGGAGAGCTGCCTATATGGAAGAGCCCTAATGTGTAAAATTA

27266 24 3 0 3 ORF6-FKVSIWNLD22Y  
TGA CTTTCAGGTTACTATAGCAGAGATATTACTAATTATTATGAGGACTT  
tta aag ttt cca ttt gga atc ttg  
ATTACATCATAAACCTCATAATTA AAAATTTATCTAAGTCACTAACTGAGA

3836 9 3 0 3 ORF1a-LEM1191del  
ACTTAGCTGTCTTTGATAAAAATCTCTATGACAACTTGTTTCAAGCTTT  
ttg gaa atg  
AAGAGTGAAAAGCAAGTTGAACAAAAGATCGCTGAGATTCCTAAAGAGGAA

27674 13 2 0 3 ORF7a-QELYS94fs  
ACGTGCCAGATCAGTTTCACCTAACTGTTTCATCAGACAAGAGGAAGTTC  
aag aac ttt act c  
TCCAATTTTCTTATTGTTGCGGCAATAGTGTTTATAACACTTTGCTTCAC

3336 12 2 0 3 ORF1a-EVNSF1024V  
GGTTCAACCTCAATTAGAGATGGAACCTTACACCAGTTGTTTCAGACTATTG  
aag tga ata gtt  
TTAGTGTTATTTA AAACTTACTGACAATGTATACATTAAAAATGCAGACA

27548 8 2 0 3 ORF7a-NKF52fs  
CTCTTCTGGAACATACGAGGGCAATTCACCATTTCATCCTCTAGCTGATA  
aca aat tt  
GCACTGACTTGCTTTAGCACTCAATTTGCTTTTGCTTGTCTGACGGCGTA

29723 10 2 0 3  
AGCAATCTTTAATCAGTGTGTAACATTAGGGAGGACTTGAAAGAGCCACC  
aca ttt tca c  
CGAGGCCACGCGGAGTACGATCGAGTGTACAGTGAACAATGCTAGGGAGAG

21634 12 2 0 3 S-LPPAY24F  
TTGCCACTAGTCTCTAGTCAGTGTGTTAATCTTACAACCAGAACTCAATT  
acc ccc tgc ata  
CACTAATTCTTTCACACGTGGTGTATTACCCTGACAAAGTTTTTCAGATC

27574 11 2 0 3 ORF7a-TQFA61fs  
CACCATTTTCATCCTCTAGCTGATAACAAATTTGCACTGACTTGCTTTAGC  
act caa ttt gc  
TTTTGCTTGTCTGACGGCGTAAACACGTCTATCAGTTACGTGCCAGATC

29752 10 2 0 3  
GGAGGACTTGAAAGAGCCACCACATTTTCACCGAGGCCACGCGGAGTACG  
atc gag tgt a  
CAGTGAACAATGCTAGGGAGAGCTGCCTATATGGAAGAGCCCTAATGTGTA

27770 13 2 0 3 ORF7b-SLIDF5fs  
TATAACACTTTGCTTCACACTCAAAAGAAAGACAGAATGATTGAACTTTC  
att aat tga ctt c  
TATTTGTGCTTTT TAGCCTTCTGCTATTCCTTGTTTTAATTATGCTTATT

29686 8 2 0 3

ATAGCACAAGTAGATGTAGTTAACTTTAATCTCACATAGCAATCTTTAAT  
cag tgt gt  
AACATTAGGGAGGACTTGAAAGAGCCACCACATTTTCACCGAGGCCACGCG

28146 14 2 0 3 ORF8-PFTIN85fs  
AATCACCCATTTCAGTACATCGATATCGGTAATTATACAGTTTCCTGTTTA  
cct ttt aca att aa  
TTGCCAGGAACCTAAATTGGGTAGTCTTGTAGTGCGTTGTTTCGTTCTATGA

29741 7 2 0 3  
TGTAACATTAGGGAGGACTTGAAAGAGCCACCACATTTTCACCGAGGCCA  
cgc gga g  
TACGATCGAGTGTACAGTGAACAATGCTAGGGAGAGCTGCCTATATGGAAG

29741 26 2 0 3  
TGTAACATTAGGGAGGACTTGAAAGAGCCACCACATTTTCACCGAGGCCA  
cgc gga gta cga tcg agt gta cag tg  
AACAAATGCTAGGGAGAGCTGCCTATATGGAAGAGCCCTAATGTGTAAAATT

25424 15 2 0 3 ORF3a-GTVTLK11E  
ATTACACATAAACGAACCTTATGGATTTGTTTATGAGAATCTTCACAATTG  
gaa ctg taa ctt tga  
AGCAAGGTGAAATCAAGGATGCTACTCCTTCAGATTTTGTTCGCGCTACTG

27376 10 2 0 3 ORF6-EID\*59fs  
AGTCACTAACTGAGAATAAATATTCTCAATTAGATGAAGAGCAACCAATG  
gag att gat t  
AAACGAACATGAAAATTATTCTTTTCTTGGCACTGATAAACTCGCTACTT

29745 11 2 0 3  
ACATTAGGGAGGACTTGAAAGAGCCACCACATTTTCACCGAGGCCACGCG  
gag tac gat cg  
AGTGTACAGTGAACAATGCTAGGGAGAGCTGCCTATATGGAAGAGCCCTAA

27566 8 2 0 3 ORF7a-CFS58fs  
GGGCAATTCACCATTTTCATCCTCTAGCTGATAACAAATTTGCACTGACTT  
gct tta gc  
ACTCAATTTGCTTTTGCTTGTCTGACGGCGTAAACACGTCTATCAGTTA

29736 16 2 0 3  
CAGTGTGTAACATTAGGGAGGACTTGAAAGAGCCACCACATTTTCACCGA  
ggc cac gcg gag tac g  
ATCGAGTGTACAGTGAACAATGCTAGGGAGAGCTGCCTATATGGAAGAGCC

29736 17 2 0 3  
CAGTGTGTAACATTAGGGAGGACTTGAAAGAGCCACCACATTTTCACCGA  
ggc cac gcg gag tac ga  
TCGAGTGTACAGTGAACAATGCTAGGGAGAGCTGCCTATATGGAAGAGCCC

29759 17 2 0 3  
TTGAAAGAGCCACCACATTTTCACCGAGGCCACGCGGAGTACGATCGAGT  
gta cag tga aca atg ct  
AGGGAGAGCTGCCTATATGGAAGAGCCCTAATGTGTAAAATTAATTTTAGT

27576 7 2 0 3 ORF7a-TQF61fs  
CCATTTTCATCCTCTAGCTGATAACAAATTTGCACTGACTTGCTTTAGCAC  
tca att t  
GCTTTTGCTTGTCTGACGGCGTAAACACGTCTATCAGTTACGTGCCAGA

27640 7 2 0 3 ORF7a-SPK83fs  
CTTGTCTGACGGCGTAAACACGTCTATCAGTTACGTGCCAGATCAGTT  
tca cct a  
AACTGTTTCATCAGACAAGAGGAAGTTCAAGAACTTTACTCTCCAATTTTTC

28150 8 2 0 3 ORF8-FTI86fs  
ACCCATTCAGTACATCGATATCGGTAATTATACAGTTTCCTGTTTACCTT  
tta caa tt  
AATTGCCAGGAACCTAAATTGGGTAGTCTTGTAGTGCGTTGTTTCGTTCTAT

28066 31 2 0 3 ORF8-IELCVDEAGSK58fs  
CTATTCTAAATGGTATATTAGAGTAGGAGCTAGAAAATCAGCACCTTTAA  
ttg aat tgt gcg tgg atg agg ctg gtt cta a  
ATCACCCATTCAGTACATCGATATCGGTAATTATACAGTTTCCTGTTTACC

21981 12 2 0 3 S-FLGV140del  
TACTAATGTTGTTATTAAAGTCTGTGAATTTCAATTTTGTAATGATCCAT  
ttt tgg gtg ttt  
ATTACCACAAAAACAACAAAAGTTGGATGGAAAGTGAGTTCAGAGTTTATT

27677 15 1 0 3 ORF7a-ELYSPI95V  
TGCCAGATCAGTTTCACCTAAACTGTTTCATCAGACAAGAGGAAGTTCAAG  
aac ttt act ctc caa  
TTTTTCTTATTGTTGCGGCAATAGTGTTTATAACACTTTGCTTCACACTCA

28210 9 1 0 3 ORF8-EDFL106V  
TTGCCAGGAACCTAAATTGGGTAGTCTTGTAGTGCGTTGTTTCGTTCTATG  
aag act ttt  
TAGAGTATCATGACGTTTCGTGTTGTTTTAGATTTTCATCTAAACGAACAAAC

28231 15 1 0 3 ORF8-DVRVVL113V  
TAGTCTTGTAGTGCGTTGTTTCGTTCTATGAAGACTTTTTAGAGTATCATG  
acg ttc gtg ttg ttt  
TAGATTTTCATCTAAACGAACAAACTAAAATGTCTGATAATGGACCCCCAAAA

6610 9 1 0 3 ORF1a-RVLG2115S  
TATGTAGACAATTCTAGTCTTACTATTAAGAAACCTAATGAATTATCTAG  
agt att agg  
TTTGAAAACCCTTGCTACTCATGGTTTAGCTGCTGTTAATAGTGTCCCTTG

27714 21 1 0 3 ORF7a-VFITLCF108del  
GAGGAAGTTCAAGAACTTTACTCTCCAATTTTCTTATTGTTGCGGCAAT  
agt gtt tat aac act ttg ctt  
CACACTCAAAGAAAGACAGAATGATTGAACTTTCATTAATTGACTTCTAT

6551 15 1 0 3 ORF1a-MAAYV2096del  
CAGCAAATAATAGTTTAAAAATTACAGAAGAGGTTGGCCACACAGATCTA  
atg gct gct tat gta  
GACAATTCTAGTCTTACTATTAAGAAACCTAATGAATTATCTAGAGTATTA

27950 7 1 0 3 ORF8-ECS19fs  
 TTTCTTGT TTTCTTAGGAATCATCAAACTGTAGCTGCATTTACCAAGA  
 atg tag t  
 TTACAGTCATGTACTCAACATCAACCATATGTAGTTGATGACCCGTGTCCT

513 15 1 0 3 ORF1a-HVMVE83del  
 GCCCTATGTGTTTCATCAAACGTTTCGGATGCTCGAACTGCACCTCATGGTC  
 atg tta tgg ttg agc  
 TGGTAGCAGAACTCGAAGGCATTTCAGTACGGTCGTAGTGGTGAGACACTTG

27579 19 1 0 3 ORF7a-QFAFACP62fs  
 TTTCATCCTCTAGCTGATAACAAATTTGCACTGACTTGCTTTAGCACTCA  
 att tgc ttt tgc ttg tcc t  
 GACGGCGTAAAACACGTCTATCAGTTACGTGCCAGATCAGTTTCACCTAAA

3290 24 1 0 3 ORF1a-QPQLEMEL1009del  
 ACGGCAGTGAGGACAATCAGACAACACTACTATTCAAACAATTGTTGAGGTT  
 caa cct caa tta gag atg gaa ctt  
 ACACCAGTTGTTTCAGACTATTGAAGTGAATAGTTTTAGTGGTTATTTAAAA

27920 28 1 0 3 ORF8-IITTVA AFHQ9fs  
 GAAACTTGTCACGCCTAAACGAACATGAAATTTCTTGTTTTCTTAGGAAT  
 cat cac aac tgt agc tgc att tca cca a  
 GAATGTAGTTTACAGTCATGTACTCAACATCAACCATATGTAGTTGATGAC

27370 22 1 0 3 ORF6-PMEID\*57del  
 TATCTAAGTCACTAACTGAGAATAAATATTCTCAATTAGATGAAGAGCAA  
 cca atg gag att gat taa acg a  
 ACATGAAAATTATTCTTTTCTTGCGACTGATAACACTCGCTACTTGTGAGC

27275 8 1 0 3 ORF6-SIW25fs  
 GGTTACTATAGCAGAGATATTACTAATTATTATGAGGACTTTTAAAGTTT  
 cca ttt gg  
 AATCTTGATTACATCATAAACCTCATAATTA AAAAATTTATCTAAGTCACTA

28005 13 1 0 3 ORF8-PIHFY38fs  
 GTTTACAGTCATGTACTCAACATCAACCATATGTAGTTGATGACCCGTGT  
 cct att cac ttc t  
 ATTCTAAATGGTATATTAGAGTAGGAGCTAGAAAATCAGCACCTTTAATTG

27595 7 1 0 3 ORF7a-PDG68fs  
 ATAACAAATTTGCACTGACTTGCTTTAGCACTCAATTTGCTTTTGCTTGT  
 cct gac g  
 GCGTAAAACACGTCTATCAGTTACGTGCCAGATCAGTTTCACCTAAACTGT

29733 19 1 0 3  
 AATCAGTGTGTAACATTAGGGAGGACTTGAAAGAGCCACCACATTTTCAC  
 cga ggc cac gcg gag tac g  
 ATCGAGTGTACAGTGAACAATGCTAGGGAGAGCTGCCTATATGGAAGAGCC

29578 12 1 0 3 ORF10-AFPF8del  
 GCCTAAACTCATGCAGACCACACAAGGCAGATGGGCTATATAAACGTTTT  
 cgc ttt tcc gtt

TACGATATATAGTCTACTCTTGTGCAGAATGAATTCTCGTAACTACATAGC

27625 8 1 0 3 ORF7a-RAR78fs  
CTCAATTTGCTTTTGCTTGTCTGACGGCGTAAAACACGTCTATCAGTTA  
cgt gcc ag  
ATCAGTTTCACCTAAACTGTTTCATCAGACAAGAGGAAGTTCAAGAACTTTA

25549 11 1 0 3 ORF3a-LAVF53fs  
CGATACAAGCCTCACTCCCTTTCTGGATGGCTTATTGTTGGCGTTGCACTT  
ctt gct gtt tt  
TCAGAGCGCTTCCAAAATCATAACCCTCAAAAAGAGATGGCAACTAGCACT

27765 10 1 0 3 ORF7b-LSLI4fs  
GTGTTTATAACACTTTGCTTCACACTCAAAAGAAAGACAGAATGATTGAA  
ctt tca tta a  
TTGACTTCTATTTGTGCTTTTTAGCCTTTCTGCTATTCCTTGTTTTAATTA

25517 15 1 0 3 ORF3a-PFGWLI42L  
TTCAGATTTTGTTTCGCGCTACTGCAACGATACCGATACAAGCCTCACTCC  
ctt tcg gat ggc tta  
TTGTTGGCGTTGCACTTCTTGCTGTTTTTCAGAGCGCTTCCAAAATCATAA

28899 12 1 0 3 N-RMAG209del  
CAGTTCAAGAAATTCAACTCCAGGCAGCAGTAGGGGAAGTTCTCCTGCTA  
gaa tgg ctg gca  
ATGGCGGTGATGCTGCTCTTGCTTTGCTGCTGCTTGACAGATTGAACCAGC

25444 9 1 0 3 ORF3a-GEI18del  
TGGATTTGTTTATGAGAATCTTCACAATTGGAAGTGTAACTTTGAAGCAA  
ggt gaa atc  
AAGGATGCTACTCCTTCAGATTTTGTTTCGCGCTACTGCAACGATACCGATA

29759 15 1 0 3  
TTGAAAGAGCCACCACATTTTCACCGAGGCCACGCGGAGTACGATCGAGT  
gta cag tga aca atg  
CTAGGGAGAGCTGCCTATATGGAAGAGCCCTAATGTGTAAAATTAATTTTA

6576 21 1 0 3 ORF1a-SLTIKBP2104del  
AGAAGAGGTTGGCCACACAGATCTAATGGCTGCTTATGTAGACAATTCTA  
gtc tta cta tta aga aac cta  
ATGAATTATCTAGAGTATTAGGTTTGAAAACCCTTGCTACTCATGGTTTAG

28237 18 1 0 3 ORF8-RVVLDFI115L  
TGTAGTGC GTTGTTCGTTCTATGAAGACTTTTGTAGAGTATCATGACGTTC  
gtg ttg ttt tag att tca  
TCTAAACGAACAACTAAAATGTCTGATAATGGACCCCAAAATCAGCGAAA

28151 8 1 0 3 ORF8-FTI86fs  
CCCATTCAGTACATCGATATCGGTAATTATACAGTTTCCTGTTTACCTTT  
tac aat ta  
ATTGCCAGGAACCTAAATTGGGTAGTCTTG TAGTGCGTTGTTTCGTTCTATG

3907 30 1 0 3 ORF1a-FITESKPSVEQ1214L  
CAAGTTGAACAAAAGATCGCTGAGATTCTCTAAAGAGGAAGTTAAGCCATT

tat aac tga aag taa acc ttc agt tga aca  
GAGAAAACAAGATGATAAGAAAATCAAAGCTTGTGTTGAAGAAGTTACAAC

29729 26 1 0 3  
CTTTAATCAGTGTGTAACATTAGGGAGGACTTGAAAGAGCCACCACATTT  
tca ccg agg cca cgc gga gta cga tc  
GAGTGTACAGTGAACAATGCTAGGGAGAGCTGCCTATATGGAAGAGCCCTA

29753 13 1 0 3  
GAGGACTTGAAAGAGCCACCACATTTTCACCGAGGCCACGCGGAGTACGA  
tcg agt gta cag t  
GAACAATGCTAGGGAGAGCTGCCTATATGGAAGAGCCCTAATGTGTAAAAT

27696 28 1 0 3 ORF7a-FLIVAAIVFI101fs  
AAACTGTTTCATCAGACAAGAGGAAGTTCAAGAAGTTTACTCTCCAATTTT  
tct tat tgt tgc ggc aat agt gtt tat a  
ACACTTTGCTTCACACTCAAAAGAAAGACAGAATGATTGAACTTTCATTAA

27761 8 1 0 3 ORF7b-IEL2fs  
AATAGTGTTTATAACACTTTGCTTCACACTCAAAAGAAAGACAGAATGAT  
tga act tt  
CATTAATTGACTTCTATTTGTGCTTTTTAGCCTTTCTGCTATTCCTTGTTT

29758 8 1 0 3  
CTTGAAAGAGCCACCACATTTTCACCGAGGCCACGCGGAGTACGATCGAG  
tgt aca gt  
GAACAATGCTAGGGAGAGCTGCCTATATGGAAGAGCCCTAATGTGTAAAAT

29680 7 1 0 3  
AACTACATAGCACAAGTAGATGTAGTTAACTTTAATCTCACATAGCAATC  
ttt aat c  
AGTGTGTAACATTAGGGAGGACTTGAAAGAGCCACCACATTTTCACCGAGG

27585 8 1 0 3 ORF7a-AFA64fs  
CCTCTAGCTGATAACAAATTTGCACTGACTTGCTTTAGCACTCAATTTGC  
ttt tgc tt  
GTCCTGACGGCGTAAAACACGTCTATCAGTTACGTGCCAGATCAGTTTCAC
