# Supplementary material for: Deletions across the SARS-CoV-2 Genome: Molecular Mechanisms and Putative Functional Consequences of Deletions in Accessory Genes
Source: MDPI journal article supplement (doi:10.3390/microorganisms11010229), 2023-01-16
Supplement: s1 [file s1]

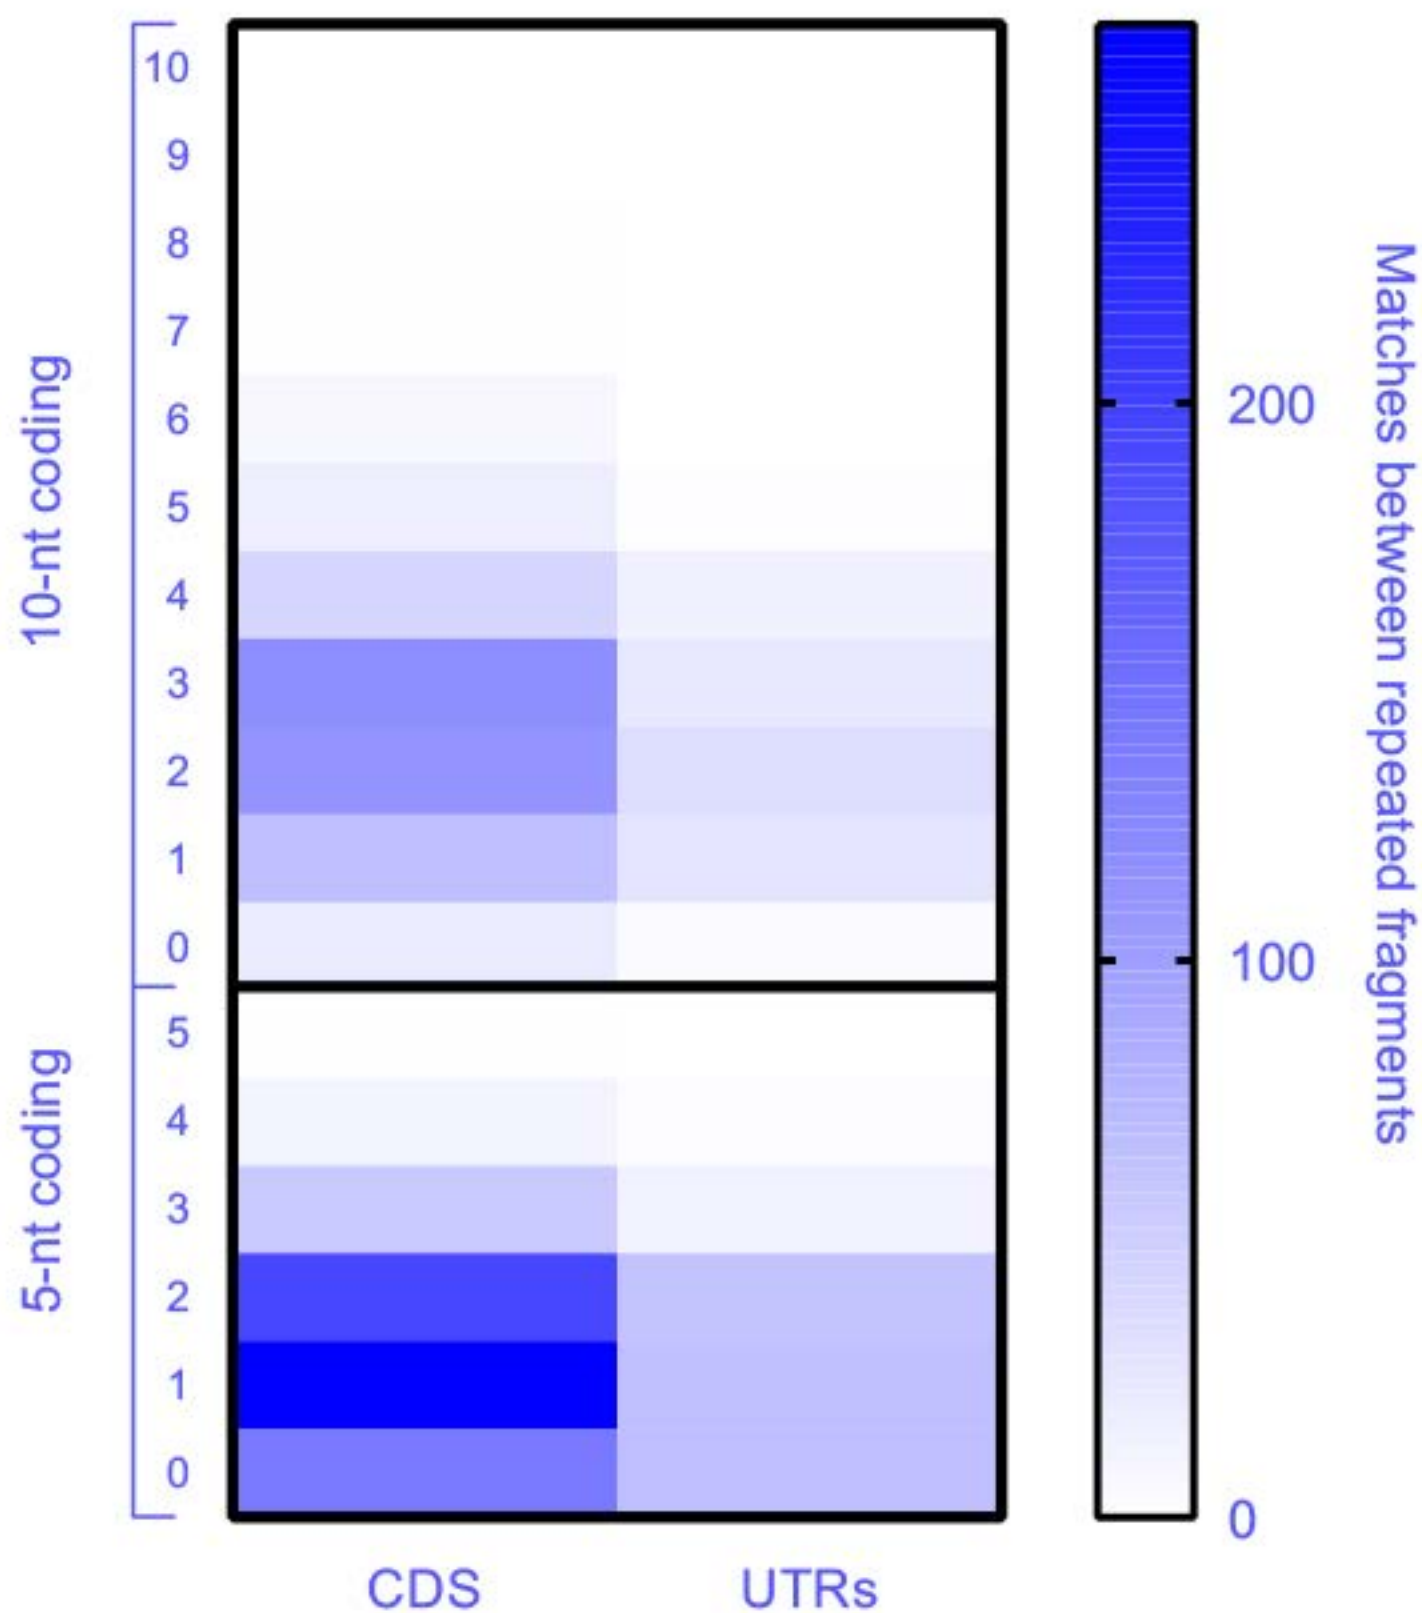

**Figure S6.** Heatmap of the association of long deletions with inverted repeats in UTR and CDS, considering Windows = 5 and 10 nucleotides, expressed as number of matches between repeated fragments.
