# Supplementary material for: Deletions across the SARS-CoV-2 Genome: Molecular Mechanisms and Putative Functional Consequences of Deletions in Accessory Genes
Source: MDPI journal article supplement (doi:10.3390/microorganisms11010229), 2023-01-16
Supplement: s1 [file s1]

Supplementary Figure S4. Contexts of short deletions in the bin #10 of ORF8.  
The 1st number is the position and the 5th number is the number of instances  
followed by gene names.

28223    3    1    0    3 ORF8-EY110D  
AAATTGGGTAGTCTTGTAGTGCGTTGTTTCGTTCTATGAAGACTTTTTAGA  
gta  
TCATGACGTTTCGTGTTGTTTTAGATTTCATCTAAACGAACAACTAAAATG

28228    1    1    0    3 ORF8-H112fs  
GGGTAGTCTTGTAGTGCGTTGTTTCGTTCTATGAAGACTTTTTAGAGTATC  
a  
TGACGTTTCGTGTTGTTTTAGATTTCATCTAAACGAACAACTAAAATGTCT

28231    3    1    0    3 ORF8-D113  
TAGTCTTGTAGTGCGTTGTTTCGTTCTATGAAGACTTTTTAGAGTATCATG  
acg  
TTCGTGTTGTTTTAGATTTCATCTAAACGAACAACTAAAATGTCTGATAA

28236    6    2    0    3 ORF8-RV115  
TTGTAGTGCGTTGTTTCGTTCTATGAAGACTTTTTAGAGTATCATGACGTT  
cgt gtt  
GTTTTAGATTTCATCTAAACGAACAACTAAAATGTCTGATAATGGACCCC

28240    2    4    0    115 ORF8-V116fs  
AGTGCGTTGTTTCGTTCTATGAAGACTTTTTAGAGTATCATGACGTTTCGTG  
tt  
GTTTTAGATTTCATCTAAACGAACAACTAAAATGTCTGATAATGGACCCC

28241    6    2    0    3 ORF8-VL117  
GTGCGTTGTTTCGTTCTATGAAGACTTTTTAGAGTATCATGACGTTTCGTGT  
tgt ttt  
AGATTTCATCTAAACGAACAACTAAAATGTCTGATAATGGACCCCCAAAAT

28242    3    29    0    56 ORF8-V117  
TGCGTTGTTTCGTTCTATGAAGACTTTTTAGAGTATCATGACGTTTCGTGTT  
gtt  
TTAGATTTCATCTAAACGAACAACTAAAATGTCTGATAATGGACCCCCAAA

28242    4    20    0    47 ORF8-VL117fs  
TGCGTTGTTTCGTTCTATGAAGACTTTTTAGAGTATCATGACGTTTCGTGTT  
gttt  
AGATTTCATCTAAACGAACAACTAAAATGTCTGATAATGGACCCCCAAA

28242    2    3    0    40 ORF8-V117fs  
TGCGTTGTTTCGTTCTATGAAGACTTTTTAGAGTATCATGACGTTTCGTGTT  
gt  
TTTAGATTTCATCTAAACGAACAACTAAAATGTCTGATAATGGACCCCCAA

28242    5    14    0    32 ORF8-VL117fs  
TGCGTTGTTTCGTTCTATGAAGACTTTTTAGAGTATCATGACGTTTCGTGTT  
gtt tt

AGATTTTCATCTAAACGAACAAACTAAAATGTCTGATAATGGACCCCCAAAAT

28242 1 4 0 4 ORF8-V117fs  
TGC GTT G TT C GTT CTATGAAGACTTTTTAGAGTATCATGACGTTTCGTGTT  
g  
TTTTAGATTTTCATCTAAACGAACAAACTAAAATGTCTGATAATGGACCCCCA

28243 6 4 0 8 ORF8-VL117  
GCGTTGTTTCGTTCTATGAAGACTTTTTAGAGTATCATGACGTTTCGTGTTG  
ttt tag  
ATTTTCATCTAAACGAACAAACTAAAATGTCTGATAATGGACCCCCAAAATCA

28244 3 5 0 6 ORF8-L118  
CGTTGTTCGTTCTATGAAGACTTTTTAGAGTATCATGACGTTTCGTGTTGT  
ttt  
AGATTTTCATCTAAACGAACAAACTAAAATGTCTGATAATGGACCCCCAAAAT

28245 3 3 0 8 ORF8-L118  
GTTGTTCGTTCTATGAAGACTTTTTAGAGTATCATGACGTTTCGTGTTGTT  
tta  
GATTTTCATCTAAACGAACAAACTAAAATGTCTGATAATGGACCCCCAAAATC

28246 2 1 0 4 ORF8-L118fs  
TTGTTTCGTTCTATGAAGACTTTTTAGAGTATCATGACGTTTCGTGTTGTTT  
ta  
GATTTTCATCTAAACGAACAAACTAAAATGTCTGATAATGGACCCCCAAAATC

28247 1 5 0 104 ORF8-L118fs  
TGTTTCGTTCTATGAAGACTTTTTAGAGTATCATGACGTTTCGTGTTGTTTT  
a  
GATTTTCATCTAAACGAACAAACTAAAATGTCTGATAATGGACCCCCAAAATC

28247 5 7 0 15 ORF8-LD118fs  
TGTTTCGTTCTATGAAGACTTTTTAGAGTATCATGACGTTTCGTGTTGTTTT  
aga tt  
TCATCTAAACGAACAAACTAAAATGTCTGATAATGGACCCCCAAAATCAGCG

28247 6 2 0 8 ORF8-LD118  
TGTTTCGTTCTATGAAGACTTTTTAGAGTATCATGACGTTTCGTGTTGTTTT  
aga ttt  
CATCTAAACGAACAAACTAAAATGTCTGATAATGGACCCCCAAAATCAGCGA

28248 6 25 83 52612 ORF8-DF119  
GTTTCGTTCTATGAAGACTTTTTAGAGTATCATGACGTTTCGTGTTGTTTTA  
gat ttc  
ATCTAAACGAACAAACTAAAATGTCTGATAATGGACCCCCAAAATCAGCGAA

28248 4 11 1 52 ORF8-DF119fs  
GTTTCGTTCTATGAAGACTTTTTAGAGTATCATGACGTTTCGTGTTGTTTTA  
gat t  
TCATCTAAACGAACAAACTAAAATGTCTGATAATGGACCCCCAAAATCAGCG

28248 1 14 0 22 ORF8-D119fs  
GTTTCGTTCTATGAAGACTTTTTAGAGTATCATGACGTTTCGTGTTGTTTTA

g  
ATTTCATCTAAACGAACAAACTAAAATGTCTGATAATGGACCCCAAAATCA

28248 5 3 0 7 ORF8-DF119fs  
GTTTCGTTCTATGAAGACTTTTTAGAGTATCATGACGTTTCGTGTTGTTTTA  
gat tt  
CATCTAAACGAACAAACTAAAATGTCTGATAATGGACCCCAAAATCAGCGA

28248 2 2 0 3 ORF8-D119fs  
GTTTCGTTCTATGAAGACTTTTTAGAGTATCATGACGTTTCGTGTTGTTTTA  
ga  
TTTCATCTAAACGAACAAACTAAAATGTCTGATAATGGACCCCAAAATCAG

28249 2 4 0 100 ORF8-D119fs  
TTCGTTCTATGAAGACTTTTTAGAGTATCATGACGTTTCGTGTTGTTTATAG  
at  
TTCATCTAAACGAACAAACTAAAATGTCTGATAATGGACCCCAAAATCAGC

28250 3 2 0 8 ORF8-F120  
TCGTTCTATGAAGACTTTTTAGAGTATCATGACGTTTCGTGTTGTTTATAGA  
ttt  
CATCTAAACGAACAAACTAAAATGTCTGATAATGGACCCCAAAATCAGCGA

28252 2 11 0 17 ORF8-F120fs  
GTTCTATGAAGACTTTTTAGAGTATCATGACGTTTCGTGTTGTTTATAGATT  
tc  
ATCTAAACGAACAAACTAAAATGTCTGATAATGGACCCCAAAATCAGCGAA

28252 1 4 0 4 ORF8-F120fs  
GTTCTATGAAGACTTTTTAGAGTATCATGACGTTTCGTGTTGTTTATAGATT  
t  
CATCTAAACGAACAAACTAAAATGTCTGATAATGGACCCCAAAATCAGCGA

28253 2 3 0 4 ORF8-F120fs  
TTCTATGAAGACTTTTTAGAGTATCATGACGTTTCGTGTTGTTTATAGATTT  
ca  
TCTAAACGAACAAACTAAAATGTCTGATAATGGACCCCAAAATCAGCGAAA

28253 5 6 0 7 ORF8-F120fs  
TTCTATGAAGACTTTTTAGAGTATCATGACGTTTCGTGTTGTTTATAGATTT  
cat ct  
AAACGAACAAACTAAAATGTCTGATAATGGACCCCAAAATCAGCGAAATGC

28253 1 2 0 5 ORF8-F120fs  
TTCTATGAAGACTTTTTAGAGTATCATGACGTTTCGTGTTGTTTATAGATTT  
c  
ATCTAAACGAACAAACTAAAATGTCTGATAATGGACCCCAAAATCAGCGAA

28254 1 534 23 3208 ORF8-I121fs  
TCTATGAAGACTTTTTAGAGTATCATGACGTTTCGTGTTGTTTATAGATTTC  
a  
TCTAAACGAACAAACTAAAATGTCTGATAATGGACCCCAAAATCAGCGAAA

28254 3 5 0 43 ORF8-I121

TCTATGAAGACTTTTTAGAGTATCATGACGTTTCGTGTTGTTTTAGATTTC  
atc  
TAAACGAACAAACTAAAATGTCTGATAATGGACCCCAAAATCAGCGAAATG

28254 2 3 0 9 ORF8-II121fs  
TCTATGAAGACTTTTTAGAGTATCATGACGTTTCGTGTTGTTTTAGATTTC  
at  
CTAAACGAACAAACTAAAATGTCTGATAATGGACCCCAAAATCAGCGAAAT

28256 1 5 0 8 ORF8-II121fs  
TATGAAGACTTTTTAGAGTATCATGACGTTTCGTGTTGTTTTAGATTTCAT  
c  
TAAACGAACAAACTAAAATGTCTGATAATGGACCCCAAAATCAGCGAAATG

28257 1 2 0 3 ORF8-\*122fs  
ATGAAGACTTTTTAGAGTATCATGACGTTTCGTGTTGTTTTAGATTTCATC  
t  
AAACGAACAAACTAAAATGTCTGATAATGGACCCCAAAATCAGCGAAATGC
