# Supplementary material for: Deletions across the SARS-CoV-2 Genome: Molecular Mechanisms and Putative Functional Consequences of Deletions in Accessory Genes
Source: MDPI journal article supplement (doi:10.3390/microorganisms11010229), 2023-01-16
Supplement: s1 [file s1]

Supplementary Figure S1. Contexts of short deletions in SARS-CoV-2.  
The 1st number is the position and the 5th number is the number of instances  
followed by gene names.

28274 1 159 2594 405321 N-M1fs  
TATCATGACGTTTCGTGTTGTTTTAGATTTTCATCTAAACGAACAAACTAAA  
a  
TGTCTGATAATGGACCCCCAAAATCAGCGAAATGCACCCCGCATTACGTTTG

21994 3 470 1964 331338 S-Y145del  
ATTAAAGTCTGTGAATTTCAATTTTGTAAATGATCCATTTTTGGGTGTTTA  
tta  
CCACAAAAACAACAAAAGTTGGATGGAAAGTGAGTTCAGAGTTTATTCTAG

21766 6 401 1382 327847 S-HV69del  
CAGGACTTGTTCTTACCTTTCTTTTCCAATGTTACTTGGTTCCATGCTAT  
aca tgt  
CTCTGGGACCAATGGTACTAAGAGGTTTGATAACCCTGTCCTACCATTAA

28248 6 25 83 52612 ORF8-DF119del  
GTTTCGTTCTATGAAGACTTTTTAGAGTATCATGACGTTTCGTGTTGTTTTA  
gat ttc  
ATCTAAACGAACAAACTAAAATGTCTGATAATGGACCCCCAAAATCAGCGAA

22029 6 14 70 53385 S-EFR156G  
ATTTTTGGGTGTTTATTACCACAAAAACAACAAAAGTTGGATGGAAAGTG  
agt tca  
GAGTTTATTCTAGTGCGAATAATTGCACTTTTGAATATGTCTCTCAGCCTT

515 3 979 61 2533 ORF1a-V84del  
CCTATGTGTTTCATCAAACGTTTCGGATGCTCGAACTGCACCTCATGGTCAT  
gtt  
ATGGTTGAGCTGGTAGCAGAACTCGAAGGCATTCAGTACGGTCGTAGTGGT

517 3 1265 59 1862 ORF1a-M85del  
TATGTGTTTCATCAAACGTTTCGGATGCTCGAACTGCACCTCATGGTCATGT  
tat  
GGTTGAGCTGGTAGCAGAACTCGAAGGCATTCAGTACGGTCGTAGTGGTGA

29769 1 282 28 565  
CACCACATTTTCACCGAGGCCACGCGGAGTACGATCGAGTGTACAGTGAA  
c  
AATGCTAGGGAGAGCTGCCTATATGGAAGAGCCCTAATGTGTAAAATTAAT

28254 1 534 23 3208 ORF8-I121fs  
TCTATGAAGACTTTTTAGAGTATCATGACGTTTCGTGTTGTTTTAGATTTC  
a  
TCTAAACGAACAAACTAAAATGTCTGATAATGGACCCCCAAAATCAGCGAAA

1606 3 17 7 344 ORF1a-D448del  
ATAGGTTGTAACCATACAGGTGTTGTTGGAGAAGGTTCCGAAGGTCTTAA  
tga

CAACCTTCTTGAAATACTCCAAAAAGAGAAAGTCAACATCAATATTGTTGG

29729 1 71 7 278  
CTTTAATCAGTGTGTAACATTAGGGAGGACTTGAAAGAGCCACCACATT  
t  
CACCGAGGCCACGCGGAGTACGATCGAGTGTACAGTGAACAATGCTAGGGA

21764 1 81 5 1723 S-I68fs  
CTCAGGACTTGTTCTTACCTTTCTTTTCCAATGTTACTTGGTTCCATGCT  
a  
TACATGTCTCTGGGACCAATGGTACTAAGAGGTTTGATAACCCTGTCCTAC

21762 1 77 5 1709 S-A67fs  
AACTCAGGACTTGTTCTTACCTTTCTTTTCCAATGTTACTTGGTTCCATG  
c  
TATACATGTCTCTGGGACCAATGGTACTAAGAGGTTTGATAACCCTGTCCT

29711 1 18 5 1442  
TTAATCTCACATAGCAATCTTTAATCAGTGTGTAACATTAGGGAGGACTT  
g  
AAAGAGCCACCACATTTTCACCGAGGCCACGCGGAGTACGATCGAGTGTAC

27205 3 3 5 1091 ORF6-F2del  
CAGTAGCAGTGACAATATTGCTTTGCTTGTACAGTAAGTGACAACAGATG  
ttt  
CATCTCGTTGACTTTCAGGTTACTATAGCAGAGATATTACTAATTATTATG

518 3 255 5 415 ORF1a-M85del  
ATGTGTTTCATCAAACGTTTCGGATGCTCGAACTGCACCTCATGGTCATGTT  
atg  
GTTGAGCTGGTAGCAGAACTCGAAGGCATTTCAGTACGGTCGTAGTGGTGAG

28273 2 5 5 319 N-M1fs  
GTATCATGACGTTTCGTGTTGTTTTAGATTTTCATCTAAACGAACAACTAA  
aa  
TGTCTGATAATGGACCCCAAATCAGCGAAATGCACCCCGCATTACGTTTG

28032 2 4 5 79 ORF8-I47fs  
CATATGTAGTTGATGACCCGTGTCCTATTCACCTTCTATTCTAAATGGTAT  
at  
TAGAGTAGGAGCTAGAAAATCAGCACCTTTAATTGAATTGTGCGTGATGA

21767 4 84 4 1808 S-HV69fs  
AGGACTTGTTCTTACCTTTCTTTTCCAATGTTACTTGGTTCCATGCTATA  
cat g  
TCTCTGGGACCAATGGTACTAAGAGGTTTGATAACCCTGTCCTACCATTTA

28278 3 7 4 1080 N-SD2Y  
ATGACGTTTCGTGTTGTTTTAGATTTTCATCTAAACGAACAACTAAAATGT  
ctg  
ATAATGGACCCCAAATCAGCGAAATGCACCCCGCATTACGTTTGGTGGAC

26158 4 83 4 394 ORF3a-VN256fs  
AGCCTGAAGAACATGTCCAAATTCACACAATCGACGGTTCATCCGGAGTT

gtt a  
ATCCAGTAATGGAACCAATTTATGATGAACCGACGACGACTACTAGCGTGC

27795 2 63 4 311 ORF7b-L14fs  
AGAAAGACAGAATGATTGAACTTTCATTAATTGACTTCTATTTGTGCTTT  
tt  
AGCCTTTCTGCTATTCCTTGTTTTAATTATGCTTATTATCTTTTGGTTCTC

22191 3 16 3 269 S-I210del  
GTTTAAGAATATTGATGGTTATTTTAAAATATATTCTAAGCACACGCCTA  
tta  
ATTTAGTGCGTGATCTCCCTCAGGGTTTTTCGGCTTTAGAACCATTGGTAG

22289 6 86 3 137 S-AL243del  
TGGTAGATTTGCCAATAGGTATTAACATCACTAGGTTTCAAACTTTACTT  
gct tta  
CATAGAAGTTATTTGACTCCTGGTGATTCTTCTTCAGGTTGGACAGCTGGT

21563 1 24 3 114 S-M1fs  
CAACAGAGTTGTTATTTCTAGTGATGTTCTTGTTAACAACAACTAAACGAACA  
a  
TGTTTGTTTTTCTTGTTTTATTGCCACTAGTCTCTAGTCAGTGTGTTAATC

22295 2 6 3 51 S-H245fs  
ATTTGCCAATAGGTATTAACATCACTAGGTTTCAAACTTTACTTGCTTTA  
ca  
TAGAAGTTATTTGACTCCTGGTGATTCTTCTTCAGGTTGGACAGCTGGTGC

29771 6 5 3 50  
CCACATTTTCACCGAGGCCACGCGGAGTACGATCGAGTGTACAGTGAACA  
atg cta  
GGGAGAGCTGCCTATATGGAAGAGCCCTAATGTGTAAAATTAATTTTAGTA

518 6 307 2 464 ORF1a-MV85del  
ATGTGTTTCATCAAACGTTTCGGATGCTCGAACTGCACCTCATGGTCATGTT  
atg gtt  
GAGCTGGTAGCAGAACTCGAAGGCATTCAGTACGGTCGTAGTGGTGAGACA

21766 3 100 2 461 S-H69del  
CAGGACTTGTTCTTACCTTTCTTTTCCAATGTTACTTGGTTCCATGCTAT  
aca  
TGTCTCTGGGACCAATGGTACTAAGAGGTTTGATAACCCTGTCCTACCATT

21770 3 90 2 445 S-V70del  
ACTTGTTCTTACCTTTCTTTTCCAATGTTACTTGGTTCCATGCTATACAT  
gtc  
TCTGGGACCAATGGTACTAAGAGGTTTGATAACCCTGTCCTACCATTTAAT

27745 1 3 2 296 ORF7a-R118fs  
TTCTTATTGTTGCGGCAATAGTGTTTATAAACTTTGCTTCACACTCAAA  
a  
GAAAGACAGAATGATTGAACTTTCATTAATTGACTTCTATTTGTGCTTTTT

27795 3 34 2 114 ORF7b-L14del

AGAAAGACAGAATGATTGAACTTTCATTAATTGACTTCTATTTGTGCTTT  
tta  
GCCTTTCTGCTATTCCTTGTTTTAATTATGCTTATTATCTTTTGGTTCTCA

28066 4 7 2 53 ORF8-IE58fs  
CTATTCTAAATGGTATATTAGAGTAGGAGCTAGAAAATCAGCACCTTTAA  
ttg a  
ATTGTGCGTGGATGAGGCTGGTTCTAAATCACCCATTCAGTACATCGATAT

29760 1 14 2 41  
TGAAAGAGCCACCACATTTTCACCGAGGCCACGCGGAGTACGATCGAGTG  
t  
ACAGTGAACAATGCTAGGGAGAGCTGCCTATATGGAAGAGCCCTAATGTGT

29758 1 7 2 28  
CTTGAAAGAGCCACCACATTTTCACCGAGGCCACGCGGAGTACGATCGAG  
t  
GTACAGTGAACAATGCTAGGGAGAGCTGCCTATATGGAAGAGCCCTAATGT

28090 6 150 1 864 ORF8-GSK66E  
AGGAGCTAGAAAATCAGCACCTTTAATTGAATTGTGCGTGGATGAGGCTG  
gtt cta  
AATCACCCATTCAGTACATCGATATCGGTAATTATACAGTTTCCTGTTTAC

21993 2 71 1 567 S-Y144fs  
TATTAAAGTCTGTGAATTTCAATTTTGTAATGATCCATTTTGGGTGTTT  
at  
TACCACAAAAACAACAAAAGTTGGATGGAAAGTGAGTTCAGAGTTTATTCT

21989 1 46 1 476 S-V143fs  
TTGTTATTAAAGTCTGTGAATTTCAATTTTGTAATGATCCATTTTGGGT  
g  
TTTATTACCACAAAAACAACAAAAGTTGGATGGAAAGTGAGTTCAGAGTTT

21763 4 21 1 378 S-AI67fs  
ACTCAGGACTTGTTCTTACCTTTCTTTTCCAATGTTACTTGGTTCCATGC  
tat a  
CATGTCTCTGGGACCAATGGTACTAAGAGGTTTGATAACCCTGTCCTACCA

27579 3 131 1 364 ORF7a-QF62H  
TTTCATCCTCTAGCTGATAACAAATTTGCACTGACTTGCTTTAGCACTCA  
att  
TGCTTTTGCTTGTCCTGACGGCGTAAAACACGTCTATCAGTTACGTGCCAG

28896 3 23 1 358 N-AR208G  
CAACAGTTCAAGAAATTCAACTCCAGGCAGCAGTAGGGGAACCTTCTCCTG  
cta  
GAATGGCTGGCAATGGCGGTGATGCTGCTCTTGCTTTGCTGCTGCTTGACA

28065 3 61 1 210 ORF8-I58del  
TCTATTCTAAATGGTATATTAGAGTAGGAGCTAGAAAATCAGCACCTTTA  
att  
GAATTGTGCGTGGATGAGGCTGGTTCTAAATCACCCATTCAGTACATCGAT

21998 3 78 1 193 S-H146del  
AAGTCTGTGAATTTCAATTTTGTAAATGATCCATTTTGGGTGTTTATTAC  
cac  
AAAAACAACAAAAGTTGGATGGAAAGTGAGTTCAGAGTTTATTCTAGTGCG

26159 3 68 1 186 ORF3a-VN256D  
GCCTGAAGAACATGTCCAAATTCACACAATCGACGGTTCATCCGGAGTTG  
tta  
ATCCAGTAATGGAACCAATTTATGATGAACCGACGACGACTACTAGCGTGC

3952 3 12 1 156 ORF1a-DK1229E  
CCATTTATAACTGAAAGTAAACCTTCAGTTGAACAGAGAAAACAAGATGA  
taa  
GAAAATCAAAGCTTGTGTTGAAGAAGTTACAACAACCTCTGGAAGAACTAA

28097 1 33 1 140 ORF8-K68fs  
AGAAAATCAGCACCTTTAATTGAATTGTGCGTGGATGAGGCTGGTTCTAA  
a  
TCACCCATTCAGTACATCGATATCGGTAATTATACAGTTTCCTGTTTACCT

27700 3 24 1 123 ORF7a-I103del  
TGTTTCATCAGACAAGAGGAAGTTCAAGAAGTTTACTCTCCAATTTTCTT  
att  
GTTGCGGCAATAGTGTTTATAACACTTTGCTTCACACTCAAAAGAAAGACA

29728 2 41 1 118  
TCTTTAATCAGTGTGTAACATTAGGGAGGACTTGAAAGAGCCACCACATT  
tt  
CACCGAGGCCACGCGGAGTACGATCGAGTGTACAGTGAACAATGCTAGGGA

29775 1 75 1 92  
ATTTTCACCGAGGCCACGCGGAGTACGATCGAGTGTACAGTGAACAATGC  
t  
AGGGAGAGCTGCCTATATGGAAGAGCCCTAATGTGTAAAATTAATTTTAGT

26162 1 27 1 92 ORF3a-N257fs  
TGAAGAACATGTCCAAATTCACACAATCGACGGTTCATCCGGAGTTGTTA  
a  
TCCAGTAATGGAACCAATTTATGATGAACCGACGACGACTACTAGCGTGCC

28997 3 16 1 91 N-Q242del  
ACAGATTGAACCAGCTTGAGAGCAAAATGTCTGGTAAAGGCCAACAACAA  
caa  
GGCCAAACTGTCACTAAGAAATCTGCTGCTGAGGCTTCTAAGAAGCCTCGG

9860 3 20 1 90 ORF1a-L3199del  
CCTTTTGTAAATAAAGAAATGTATCTAAAGTTGCGTAGTGATGTGCTA  
tta  
CCTCTTACGCAATATAATAGATACTTAGCTCTTTATAATAAGTACAAGTAT

22194 3 8 1 87 S-NL211I  
TAAGAATATTGATGGTTATTTTAAATATATTCTAAGCACACGCCTATTA  
att  
TAGTGCGTGATCTCCCTCAGGGTTTTTCGGCTTTAGAACCATTGGTAGATT

29769 2 67 1 82  
CACCACATTTTCACCGAGGCCACGCGGAGTACGATCGAGTGTACAGTGAA  
ca  
ATGCTAGGGAGAGCTGCCTATATGGAAGAGCCCTAATGTGTAAAATTAATT

28090 3 6 1 56 ORF8-GS66A  
AGGAGCTAGAAAATCAGCACCTTTAATTGAATTGTGCGTGGATGAGGCTG  
gtt  
CTAAATCACCCATTCAGTACATCGATATCGGTAATTATACAGTTTCCTGTT

29682 1 12 1 55  
CTACATAGCACAAAGTAGATGTAGTTAACTTTAATCTCACATAGCAATCTT  
t  
AATCAGTGTGTAACATTAGGGAGGACTTGAAAGAGCCACCACATTTTCACC

28248 4 11 1 52 ORF8-DF119fs  
GTTTCGTTCTATGAAGACTTTTATAGAGTATCATGACGTTTCGTGTTGTTT  
gat t  
TCATCTAAACGAACAACTAAAATGTCTGATAATGGACCCCAAAATCAGCG

21762 2 7 1 30 S-A67fs  
AACTCAGGACTTGTTCTTACCTTTCTTTTCCAATGTTACTTGGTTCCATG  
ct  
ATACATGTCTCTGGGACCAATGGTACTAAGAGGTTTGATAACCCTGTCCTA

28093 3 16 1 28 ORF8-SK67\*  
AGCTAGAAAATCAGCACCTTTAATTGAATTGTGCGTGGATGAGGCTGGTT  
cta  
AATCACCCATTCAGTACATCGATATCGGTAATTATACAGTTTCCTGTTTAC

29754 1 13 1 26  
AGGACTTGAAAGAGCCACCACATTTTCACCGAGGCCACGCGGAGTACGAT  
c  
GAGTGTACAGTGAACAATGCTAGGGAGAGCTGCCTATATGGAAGAGCCCTA

29749 6 7 1 24  
TAGGGAGGACTTGAAAGAGCCACCACATTTTCACCGAGGCCACGCGGAGT  
acg atc  
GAGTGTACAGTGAACAATGCTAGGGAGAGCTGCCTATATGGAAGAGCCCTA

29750 3 13 1 23  
AGGGAGGACTTGAAAGAGCCACCACATTTTCACCGAGGCCACGCGGAGTA  
cga  
TCGAGTGTACAGTGAACAATGCTAGGGAGAGCTGCCTATATGGAAGAGCCC

29770 3 2 1 17  
ACCACATTTTCACCGAGGCCACGCGGAGTACGATCGAGTGTACAGTGAAC  
aat  
GCTAGGGAGAGCTGCCTATATGGAAGAGCCCTAATGTGTAAAATTAATTTT

29754 5 3 1 11  
AGGACTTGAAAGAGCCACCACATTTTCACCGAGGCCACGCGGAGTACGAT  
cga gt

GTACAGTGAACAATGCTAGGGAGAGCTGCCTATATGGAAGAGCCCTAATGT

29732 2 1 1 10  
TAATCAGTGTGTAACATTAGGGAGGACTTGAAAGAGCCACCACATTTTCA  
cc  
GAGGCCACGCGGAGTACGATCGAGTGTACAGTGAACAATGCTAGGGAGAGC

223 1 4 1 9  
CGTCTATCTTCTGCAGGCTGCTTACGGTTTCGTCCGTGTTGCAGCCGATC  
a  
TCAGCACATCTAGGTTTCGTCCGGGTGTGACCGAAAGGTAAGATGGAGAGC

29751 3 2 1 8  
GGGAGGACTTGAAAGAGCCACCACATTTTCACCGAGGCCACGCGGAGTAC  
gat  
CGAGTGTACAGTGAACAATGCTAGGGAGAGCTGCCTATATGGAAGAGCCCT

28092 3 1 1 8 ORF8-S67del  
GAGCTAGAAAATCAGCACCTTTAATTGAATTGTGCGTGATGAGGCTGGT  
tct  
AAATCACCCATTTCAGTACATCGATATCGGTAATTATACAGTTTCCTGTTTA

29750 6 3 1 6  
AGGGAGGACTTGAAAGAGCCACCACATTTTCACCGAGGCCACGCGGAGTA  
cga tcg  
AGTGTACAGTGAACAATGCTAGGGAGAGCTGCCTATATGGAAGAGCCCTAA

21995 3 80 0 921 S-Y145del  
TTAAAGTCTGTGAATTTCAATTTTGTAAATGATCCATTTTGGGTGTTTAT  
tac  
CACAAAAACAACAAAAGTTGGATGGAAAGTGAGTTCAGAGTTTATTCTAGT

21766 1 45 0 771 S-I68fs  
CAGGACTTGTTCTTACCTTTCTTTTCCAATGTTACTTGGTTCCATGCTAT  
a  
CATGTCTCTGGGACCAATGGTACTAAGAGGTTTGATAACCCTGTCCTACCA

21768 1 23 0 672 S-H69fs  
GGACTTGTTCTTACCTTTCTTTTCCAATGTTACTTGGTTCCATGCTATAC  
a  
TGTCTCTGGGACCAATGGTACTAAGAGGTTTGATAACCCTGTCCTACCATT

21770 1 23 0 672 S-V70fs  
ACTTGTTCTTACCTTTCTTTTCCAATGTTACTTGGTTCCATGCTATACAT  
g  
TCTCTGGGACCAATGGTACTAAGAGGTTTGATAACCCTGTCCTACCATTTA

21772 3 23 0 671 S-S71del  
TTGTTCTTACCTTTCTTTTCCAATGTTACTTGGTTCCATGCTATACATGT  
ctc  
TGGGACCAATGGTACTAAGAGGTTTGATAACCCTGTCCTACCATTTAATGA

26158 3 138 0 324 ORF3a-V256del  
AGCCTGAAGAACATGTCCAAATTCACACAATCGACGGTTCATCCGGAGTT

gtt  
AATCCAGTAATGGAACCAATTTATGATGAACCGACGACGACTACTAGCGTG

21770 2 30 0 321 S-V70fs  
ACTTGTCTTACCTTTCTTTTCCAATGTTACTTGGTTCATGCTATACAT

gt  
CTCTGGGACCAATGGTACTAAGAGGTTTGATAACCCTGTCCTACCATTAA

21767 6 80 0 214 S-HV69del  
AGGACTTGTTCTTACCTTTCTTTTCCAATGTTACTTGGTTCATGCTATA

cat gtc  
TCTGGGACCAATGGTACTAAGAGGTTTGATAACCCTGTCCTACCATTAAAT

29728 3 10 0 211  
TCTTTAATCAGTGTGTAACATTAGGGAGGACTTGAAAGAGCCACCACATT

ttc  
ACCGAGGCCACGCGGAGTACGATCGAGTGTACAGTGAACAATGCTAGGGAG

28150 3 2 0 206 ORF8-FT86S  
ACCCATTCAGTACATCGATATCGGTAATTATACAGTTTCCTGTTTACCTT

tta  
CAATTAATTGCCAGGAACCTAAATTGGGTAGTCTTGTAGTGCGTTGTTTCGT

27794 3 56 0 201 ORF7b-F13del  
AAGAAAGACAGAATGATTGAACTTTCATTAATTGACTTCTATTTGTGCTT

ttt  
AGCCTTTCTGCTATTCCTTGTTTTAATTATGCTTATTATCTTTTGGTTCTC

28914 6 17 0 178 N-GG214del  
AACTCCAGGCAGCAGTAGGGGAACCTTCTCCTGCTAGAATGGCTGGCAATG

gcg gtc  
ATGCTGCTCTTGCTTTGCTGCTGCTTGACAGATTGAACCAGCTTGAGAGCA

28094 3 2 0 122 ORF8-K68del  
GCTAGAAAATCAGCACCTTTAATTGAATTGTGCGTGGATGAGGCTGGTTC

taa  
ATCACCCATTCAGTACATCGATATCGGTAATTATACAGTTTCCTGTTTACC

28240 2 4 0 115 ORF8-V116fs  
AGTGCGTTGTTTCGTTCTATGAAGACTTTTTAGAGTATCATGACGTTTCGTG

tt  
GTTTTAGATTTTCATCTAAACGAACAACTAAAATGTCTGATAATGGACCCC

27697 6 31 0 109 ORF7a-LI102del  
AACTGTTCATCAGACAAGAGGAAGTTCAAGAACTTTACTCTCCAATTTTT

ctt att  
GTTGCGGCAATAGTGTTTATAACACTTTGCTTCACACTCAAAAGAAAGACA

28247 1 5 0 104 ORF8-L118fs  
TGTTTCGTTCTATGAAGACTTTTTAGAGTATCATGACGTTTCGTGTTGTTTT

a  
GATTTTCATCTAAACGAACAACTAAAATGTCTGATAATGGACCCCAAAATC

28249 2 4 0 100 ORF8-D119fs



TTCGTTCTATGAAGACTTTTTAGAGTATCATGACGTTTCGTGTTGTTTTAG  
at  
TTCATCTAAACGAACAACTAAAATGTCTGATAATGGACCCCAAATCAGC

28028 3 18 0 95 ORF8-WY45C  
CAACCATATGTAGTTGATGACCCGTGTCCTATTCACCTTCTATTCTAAATG  
gta  
TATTAGAGTAGGAGCTAGAAAATCAGCACCTTTAATTGAATTGTGCGTGGA

26159 2 7 0 94 ORF3a-V256fs  
GCCTGAAGAACATGTCCAAATTCACACAATCGACGGTTCATCCGGAGTTG  
tt  
AATCCAGTAATGGAACCAATTTATGATGAACCGACGACGACTACTAGCGTG

204 3 5 0 90  
TGACAGGACACGAGTAACTCGTCTATCTTCTGCAGGCTGCTTACGGTTTC  
gtc  
CGTGTTGCAGCCGATCATCAGCACATCTAGGTTTCGTCCGGGTGTGACCGA

6513 3 26 0 89 ORF1a-SL2083I  
GAAAACTACCGAAGTTGTAGGAGACATTATACTTAAACCAGCAAATAATA  
gtt  
TAAAAATTACAGAAGAGGTTGGCCACACAGATCTAATGGCTGCTTATGTAG

519 6 72 0 84 ORF1a-MVE85K  
TGTGTTTCATCAAACGTTTCGGATGCTCGAACTGCACCTCATGGTCATGTTA  
tgg ttg  
AGCTGGTAGCAGAACTCGAAGGCATTCAGTACGGTCGTAGTGGTGAGACAC

27897 5 2 0 83 ORF8-KF2fs  
CACTTGAAGTCAAGATCATAATGAACTTGTCACGCCTAAACGAACATG  
aaa tt  
TCTTGTTTTCTTAGGAATCATCACAACCTGTAGCTGCATTTACCAAGAATG

27722 2 25 0 81 ORF7a-I110fs  
TCAAGAACTTTACTCTCCAATTTTTCTTATTGTTGCGGCAATAGTGTTTA  
ta  
ACACTTTGCTTCACACTCAAAAGAAAGACAGAATGATTGAACTTTCATTAA

222 1 44 0 78  
TCGTCTATCTTCTGCAGGCTGCTTACGGTTTCGTCCGTGTTGCAGCCGAT  
c  
ATCAGCACATCTAGGTTTCGTCCGGGTGTGACCGAAAGGTAAGATGGAGAG

21982 3 43 0 76 S-F140del  
ACTAATGTTGTTATTAAAGTCTGTGAATTTCAATTTTGTAATGATCCATT  
ttt  
GGGTGTTTATTACCACAAAAACAACAAAAGTTGGATGGAAAGTGAGTTCAG

522 3 65 0 74 ORF1a-V86del  
GTTTCATCAAACGTTTCGGATGCTCGAACTGCACCTCATGGTCATGTTATGG  
ttg  
AGCTGGTAGCAGAACTCGAAGGCATTCAGTACGGTCGTAGTGGTGAGACAC

21990 3 36 0 74 S-VY143D  
TGTATTAAAGTCTGTGAATTTCAATTTTGTAATGATCCATTTTTGGGTG  
ttt  
ATTACCACAAAAACAACAAAAGTTGGATGGAAAGTGAGTTCAGAGTTTATT

25431 6 16 0 73 ORF3a-TL14del  
ATAAACGAACTTATGGATTTGTTTATGAGAATCTTCACAATTGGAAGTGT  
aac ttt  
GAAGCAAGGTGAAATCAAGGATGCTACTCCTTCAGATTTTGTTTCGCGCTAC

29773 2 5 0 73  
ACATTTTCACCGAGGCCACGCGGAGTACGATCGAGTGTACAGTGAACAAT  
gc  
TAGGGAGAGCTGCCTATATGGAAGAGCCCTAATGTGTAAAATTAATTTTAG

27622 3 4 0 73 ORF7a-L77del  
GCACTCAATTTGCTTTTGCTTGTCTGACGGCGTAAACACGTCTATCAG  
tta  
CGTGCCAGATCAGTTTCACCTAAACTGTTTCATCAGACAAGAGGAAGTTCAA

26485 2 8 0 72  
ATCTGAATTCTTCTAGAGTTCCTGATCTTCTGGTCTAAACGAACTAAATA  
tt  
ATATTAGTTTTTCTGTTTGGAACCTTAATTTTAGCCATGGCAGATTCCAAC

3546 3 57 0 71 ORF1a-NG1094R  
GGCTACTAACAAATGCCATGCAAGTTGAATCTGATGATTACATAGCTACTA  
atg  
GACCACTTAAAGTGGGTGGTAGTTGTGTTTTAAGCGGACACAATCTTGCTA

27694 6 30 0 70 ORF7a-FL101del  
CTAAACTGTTTCATCAGACAAGAGGAAGTTCAAGAACTTTACTCTCCAATT  
ttt ctt  
ATTGTTGCGGCAATAGTGTTTATAACACTTTGCTTCACACTCAAAAGAAAG

510 6 46 0 68 ORF1a-GH82del  
ACAGCCCTATGTGTTTCATCAAACGTTTCGGATGCTCGAACTGCACCTCATG  
gtc atg  
TTATGGTTGAGCTGGTAGCAGAACTCGAAGGCATTTCAGTACGGTCGTAGTG

27388 1 18 0 65  
AGAATAAATATTCTCAATTAGATGAAGAGCAACCAATGGAGATTGATTAA  
a  
CGAACATGAAAATTATTCTTTTCTTGGCACTGATAACACTCGCTACTTGTG

21982 4 1 0 64 S-FL140fs  
ACTAATGTTGTTATTAAAGTCTGTGAATTTCAATTTTGTAATGATCCATT  
ttt g  
GGTGTATTATTACCACAAAAACAACAAAAGTTGGATGGAAAGTGAGTTCAGA

26498 1 47 0 63  
TAGAGTTCCTGATCTTCTGGTCTAAACGAACTAAATATTATATTAGTTTT  
t  
CTGTTTGGAACCTTAATTTTAGCCATGGCAGATTCCAACGGTACTATTACC

1606 6 2 0 62 ORF1a-DN448del  
ATAGGTTGTAACCATACAGGTGTTGTTGGAGAAGGTTCCGAAGGTCTTAA  
tga caa  
CCTTCTTGAAATACTCCAAAAAGAGAAAGTCAACATCAATATTGTTGGTGA

27562 3 1 0 59 ORF7a-T57del  
ACGAGGGCAATTCACCATTTTCATCCTCTAGCTGATAACAAATTTGCACTG  
act  
TGCTTTAGCACTCAATTTGCTTTTGCTTGTCTGACGGCGTAAAACACGTC

27568 5 1 0 59 ORF7a-FS59fs  
GCAATTCACCATTTTCATCCTCTAGCTGATAACAAATTTGCACTGACTTGC  
ttt ag  
CACTCAATTTGCTTTTGCTTGTCTGACGGCGTAAAACACGTCTATCAGTT

28976 3 23 0 58 N-S235del  
CTCTTGCTTTGCTGCTGCTTGACAGATTGAACCAGCTTGAGAGCAAAATG  
tct  
GGTAAAGGCCAACAACAACAAGGCCAAACTGTCACTAAGAAATCTGCTGCT

11283 3 16 0 57 ORF1a-SL3673M  
TGCTAGTTGGGTGATGCGTATTATGACATGGTTGGATATGGTTGATACTA  
gtt  
TGTCTGGTTTTAAGCTAAAAGACTGTGTTATGTATGCATCAGCTGTAGTGT

27560 1 1 0 57 ORF7a-L56fs  
ATACGAGGGCAATTCACCATTTTCATCCTCTAGCTGATAACAAATTTGCAC  
t  
GACTTGCTTTAGCACTCAATTTGCTTTTGCTTGTCTGACGGCGTAAAACA

28242 3 29 0 56 ORF8-V117del  
TGCGTTGTTTCGTTCTATGAAGACTTTTTAGAGTATCATGACGTTTCGTGTT  
gtt  
TTAGATTTTCATCTAAACGAACAACTAAAATGTCTGATAATGGACCCCAAA

3333 3 10 0 55 ORF1a-IE1023K  
TGAGGTTCAACCTCAATTAGAGATGGAACCTACACCAGTTGTTTCAGACTA  
ttg  
AAGTGAATAGTTTTAGTGGTTATTTAAAACTTACTGACAATGTATACATTA

28219 2 8 0 55 ORF8-L109fs  
ACCTAAATTGGGTAGTCTTGTAGTGCGTTGTTTCGTTCTATGAAGACTTTT  
ta  
GAGTATCATGACGTTTCGTGTTGTTTTAGATTTTCATCTAAACGAACAACTA

27624 1 6 0 55 ORF7a-L77fs  
ACTCAATTTGCTTTTGCTTGTCTGACGGCGTAAAACACGTCTATCAGTT  
a  
CGTGCCAGATCAGTTTCACCTAAACTGTTTCATCAGACAAGAGGAAGTTCAA

27556 2 1 0 55 ORF7a-A55fs  
GAACATACGAGGGCAATTCACCATTTTCATCCTCTAGCTGATAACAAATTT  
gc

ACTGACTTGCTTTAGCACTCAATTTGCTTTTGCTTGTCTGACGGCGTAAA

29750 5 20 0 52  
AGGGAGGACTTGAAAGAGCCACCACATTTTCACCGAGGCCACGCGGAGTA  
cga tc  
GAGTGTACAGTGAACAATGCTAGGGAGAGCTGCCTATATGGAAGAGCCCTA

27884 1 9 0 51 ORF7b-A43fs  
ATCTTTTGGTTCTCACTTGAAGTCAAGATCATAATGAACTTGTACACGC  
c  
TAAACGAACATGAAATTTCTTGTTTTCTTAGGAATCATCACAAGTGTAGCT

29741 1 14 0 49  
TGTAACATTAGGGAGGACTTGAAAGAGCCACCACATTTTCACCGAGGCCA  
c  
GCGGAGTACGATCGAGTGTACAGTGAACAATGCTAGGGAGAGCTGCCTATA

3335 6 10 0 49 ORF1a-EV1024del  
AGGTTCAACCTCAATTAGAGATGGAAGTACACCAGTTGTTTCAGACTATT  
gaa gtg  
AATAGTTTtagTGGTTATTTAAAGTACTGACAATGTATACATTAAGAAAT

27796 1 18 0 48 ORF7b-L14fs  
GAAAGACAGAATGATTGAAGTTTCATTAATTGACTTCTATTTGTGCTTTT  
t  
AGCCTTTCTGCTATTCCTTGTTTTAATTATGCTTATTATCTTTTGGTTCTC

21994 6 18 0 48 S-YH145del  
ATTAAAGTCTGTGAATTTCAATTTTGTAAATGATCCATTTTGGGTGTTTA  
tta cca  
CAAAAACAACAAAAGTTGGATGGAAAGTGAGTTCAGAGTTTATTCTAGTGC

6510 3 16 0 48 ORF1a-N2082del  
TGTGAAAGTACCGAAGTTGTAGGAGACATTATACTTAAACCAGCAAATA  
ata  
GTTTAAAAATTACAGAAGAGGTTGGCCACACAGATCTAATGGCTGCTTATG

29762 6 7 0 48  
AAAGAGCCACCACATTTTCACCGAGGCCACGCGGAGTACGATCGAGTGTA  
cag tga  
ACAATGCTAGGGAGAGCTGCCTATATGGAAGAGCCCTAATGTGTAAAATTA

426 3 33 0 47 ORF1a-V54del  
GGTCTTATCAGAGGCACGTCAACATCTTAAAGATGGCACTTGTGGCTTAG  
tag  
AAGTTGAAAAAGGCGTTTTGCCTCAACTTGAACAGCCCTATGTGTTTCATCA

27683 3 23 0 47 ORF7a-Y97del  
ATCAGTTTCACCTAAAGTTCATCAGACAAGAGGAAGTTCAAGAACTTT  
act  
CTCCAATTTTCTTATTGTTGCGGCAATAGTGTTTATAACACTTTGCTTCA

28242 4 20 0 47 ORF8-VL117fs  
TGCGTTGTTCTGTTCTATGAAGACTTTTtagAGTATCATGACGTTTCGTGTT

gtt t  
TAGATTTTCATCTAAACGAACAAACTAAAATGTCTGATAATGGACCCCAAAA

25516 6 2 0 46 ORF3a-PF42del  
CTTCAGATTTTGTTCGCGCTACTGCAACGATACCGATACAAGCCTCACTC  
cct ttc  
GGATGGCTTATTGTTGGCGTTGCACTTCTTGCTGTTTTTCAGAGCGCTTCC

25718 6 1 0 46 ORF3a-YA109del  
ACACCTTTTGCTCGTTGCTGCTGGCCTTGAAGCCCCTTTTCTCTATCTTT  
atg ctt  
TAGTCTACTTCTTGCAGAGTATAAACTTTGTAAGAATAATAATGAGGCTTT

21765 3 43 0 45 S-IH68N  
TCAGGACTTGTTCTTACCTTTCTTTTCCAATGTTACTTGGTTCCATGCTA  
tac  
ATGTCTCTGGGACCAATGGTACTAAGAGGTTTGATAACCCTGTCCTACCAT

669 3 29 0 45 ORF1a-SY135N  
CCGCAAGGTTCTTCTTCGTAAGAACGGTAATAAAGGAGCTGGTGGCCATA  
gtt  
ACGGCGCCGATCTAAAGTCATTTGACTTAGGCGACGAGCTTGGCACTGATC

21990 6 26 0 45 S-VYY143D  
TGTTATTAAAGTCTGTGAATTTCAATTTTGTAATGATCCATTTTTGGGTG  
ttt att  
ACCACAAAAACAACAAAAGTTGGATGGAAAGTGAGTTCAGAGTTTATTCTA

6813 3 6 0 43 ORF1a-T2183del  
TAATTATATGCCTTATTTCTTTACTTTATTGCTACAATTGTGTACTTTTA  
cta  
GAAGTACAAATTCTAGAATTAAAGCATCTATGCCGACTACTATAGCAAAGA

28254 3 5 0 43 ORF8-I121del  
TCTATGAAGACTTTTATAGAGTATCATGACGTTTCGTGTTGTTTTAGATTTC  
atc  
TAAACGAACAAACTAAAATGTCTGATAATGGACCCCAAAATCAGCGAAATG

28219 1 14 0 40 ORF8-L109fs  
ACCTAAATTGGGTAGTCTTGTAGTGCGTTGTTTCGTTCTATGAAGACTTTT  
t  
AGAGTATCATGACGTTTCGTGTTGTTTTAGATTTTCATCTAAACGAACAAACT

28242 2 3 0 40 ORF8-V117fs  
TGCGTTGTTTCGTTCTATGAAGACTTTTATAGAGTATCATGACGTTTCGTGTT  
gt  
TTTAGATTTTCATCTAAACGAACAAACTAAAATGTCTGATAATGGACCCCAA

25714 6 8 0 39 ORF3a-LY108del  
ACTCACACCTTTTGCTCGTTGCTGCTGGCCTTGAAGCCCCTTTTCTCTAT  
ctt tat  
GCTTTAGTCTACTTCTTGCAGAGTATAAACTTTGTAAGAATAATAATGAGG

241 2 12 0 38

TGCTTACGGTTTCGTCCGTGTTGCAGCCGATCATCAGCACATCTAGGTTT  
cg  
TCCGGGTGTGACCGAAAGGTAAGATGGAGAGCCTTGTCCCTGGTTTCAACG

27383 1 9 0 38 ORF6-D61fs  
AACTGAGAATAAATATTCTCAATTAGATGAAGAGCAACCAATGGAGATTG  
a  
TTAAACGAACATGAAAATTATTCTTTTCTTGGCACTGATAACACTCGCTAC

29749 1 8 0 38  
TAGGGAGGACTTGAAAGAGCCACCACATTTTCACCGAGGCCACGCGGAGT  
a  
CGATCGAGTGTACAGTGAACAATGCTAGGGAGAGCTGCCTATATGGAAGAG

29762 2 8 0 37  
AAAGAGCCACCACATTTTCACCGAGGCCACGCGGAGTACGATCGAGTGTA  
ca  
GTGAACAATGCTAGGGAGAGCTGCCTATATGGAAGAGCCCTAATGTGTAAA

29752 3 8 0 36  
GGAGGACTTGAAAGAGCCACCACATTTTCACCGAGGCCACGCGGAGTACG  
atc  
GAGTGTACAGTGAACAATGCTAGGGAGAGCTGCCTATATGGAAGAGCCCTA

27986 4 5 0 36 ORF8-YV31fs  
GCATTTACCAAGAATGTAGTTTACAGTCATGTACTCAACATCAACCATA  
tgt a  
GTTGATGACCCGTGTCCTATTCACCTTCTATTCTAAATGGTATATTAGAGTA

241 1 27 0 35  
TGCTTACGGTTTCGTCCGTGTTGCAGCCGATCATCAGCACATCTAGGTTT  
c  
GTCCGGGTGTGACCGAAAGGTAAGATGGAGAGCCTTGTCCCTGGTTTCAAC

1598 6 15 0 35 ORF1a-GL445del  
GCGCTAACATAGGTTGTAACCATACAGGTGTTGTTGGAGAAGGTTCCGAA  
ggt ctt  
AATGACAACCTTCTTGAAATACTCCAAAAAGAGAAAGTCAACATCAATATT

21768 3 10 0 34 S-HV69L  
GGACTTGTTCTTACCTTTCTTTTCCAATGTTACTTGGTTCCATGCTATAC  
atg  
TCTCTGGGACCAATGGTACTAAGAGGTTTGATAACCCTGTCCTACCATTTA

21808 3 1 0 34 S-V83del  
CATGCTATACATGTCTCTGGGACCAATGGTACTAAGAGGTTTGATAAACC  
tgt  
CCTACCATTTAATGATGGTGTTTATTTTGCTTCCACTGAGAAGTCTAACAT

29742 6 5 0 33  
GTAACATTAGGGAGGACTTGAAAGAGCCACCACATTTTCACCGAGGCCAC  
gcg gag  
TACGATCGAGTGTACAGTGAACAATGCTAGGGAGAGCTGCCTATATGGAAG

29734 1 3 0 33  
ATCAGTGTGTAACATTAGGGAGGACTTGAAAGAGCCACCACATTTTCACC  
g  
AGGCCACGCGGAGTACGATCGAGTGTACAGTGAACAATGCTAGGGAGAGCT

28242 5 14 0 32 ORF8-VL117fs  
TGCGTTGTTCTGTTCTATGAAGACTTTTTAGAGTATCATGACGTTTCGTGTT  
gtt tt  
AGATTTTCATCTAAACGAACAACTAAAATGTCTGATAATGGACCCCAAAAT

27759 3 11 0 32 ORF7a-\*122fs  
GCAATAGTGTTTATAACACTTTGCTTCACACTCAAAAGAAAGACAGAATG  
att  
GAACTTTCATTAATTGACTTCTATTTGTGCTTTTTAGCCTTTCTGCTATTC

27759 3 11 0 32 ORF7b-I2del  
GCAATAGTGTTTATAACACTTTGCTTCACACTCAAAAGAAAGACAGAATG  
att  
GAACTTTCATTAATTGACTTCTATTTGTGCTTTTTAGCCTTTCTGCTATTC

28994 6 3 0 32 N-QQ241del  
TTGACAGATTGAACCAGCTTGAGAGCAAAATGTCTGGTAAAGGCCAACAA  
caa caa  
GGCCAAACTGTCACTAAGAAATCTGCTGCTGAGGCTTCTAAGAAGCCTCGG

28901 3 2 0 32 N-M210del  
GTTCAAGAAATTCAACTCCAGGCAGCAGTAGGGGAAGTTCTCCTGCTAGA  
atg  
GCTGGCAATGGCGGTGATGCTGCTCTTGCTTTGCTGCTGCTTGACAGATTG

21769 5 2 0 32 S-HV69fs  
GACTTGTTCTTACCTTTCTTTTCCAATGTTACTTGGTTCCATGCTATACA  
tgt ct  
CTGGGACCAATGGTACTAAGAGGTTTGATAACCCTGTCCTACCATTTAATG

29747 3 12 0 31  
ATTAGGGAGGACTTGAAAGAGCCACCACATTTTCACCGAGGCCACGCGGA  
gta  
CGATCGAGTGTACAGTGAACAATGCTAGGGAGAGCTGCCTATATGGAAGAG

27267 1 5 0 31 ORF6-F22fs  
GACTTTCAGGTTACTATAGCAGAGATATTACTAATTATTATGAGGACTTT  
t  
AAAGTTTCCATTTGGAATCTTGATTACATCATAAACCTCATAATTAAAAAT

29759 2 4 0 31  
TTGAAAGAGCCACCACATTTTCACCGAGGCCACGCGGAGTACGATCGAGT  
gt  
ACAGTGAACAATGCTAGGGAGAGCTGCCTATATGGAAGAGCCCTAATGTGT

21774 1 7 0 30 S-S71fs  
GTTCTTACCTTTCTTTTCCAATGTTACTTGGTTCCATGCTATACATGTCT  
c  
TGGGACCAATGGTACTAAGAGGTTTGATAACCCTGTCCTACCATTTAATGA

21778 1 7 0 30 S-G72fs  
TTACCTTTCTTTTCCAATGTTACTTGGTTCCATGCTATACATGTCTCTGG  
g  
ACCAATGGTACTAAGAGGTTTGATAACCCTGTCCTACCATTTAATGATGGT

515 1 5 0 30 ORF1a-V84fs  
CCTATGTGTTTCATCAAACGTTTCGGATGCTCGAACTGCACCTCATGGTCAT  
g  
TTATGGTTGAGCTGGTAGCAGAACTCGAAGGCATTTCAGTACGGTCGTAGTG

27577 1 4 0 30 ORF7a-Q62fs  
CATTTTCATCCTCTAGCTGATAACAAATTTGCACTGACTTGCTTTAGCACT  
c  
AATTTGCTTTTGCTTGTCTGACGGCGTAAAACACGTCTATCAGTTACGTG

27267 2 3 0 30 ORF6-F22fs  
GACTTTCAGGTTACTATAGCAGAGATATTACTAATTATTATGAGGACTTT  
ta  
AAGTTTCCATTTGGAATCTTGATTACATCATAAACCTCATAATTAAAAATT

23480 3 2 0 30 S-S640del  
CTATTCATGCAGATCAACTTACTCCTACTTGGCGTGTTTATTCTACAGGT  
tct  
AATGTTTTTCAAACACGTGCAGGCTGTTTAATAGGGGCTGAACATGTCAAC

21768 4 14 0 29 S-HV69fs  
GGACTTGTTCTTACCTTTCTTTTCCAATGTTACTTGGTTCCATGCTATAC  
atg t  
CTCTGGGACCAATGGTACTAAGAGGTTTGATAACCCTGTCCTACCATTAA

29750 2 12 0 29  
AGGGAGGACTTGAAAGAGCCACCACATTTTCACCGAGGCCACGCGGAGTA  
cg  
ATCGAGTGTACAGTGAACAATGCTAGGGAGAGCTGCCTATATGGAAGAGCC

4881 3 14 0 28 ORF1a-S1539del  
ACTAGGTATAGAATTTCTTAAGAGAGGTGATAAAAGTGTATATTACACTA  
gta  
ATCCTACCACATTCCACCTAGATGGTGAAGTTATCACCTTTGACAATCTTA

199 1 3 0 27  
GTCGTTGACAGGACACGAGTAACTCGTCTATCTTCTGCAGGCTGCTTACG  
g  
TTTCGTCCGTGTTGCAGCCGATCATCAGCACATCTAGGTTTCGTCCGGGTG

29764 4 2 0 27  
AGAGCCACCACATTTTCACCGAGGCCACGCGGAGTACGATCGAGTGTACA  
gtg a  
ACAATGCTAGGGAGAGCTGCCTATATGGAAGAGCCCTAATGTGTAAAATTA

29755 1 12 0 26  
GGACTTGAAAGAGCCACCACATTTTCACCGAGGCCACGCGGAGTACGATC  
g



AGTGTACAGTGAACAATGCTAGGGAGAGCTGCCTATATGGAAGAGCCCTAA

27704 3 11 0 26 ORF7a-V104del  
CATCAGACAAGAGGAAGTTCAAGAACTTTACTCTCCAATTTTTCTTATTG  
ttg  
CGGCAATAGTGTTTATAACACTTTGCTTCACACTCAAAGAAAGACAGAAT

27555 1 6 0 26 ORF7a-F54fs  
GGAACATACGAGGGCAATTCACCATTTCATCCTCTAGCTGATAACAAATT  
t  
GCACTGACTTGCTTTAGCACTCAATTTGCTTTTGCTTGTCTGACGGCGTA

27870 5 1 0 26 ORF7b-ET39fs  
TAATTATGCTTATTATCTTTTGGTTCTCACTTGAAGTCAAGATCATAAT  
gaa ac  
TTGTCACGCCTAAACGAACATGAAATTTCTTGTTTTCTTAGGAATCATCAC

29868 1 20 0 25  
AATTTTAGTAGTGCTATCCCCATGTGATTTTAATAGCTTCTTAGGAGAAT  
g  
ACAAAAAAAAAAAAAAAAAAAAAAAAAAAAAAAAAAAA

29838 1 15 0 25  
CTATATGGAAGAGCCCTAATGTGTAAAATTAATTTTAGTAGTGCTATCCC  
c  
ATGTGATTTTAATAGCTTCTTAGGAGAATGACAAAAAAAAAAAAAAAAAAAAA

29724 2 15 0 25  
GCAATCTTTAATCAGTGTGTAAACATTAGGGAGGACTTGAAAGAGCCACCA  
ca  
TTTTACCCGAGGCCACGCGGAGTACGATCGAGTGTACAGTGAACAATGCTA

28892 6 14 0 25 N-PA207del  
GTCGCAACAGTTCAAGAAATTCAACTCCAGGCAGCAGTAGGGGAACTTCT  
cct gct  
AGAATGGCTGGCAATGGCGGTGATGCTGCTCTTGCTTTGCTGCTGCTTGAC

9852 3 3 0 25 ORF1a-D3196del  
GCTGTGCACCTTTTTGTAAATAAAGAAATGTATCTAAAGTTGCGTAGTG  
atg  
TGCTATTACCTCTTACGCAATATAATAGATACTTAGCTCTTTATAATAAGT

1650 3 2 0 25 ORF1a-N462del  
TCTTAATGACAACCTTCTTGAAATACTCCAAAAAGAGAAAGTCAACATCA  
ata  
TTGTTGGTGACTTTAACTTAATGAAGAGATCGCCATTATTTTGGCATCTT

21765 1 1 0 25 S-I68fs  
TCAGGACTTGTTCTTACCTTTCTTTTCCAATGTTACTTGTTCCATGCTA  
t  
ACATGTCTCTGGGACCAATGGTACTAAGAGGTTTGATAACCCTGTCCTACC

29781 1 21 0 23  
ACCGAGGCCACGCGGAGTACGATCGAGTGTACAGTGAACAATGCTAGGGA

g  
AGCTGCCTATATGGAAGAGCCCTAATGTGTAAAATTAATTTTAGTAGTGCT

18898 3 17 0 23 ORF1b-V1811del  
CTAGTTGTGATGCAATCATGACTAGGTGTCTAGCTGTCCACGAGTGCTTT  
gtt  
AAGCGTGTTGACTGGACTATTGAATATCCTATAATTGGTGATGAACTGAAG

29760 2 11 0 23  
TGAAAGAGCCACCACATTTTCACCGAGGCCACGCGGAGTACGATCGAGTG  
ta  
CAGTGAACAATGCTAGGGAGAGCTGCCTATATGGAAGAGCCCTAATGTGTA

27700 6 7 0 23 ORF7a-IV103del  
TGTTTCATCAGACAAGAGGAAGTTCAAGAACTTTACTCTCCAATTTTCTT  
att gtt  
GCGGCAATAGTGTTTATAACACTTTGCTTCACACTCAAAGAAAGACAGAA

28093 4 6 0 23 ORF8-SK67fs  
AGCTAGAAAATCAGCACCTTTAATTGAATTGTGCGTGGATGAGGCTGGTT  
cta a  
ATCACCCATTCAGTACATCGATATCGGTAATTATACAGTTTCCTGTTTACC

21583 3 5 0 23 S-L8del  
GTGATGTTCTTGTTAACAACAACTAAACGAACAATGTTTGTTTTCTTGTTTT  
att  
GCCACTAGTCTCTAGTCAGTGTGTTAATCTTACAACCAGAACTCAATTACC

28248 1 14 0 22 ORF8-D119fs  
GTTTCGTTCTATGAAGACTTTTTAGAGTATCATGACGTTTCGTGTTGTTTTA  
g  
ATTTTCATCTAAACGAACAACTAAAATGTCTGATAATGGACCCCAAATCA

8586 3 12 0 22 ORF1a-I2774del  
GATAGCACTTAAGGGTGGTAAAATTGTTAATAATTGGTTGAAGCAGTTAA  
tta  
AAGTTACACTTGTGTTCCTTTTTGTGCTGCTATTTTCTATTTAATAACAC

6519 6 11 0 22 ORF1a-KI2085del  
TACCGAAGTTGTAGGAGACATTATACTTAAACCAGCAAATAATAGTTTAA  
aaa tta  
CAGAAGAGGTTGGCCACACAGATCTAATGGCTGCTTATGTAGACAATTCTA

21773 1 9 0 22 S-S71fs  
TGTTCTTACCTTTCTTTTCCAATGTTACTTGGTTCCATGCTATACATGTC  
t  
CTGGGACCAATGGTACTAAGAGGTTTGATAACCCTGTCCTACCATTTAATG

29792 2 6 0 22  
GCGGAGTACGATCGAGTGTACAGTGAACAATGCTAGGGAGAGCTGCCTAT  
at  
GGAAGAGCCCTAATGTGTAAAATTAATTTTAGTAGTGCTATCCCCATGTGA

28089 5 6 0 22 ORF8-GS66fs

TAGGAGCTAGAAAATCAGCACCTTTAATTGAATTGTGCGTGGATGAGGCT  
ggt tc  
TAAATCACCCATTTCAGTACATCGATATCGGTAATTATACAGTTTCCTGTTT

27987 2 6 0 22 ORF8-V32fs  
CATTTACCAAGAATGTAGTTTACAGTCATGTACTCAACATCAACCATAT  
gt  
AGTTGATGACCCGTGTCCTATTCACCTTCTATTCTAAATGGTATATTAGAGT

28899 3 3 0 22 N-R209del  
CAGTTCAAGAAATTCAACTCCAGGCAGCAGTAGGGGAACTTCTCCTGCTA  
gaa  
TGGCTGGCAATGGCGGTGATGCTGCTCTTGCTTTGCTGCTGCTTGACAGAT

28069 2 1 0 22 ORF8-E59fs  
TTCTAAATGGTATATTAGAGTAGGAGCTAGAAAATCAGCACCTTTAATTG  
aa  
TTGTGCGTGGATGAGGCTGGTTCTAAATCACCCATTTCAGTACATCGATATC

28073 3 1 0 22 ORF8-LC60F  
AAATGGTATATTAGAGTAGGAGCTAGAAAATCAGCACCTTTAATTGAATT  
gtg  
CGTGGATGAGGCTGGTTCTAAATCACCCATTTCAGTACATCGATATCGGTAA

315 3 15 0 21 ORF1a-SL17M  
GATGGAGAGCCTTGTCCTGGTTTCAACGAGAAAACACACGTCCAACCTCA  
gtt  
TGCCTGTTTTACAGGTTTCGCGACGTGCTCGTACGTGGCTTTGGAGACTCCG

29834 1 6 0 21  
CTGCCTATATGGAAGAGCCCTAATGTGTAAAATTAATTTTAGTAGTGCTA  
t  
CCCCATGTGATTTTAATAGCTTCTTAGGAGAATGACAAAAAAAAAAAAAAAAA

26488 5 6 0 21  
TGAATTCTTCTAGAGTTCCTGATCTTCTGGTCTAAACGAACTAAATATTA  
tat ta  
GTTTTTCTGTTTGGAACCTTAATTTTAGCCATGGCAGATTCCAACGGTACT

25704 4 4 0 21 ORF3a-PF104fs  
GTAACAGTTTACTCACACCTTTTGCTCGTTGCTGCTGGCCTTGAAGCCCC  
ttt t  
CTCTATCTTTATGCTTTAGTCTACTTCTTGCAGAGTATAAACTTTGTAAGA

27702 1 1 0 21 ORF7a-I103fs  
TTCATCAGACAAGAGGAAGTTCAAGAACTTTACTCTCCAATTTTTCTTAT  
t  
GTTGCGGCAATAGTGTTTATAACACTTTGCTTCACACTCAAAAGAAAGACA

28025 1 19 0 20 ORF8-K44fs  
CATCAACCATATGTAGTTGATGACCCGTGTCCTATTCACCTTCTATTCTAA  
a  
TGGTATATTAGAGTAGGAGCTAGAAAATCAGCACCTTTAATTGAATTGTGC

28093 2 3 0 20 ORF8-S67fs  
AGCTAGAAAATCAGCACCTTTAATTGAATTGTGCGTGGATGAGGCTGGTT  
ct  
AAATCACCCATTTCAGTACATCGATATCGGTAATTATACAGTTTCCTGTTTA

25710 5 3 0 20 ORF3a-LY106fs  
GTTTACTCACACCTTTTGCTCGTTGCTGCTGGCCTTGAAGCCCCTTTTCT  
cta tc  
TTTATGCTTTAGTCTACTTCTTGCAGAGTATAAACTTTGTAAGAATAATAA

26224 2 2 0 20  
AACCAATTTATGATGAACCGACGACGACTACTAGCGTGCCTTTGTAAGCA  
ca  
AGCTGATGAGTACGAACTTATGTACTCATTTCGTTTCGGAAGAGACAGGTAC

1432 3 16 0 19 ORF1a-NE389K  
TGTCACAATTCAGAAGTAGGACCTGAGCATAGTCTTGCCGAATACCATAA  
tga  
ATCTGGCTTGAAAACCATTCCTTCGTAAGGGTGGTCGCACTATTGCCTTTGG

28069 5 13 0 19 ORF8-EL59fs  
TTCTAAATGGTATATTAGAGTAGGAGCTAGAAAATCAGCACCTTTAATTG  
aat tg  
TGCGTGGATGAGGCTGGTTCTAAATCACCCATTTCAGTACATCGATATCGGT

26466 3 10 0 19 E-V75del  
GTTTACTCTCGTGTTAAAAATCTGAATTCTTCTAGAGTTCCTGATCTTCT  
ggt  
CTAAACGAACTAAATATTATATTAGTTTTTCTGTTTGGAACCTTTAATTTTA

29729 2 9 0 19  
CTTTAATCAGTGTGTAAACATTAGGGAGGACTTGAAAGAGCCACCACATTT  
tc  
ACCGAGGCCACGCGGAGTACGATCGAGTGTACAGTGAACAATGCTAGGGAG

22294 3 8 0 19 S-LH244F  
GATTTGCCAATAGGTATTAACATCACTAGGTTTCAAACCTTTACTTGCTTT  
aca  
TAGAAGTTATTTGACTCCTGGTGATTCTTCTTCAGGTTGGACAGCTGGTGC

29749 5 6 0 19  
TAGGGAGGACTTGAAAGAGCCACCACATTTTCACCGAGGCCACGCGGAGT  
acg at  
CGAGTGTACAGTGAACAATGCTAGGGAGAGCTGCCTATATGGAAGAGCCCT

27882 3 6 0 19 ORF7b-A43del  
TTATCTTTTGTTCTCACTTGAAGTCAAGATCATAATGAACTTGTCAC  
gcc  
TAAACGAACATGAAATTTCTTGTTTTCTTAGGAATCATCACAACCTGTAGCT

28089 6 4 0 19 ORF8-GS66del  
TAGGAGCTAGAAAATCAGCACCTTTAATTGAATTGTGCGTGGATGAGGCT  
ggt tct  
AAATCACCCATTTCAGTACATCGATATCGGTAATTATACAGTTTCCTGTTTA

26487 3 3 0 19  
CTGAATTCTTCTAGAGTTCCTGATCTTCTGGTCTAAACGAACTAAATATT  
ata  
TTAGTTTTTCTGTTTGGAACCTTAATTTTAGCCATGGCAGATTCCAACGGT

22344 3 1 0 19 S-G261del  
ACATAGAAGTTATTTGACTCCTGGTGATTCTTCTTCAGGTTGGACAGCTG  
gtg  
CTGCAGCTTATTATGTGGGTTATCTTCAACCTAGGACTTTTCTATTAAAAT

27722 3 14 0 18 ORF7a-I110del  
TCAAGAACTTTACTCTCCAATTTTCTTATTGTTGCGGCAATAGTGTTTA  
taa  
CACTTTGCTTCACACTCAAAAGAAAGACAGAATGATTGAACTTTCATTAAT

512 6 13 0 18 ORF1a-HV83del  
AGCCCTATGTGTTTCATCAAACGTTTCGGATGCTCGAACTGCACCTCATGGT  
cat gtt  
ATGGTTGAGCTGGTAGCAGAACTCGAAGGCATTCAGTACGGTCGTAGTGGT

27621 3 10 0 18 ORF7a-L77del  
AGCACTCAATTTGCTTTTGCTTGTCTGACGGCGTAAAACACGTCTATCA  
gtt  
ACGTGCCAGATCAGTTTCACCTAACTGTTTCATCAGACAAGAGGAAGTTCA

29749 2 8 0 18  
TAGGGAGGACTTGAAAGAGCCACCACATTTTCACCGAGGCCACGCGGAGT  
ac  
GATCGAGTGTACAGTGAACAATGCTAGGGAGAGCTGCCTATATGGAAGAGC

20409 6 5 0 18 ORF1b-FE2314del  
GGTTTACATCTACTGATTGGACTAGCTAAACGTTTTAAGGAATCACCTTT  
tga att  
AGAAGATTTTATTCCTATGGACAGTACAGTTAAAAACTATTTTCATAACAGA

28769 3 4 0 18 N-T166del  
GCAATCCTGCTAACAATGCTGCAATCGTGCTACAACCTTCCTCAAGGAACA  
aca  
TTGCCAAAAGGCTTCTACGCAGAAGGGAGCAGAGGCGGCAGTCAAGCCTCT

21768 5 2 0 18 S-HV69fs  
GGACTTGTTCTTACCTTTCTTTTCCAATGTTACTTGGTTCCATGCTATAC  
atg tc  
TCTGGGACCAATGGTACTAAGAGGTTTGATAACCCTGTCCTACCATTTAAT

29819 6 2 0 18  
CAATGCTAGGGAGAGCTGCCTATATGGAAGAGCCCTAATGTGTAAAATTA  
att tta  
GTAGTGCTATCCCCATGTGATTTTAATAGCTTCTTAGGAGAATGACAAAAA

29584 1 12 0 17 ORF10-F9fs  
ACTCATGCAGACCACACAAGGCAGATGGGCTATATAAACGTTTTCGCTTT  
t

CCGTTTACGATATATAGTCTACTCTTGTGCAGAATGAATTCTCGTAACTAC

28252 2 11 0 17 ORF8-F120fs  
GTTCTATGAAGACTTTTTAGAGTATCATGACGTTTCGTGTTGTTTTAGATT  
tc  
ATCTAAACGAACAACTAAAATGTCTGATAATGGACCCCAAATCAGCGAA

29750 1 9 0 17  
AGGGAGGACTTGAAAGAGCCACCACATTTTCACCGAGGCCACGCGGAGTA  
c  
GATCGAGTGTACAGTGAACAATGCTAGGGAGAGCTGCCTATATGGAAGAGC

29730 1 7 0 17  
TTTAATCAGTGTGTAACATTAGGGAGGACTTGAAAGAGCCACCACATTTT  
c  
ACCGAGGCCACGCGGAGTACGATCGAGTGTACAGTGAACAATGCTAGGGAG

11083 1 7 0 17 ORF1a-L3606fs  
TCACTTTTAGTTTTAGTCCAGAGTACTCAATGGTCTTTGTTCTTTTTTTT  
g  
TATGAAAATGCCTTTTTACCTTTTGCTATGGGTATTATTGCTATGTCTGCT

27618 6 7 0 17 ORF7a-YQL75\*  
TTTAGCACTCAATTTGCTTTTGCTTGTCTTGACGGCGTAAAACACGTCTA  
tca gtt  
ACGTGCCAGATCAGTTTCACCTAAACTGTTTCATCAGACAAGAGGAAGTTCA

29756 2 5 0 17  
GACTTGAAAGAGCCACCACATTTTCACCGAGGCCACGCGGAGTACGATCG  
ag  
TGTACAGTGAACAATGCTAGGGAGAGCTGCCTATATGGAAGAGCCCTAATG

27762 1 2 0 17 ORF7b-E3fs  
ATAGTGTTTATAACACTTTGCTTCACACTCAAAGAAAGACAGAATGATT  
g  
AACTTTCATTAATTGACTTCTATTTGTGCTTTTTAGCCTTTCTGCTATTCC

27618 2 2 0 17 ORF7a-Y75fs  
TTTAGCACTCAATTTGCTTTTGCTTGTCTTGACGGCGTAAAACACGTCTA  
tc  
AGTTACGTGCCAGATCAGTTTCACCTAAACTGTTTCATCAGACAAGAGGAAG

29784 1 12 0 16  
GAGGCCACGCGGAGTACGATCGAGTGTACAGTGAACAATGCTAGGGAGAG  
c  
TGCCTATATGGAAGAGCCCTAATGTGTAAAATTAATTTTAGTAGTGCTATC

29788 1 12 0 16  
CCACGCGGAGTACGATCGAGTGTACAGTGAACAATGCTAGGGAGAGCTGC  
c  
TATATGGAAGAGCCCTAATGTGTAAAATTAATTTTAGTAGTGCTATCCCCA

27207 1 9 0 16 ORF6-F2fs  
GTAGCAGTGACAATATTGCTTTGCTTGTACAGTAAGTGACAACAGATGTT

t  
CATCTCGTTGACTTTTCAGGTTACTATAGCAGAGATATTACTAATTATTATG

29848    1    15    0    15  
GAGCCCTAATGTGTAAAATTAATTTTAGTAGTGCTATCCCCATGTGATTT

t  
AATAGCTTCTTAGGAGAATGACAAAAAAAAAAAAAAAAAAAAAAAAAAAAA

6686    3    12    0    15 ORF1a-Y2141del  
CTCATGGTTTAGCTGCTGTTAATAGTGTCCCTTGGGATACTATAGCTAAT

tat  
GCTAAGCCTTTTCTTAACAAAGTTGTTAGTACAACACTACTAACATAGTTACA

20425    3    10    0    15 ORF1b-I2320del  
TTGGACTAGCTAAACGTTTTAAGGAATCACCTTTTGAATTAGAAGATTTT

att  
CCTATGGACAGTACAGTTAAAAACTATTTTCATAACAGATGCGCAAACAGGT

29747    1    9    0    15  
ATTAGGGAGGACTTGAAAGAGCCACCACATTTTCACCGAGGCCACGCGGA

g  
TACGATCGAGTGTACAGTGAACAATGCTAGGGAGAGCTGCCTATATGGAAG

8567    3    7    0    15 ORF1a-N2768del  
TTAATGTTGTAAACAACAAAGATAGCACTTAAGGGTGGTAAAATTGTTAAT

aat  
TGGTTGAAGCAGTTAATTAAAGTTACACTTGTGTTCCTTTTTGTGCTGCT

27578    4    7    0    15 ORF7a-QF62fs  
ATTTCATCCTCTAGCTGATAACAAATTTGCACTGACTTGCTTTAGCACTC

aat t  
TGCTTTTGCTTGTCCTGACGGCGTAAAACACGTCTATCAGTTACGTGCCAG

28247    5    7    0    15 ORF8-LD118fs  
TGTTTCGTTCTATGAAGACTTTTTAGAGTATCATGACGTTTCGTGTTGTTTT

aga tt  
TCATCTAAACGAACAAACTAAAATGTCTGATAATGGACCCCAAAATCAGCG

27317    1    6    0    15 ORF6-N39fs  
TAAAGTTTCCATTTGGAATCTTGATTACATCATAAACCTCATAATTAAAA

a  
TTTATCTAAGTCACTAACTGAGAATAAATATTCTCAATTAGATGAAGAGCA

28877    2    6    0    15 N-S202fs  
GTTCCTCATCACGTAGTCGCAACAGTTCAAGAAATTCAACTCCAGGCAGC

ag  
TAGGGGAACTTCTCCTGCTAGAATGGCTGGCAATGGCGGTGATGCTGCTCT

1585    6    4    0    15 ORF1a-EG441del  
GTTCCACGTGCTAGCGCTAACATAGGTTGTAACCATACAGGTGTTGTTGG

aga agg  
TTCCGAAGGTCTTAATGACAACCTTCTTGAAATACTCCAAAAAGAGAAAGT

25517    1    4    0    15 ORF3a-P42fs

TTCAGATTTTGTTCGCGCTACTGCAACGATACCGATACAAGCCTCACTCC  
c  
TTTCGGATGGCTTATTGTTGGCGTTGCACTTCTTGCTGTTTTTCAGAGCGC

23598 3 3 0 15 S-NS679T  
TGACATACCCATTGGTGCAGGTATATGCGCTAGTTATCAGACTCAGACTA  
att  
CTCCTCGGCGGGCACGTAGTGTAGCTAGTCAATCCATCATTGCCTACACTA

29578 6 3 0 15 ORF10-AF8del  
GCCTAAACTCATGCAGACCACACAAGGCAGATGGGCTATATAAACGTTTT  
cgc ttt  
TCCGTTTACGATATATAGTCTACTCTTGTGCAGAATGAATTCTCGTAACTA

29743 6 3 0 15  
TAACATTAGGGAGGACTTGAAAGAGCCACCACATTTTCACCGAGGCCACG  
cgg agt  
ACGATCGAGTGTACAGTGAACAATGCTAGGGAGAGCTGCCTATATGGAAGA

27683 6 1 0 15 ORF7a-YSP97S  
ATCAGTTTTCACCTAAACTGTTTCATCAGACAAGAGGAAGTTCAAGAACTTT  
act ctc  
CAATTTTTCTTATTGTTGCGGCAATAGTGTTTATAAACTTTGCTTCACAC

29762 5 9 0 14  
AAAGAGCCACCACATTTTCACCGAGGCCACGCGGAGTACGATCGAGTGTA  
cag tg  
AACAATGCTAGGGAGAGCTGCCTATATGGAAGAGCCCTAATGTGTAAAATT

21764 6 8 0 14 S-IH68del  
CTCAGGACTTGTTCTTACCTTTCTTTTCCAATGTTACTTGGTTCCATGCT  
ata cat  
GTCTCTGGGACCAATGGTACTAAGAGGTTTGATAACCCTGTCCTACCATTT

22161 3 8 0 14 S-Y200del  
GGGTAATTTCAAAAATCTTAGGGAATTTGTGTTTAAGAATATTGATGGTT  
att  
TTAAATATATTCTAAGCACACGCCTATTAATTTAGTGCGTGATCTCCCTC

23481 3 7 0 14 S-SN640Y  
TATTCATGCAGATCAACTTACTCCTACTTGGCGTGTTTATTCTACAGGTT  
cta  
ATGTTTTTCAAACACGTGCAGGCTGTTTAATAGGGGCTGAACATGTCAACA

25996 3 6 0 14 ORF3a-V202del  
AGATTGGTGGTTATACTGAAAAATGGGAATCTGGAGTAAAAGACTGTGTT  
gta  
TTACACAGTTACTTCACTTCAGACTATTACCAGCTGTACTCAACTCAATTG

7059 3 6 0 14 ORF1a-GY2265D  
TGCTTTAGGTGTTTTAATGTCTAATTTAGGCATGCCTTCTTACTGTACTG  
gtt  
ACAGAGAAGGCTATTTGAACTCTACTAATGTCACTATTGCAACCTACTGTA



21768 2 4 0 14 S-H69fs  
 GGACTTGTTCTTACCTTTCTTTTCCAATGTTACTTGGTTCCATGCTATAC  
 at  
 GTCTCTGGGACCAATGGTACTAAGAGGTTTGATAACCCTGTCCTACCATTT

21771 3 4 0 14 S-VS70A  
 CTTGTTCTTACCTTTCTTTTCCAATGTTACTTGGTTCCATGCTATACATG  
 tct  
 CTGGGACCAATGGTACTAAGAGGTTTGATAACCCTGTCCTACCATTTAATG

12627 3 1 0 14 ORF1a-NL412II  
 AGATAGTAAAATTGTTCAACTTAGTGAAATTAGTATGGACAATTCACCTA  
 att  
 TAGCATGGCCTCTTATTGTAACAGCTTTAAGGGCCAATTCTGCTGTCAAAT

29745 5 1 0 14  
 ACATTAGGGAGGACTTGAAAGAGCCACCACATTTTCACCGAGGCCACGCG  
 gag ta  
 CGATCGAGTGTACAGTGAACAATGCTAGGGAGAGCTGCCTATATGGAAGAG

27909 6 1 0 14 ORF8-FL6del  
 AAGATCATAATGAACTTGTCACGCCTAAACGAACATGAAATTTCTTGTT  
 ttc tta  
 GGAATCATCACAACCTGTAGCTGCATTTACCAAGAATGTAGTTTACAGTCA

29773 1 12 0 13  
 ACATTTTCACCGAGGCCACGCGGAGTACGATCGAGTGTACAGTGAACAAT  
 g  
 CTAGGGAGAGCTGCCTATATGGAAGAGCCCTAATGTGTAAAATTAATTTTA

21547 2 11 0 13 ORF1b-N2694fs  
 TTATAATTAGAGAAAACAACAGAGTTGTTATTTCTAGTGATGTTCTTGTT  
 aa  
 CAACTAAACGAACAATGTTTGTGTTTTCTTGTTTTATTGCCACTAGTCTCTA

29780 1 10 0 13  
 CACCGAGGCCACGCGGAGTACGATCGAGTGTACAGTGAACAATGCTAGGG  
 a  
 GAGCTGCCTATATGGAAGAGCCCTAATGTGTAAAATTAATTTTAGTAGTGC

203 1 8 0 13  
 TTGACAGGACACGAGTAACTCGTCTATCTTCTGCAGGCTGCTTACGGTTT  
 c  
 GTCCGTGTTGCAGCCGATCATCAGCACATCTAGGTTTCGTCCGGGTGTGAC

29734 5 8 0 13  
 ATCAGTGTGTAACATTAGGGAGGACTTGAAAGAGCCACCACATTTTCACC  
 gag gc  
 CACGCGGAGTACGATCGAGTGTACAGTGAACAATGCTAGGGAGAGCTGCCT

29722 3 5 0 13  
 TAGCAATCTTTAATCAGTGTGTAACATTAGGGAGGACTTGAAAGAGCCAC  
 cac  
 ATTTTCACCGAGGCCACGCGGAGTACGATCGAGTGTACAGTGAACAATGCT

26096 6 4 0 13 ORF3a-KIV235I  
ATTGAGTACAGACACTGGTGTGAACATGTTACCTTCTTCATCTACAATA  
aaa ttg  
TTGATGAGCCTGAAGAACATGTCCAAATTCACACAATCGACGGTTCATCCG

21766 5 4 0 13 S-IH68fs  
CAGGACTTGTCTTACCTTTCTTTTCCAATGTTACTTGGTTCCATGCTAT  
aca tg  
TCTCTGGGACCAATGGTACTAAGAGGTTTGATAACCCTGTCCTACCATTTA

29754 3 3 0 13  
AGGACTTGAAAGAGCCACCACATTTTCACCGAGGCCACGCGGAGTACGAT  
cga  
GTGTACAGTGAACAATGCTAGGGAGAGCTGCCTATATGGAAGAGCCCTAAT

6321 3 3 0 13 ORF1a-V2019del  
GTATAAACCAAATACCTGGTGTATACGTTGTCTTTGGAGCACAAAACCAG  
ttg  
AAACATCAAATTCGTTTGATGTACTGAAGTCAGAGGACGCGCAGGGAATGG

6966 1 1 0 13 ORF1a-L2234fs  
TTTGAAGTCACCTAATTTTTCTAAACTGATAAATATTATAATTTGGTTTT  
t  
ACTATTAAGTGTTTGCCTAGGTTCTTTAATCTACTCAACCGCTGCTTTAGG

27579 1 9 0 12 ORF7a-Q62fs  
TTTCATCCTCTAGCTGATAACAAATTTGCACTGACTTGCTTTAGCACTCA  
a  
TTTGCTTTTGCTTGTCCTGACGGCGTAAACACGTCTATCAGTTACGTGCC

29684 1 8 0 12  
ACATAGCACAAGTAGATGTAGTTAACTTTAATCTCACATAGCAATCTTTA  
a  
TCAGTGTGTAACATTAGGGAGGACTTGAAAGAGCCACCACATTTTCACCGA

29754 4 8 0 12  
AGGACTTGAAAGAGCCACCACATTTTCACCGAGGCCACGCGGAGTACGAT  
cga g  
TGTACAGTGAACAATGCTAGGGAGAGCTGCCTATATGGAAGAGCCCTAATG

28881 4 8 0 12 N-RG203fs  
CTCATCACGTAGTCGCAACAGTTCAAGAAATTCAACTCCAGGCAGCAGTA  
ggg g  
AACTTCTCCTGCTAGAAATGGCTGGCAATGGCGGTGATGCTGCTCTTGCTTT

27696 4 7 0 12 ORF7a-FL101fs  
AAACTGTTTCATCAGACAAGAGGAAGTTCAAGAACTTTACTCTCCAATTTT  
tct t  
ATTGTTGCGGCAATAGTGTTTATAACACTTTGCTTCACACTCAAAAGAAAG

27612 1 4 0 12 ORF7a-H73fs  
ACTTGCTTTAGCACTCAATTTGCTTTTGCTTGTCCTGACGGCGTAAACA  
c

GTCTATCAGTTACGTGCCAGATCAGTTTCACCTAAACTGTTCATCAGACAA

137 3 4 0 12  
TGTGGCTGTCACTCGGCTGCATGCTTAGTGCACTCACGCAGTATAATTAA  
taa  
CTAATTACTGTTCGTTGACAGGACACGAGTAACTCGTCTATCTTCTGCAGGC

29406 3 3 0 12 N-ET378A  
AACATTCCCACCAACAGAGCCTAAAAAGGACAAAAAGAAGAAGGCTGATG  
aaa  
CTCAAGCCTTACCGCAGAGACAGAAGAAACAGCAAACCTGTGACTCTTCTTC

25438 3 3 0 12 ORF3a-K16del  
AACTTATGGATTTGTTTATGAGAATCTTCACAATTGGAAGTGAAGTTTG  
aag  
CAAGGTGAAATCAAGGATGCTACTCCTTCAGATTTTGTTCGCGCTACTGCA

27746 1 3 0 12 ORF7a-R118fs  
TCTTATTGTTGCGGCAATAGTGTTTATAACACTTTGCTTCACACTCAAAA  
g  
AAAGACAGAATGATTGAACTTTCATTAATTGACTTCTATTTGTGCTTTTTA

28086 2 3 0 12 ORF8-A65fs  
GAGTAGGAGCTAGAAAATCAGCACCTTTAATTGAATTGTGCGTGGATGAG  
gc  
TGGTTCTAAATCACCCATTCAGTACATCGATATCGGTAATTATACAGTTTC

6503 3 3 0 12 ORF1a-A2080del  
AGTGTAATGTGAAAACCTACCGAAGTTGTAGGAGACATTATACTTAAACCA  
gca  
AATAATAGTTTAAAAATTACAGAAGAGGTTGGCCACACAGATCTAATGGCT

29753 3 3 0 12  
GAGGACTTGAAAGAGCCACCACATTTTCACCGAGGCCACGCGGAGTACGA  
tcg  
AGTGTACAGTGAACAATGCTAGGGAGAGCTGCCTATATGGAAGAGCCCTAA

28869 1 2 0 12 N-P199fs  
CTCTTCTCGTTCCTCATCACGTAGTCGCAACAGTTCAAGAAATTCAACTC  
c  
AGGCAGCAGTAGGGGAACCTTCTCCTGCTAGAATGGCTGGCAATGGCGGTGA

16168 3 2 0 12 ORF1b-D901del  
ATGAGTTAACAGGACACATGTTAGACATGTATTCTGTTATGCTTACTAAT  
gat  
AACACTTCAAGGTATTGGGAACCTGAGTTTTATGAGGCTATGTACACACCG

28133 1 1 0 12 ORF8-T80fs  
GAGGCTGGTTCTAAATCACCCATTCAGTACATCGATATCGGTAATTATAC  
a  
GTTTCCTGTTTACCTTTTACAATTAATTGCCAGGAACCTAAATTGGGTAGT

3221 3 1 0 12 ORF1a-Q986del  
TTCAACCTGAAGAAGAGCAAGAAGAAGATTGGTTAGATGATGATAGTCAA

caa  
ACTGTTGGTCAACAAGACGGCAGTGAGGACAATCAGACAACACTACTATTCAA

22286 3 9 0 11 S-L242del  
CATTGGTAGATTTGCCAATAGGTATTAACATCACTAGGTTTCAAACCTTA  
ctt  
GCTTTACATAGAAGTTATTTGACTCCTGGTGATTCTTCTTCAGGTTGGACA

29753 1 9 0 11  
GAGGACTTGAAAGAGCCACCACATTTTCACCGAGGCCACGCGGAGTACGA  
t  
CGAGTGTACAGTGAACAATGCTAGGGAGAGCTGCCTATATGGAAGAGCCCT

240 2 9 0 11  
CTGCTTACGGTTTCGTCCGTGTTGCAGCCGATCATCAGCACATCTAGGTT  
tc  
GTCCGGGTGTGACCGAAAGGTAAGATGGAGAGCCTTGTCCTGGTTTCAAC

6510 6 8 0 11 ORF1a-NSL2082I  
TGTGAAAACACTACCGAAGTTGTAGGAGACATTATACTTAAACCAGCAAATA  
ata gtt  
TAAAAATTACAGAAGAGGTTGGCCACACAGATCTAATGGCTGCTTATGTAG

26199 3 8 0 11 ORF3a-T271del  
TCCGGAGTTGTTAATCCAGTAATGGAACCAATTTATGATGAACCGACGAC  
gac  
TACTAGCGTGCCTTTGTAAGCACAAGCTGATGAGTACGAACTTATGTACTC

21765 2 7 0 11 S-I68fs  
TCAGGACTTGTTCTTACCTTTCTTTTCCAATGTTACTTGGTTCCATGCTA  
ta  
CATGTCTCTGGGACCAATGGTACTAAGAGGTTTGATAACCCTGTCCTACCA

29762 1 6 0 11  
AAAGAGCCACCACATTTTCACCGAGGCCACGCGGAGTACGATCGAGTGTA  
c  
AGTGAACAATGCTAGGGAGAGCTGCCTATATGGAAGAGCCCTAATGTGTAA

3267 3 6 0 11 ORF1a-T1001del  
TCAACAAACTGTTGGTCAACAAGACGGCAGTGAGGACAATCAGACAACATA  
cta  
TTCAAACAATTGTTGAGGTTCAACCTCAATTAGAGATGGAACCTTACACCAG

29757 3 5 0 11  
ACTTGAAAGAGCCACCACATTTTCACCGAGGCCACGCGGAGTACGATCGA  
gtg  
TACAGTGAACAATGCTAGGGAGAGCTGCCTATATGGAAGAGCCCTAATGTG

29739 5 4 0 11  
TGTGTAACATTAGGGAGGACTTGAAAGAGCCACCACATTTTCACCGAGGC  
cac gc  
GGAGTACGATCGAGTGTACAGTGAACAATGCTAGGGAGAGCTGCCTATATG

27614 3 4 0 11 ORF7a-VY74D

TTGCTTTAGCACTCAATTTGCTTTTGCTTGTCTGACGGCGTAAAACACG  
tct  
ATCAGTTACGTGCCAGATCAGTTTCACCTAAACTGTTTCATCAGACAAGAGG

29722 1 3 0 11  
TAGCAATCTTTAATCAGTGTGTAACATTAGGGAGGACTTGAAAGAGCCAC  
c  
ACATTTTCACCGAGGCCACGCGGAGTACGATCGAGTGTACAGTGAACAATG

3805 3 1 0 11 ORF1a-K1180del  
GTTTGTGTAGATACTGTTTCGCACAAATGTCTACTTAGCTGTCTTTGATAA  
aaa  
TCTCTATGACAAACTTGTTTCAAGCTTTTTTGGAAATGAAGAGTGAAAAGCA

27758 3 1 0 11 ORF7a-\*122fs  
GGCAATAGTGTTTATAACACTTTGCTTCACACTCAAAAGAAAGACAGAAT  
gat  
TGAAC TTTCATTAATTGACTTCTATTTGTGCTTTTTAGCCTTTCTGCTATT

27758 3 1 0 11 ORF7b-M1del  
GGCAATAGTGTTTATAACACTTTGCTTCACACTCAAAAGAAAGACAGAAT  
gat  
TGAAC TTTCATTAATTGACTTCTATTTGTGCTTTTTAGCCTTTCTGCTATT

25710 6 8 0 10 ORF3a-LY108del  
GTTTACTCACACCTTTTGCTCGTTGCTGCTGGCCTTGAAGCCCCTTTTCT  
cta tct  
TTATGCTTTAGTCTACTTCTTGCAGAGTATAAACTTTGTAAGAATAATAAT

447 1 6 0 10 ORF1a-L61fs  
ACATCTTAAAGATGGCACTTGTGGCTTAGTAGAAGTTGAAAAAGGCGTTT  
t  
GCCTCAACTTGAACAGCCCTATGTGTTTCATCAAACGTTTCGGATGCTCGAAC

28260 1 5 0 10  
AAGACTTTTTAGAGTATCATGACGTTTCGTGTTGTTTTAGATTTTCATCTAA  
a  
CGAACAAACTAAAATGTCTGATAATGGACCCCAAAATCAGCGAAATGCACC

29760 3 5 0 10  
TGAAAGAGCCACCACATTTTCACCGAGGCCACGCGGAGTACGATCGAGTG  
tac  
AGTGAACAATGCTAGGGAGAGCTGCCTATATGGAAGAGCCCTAATGTGTAA

1604 3 4 0 10 ORF1a-N447del  
ACATAGGTTGTAACCATAACAGGTGTTGTTGGAGAAGGTTCCGAAGGTCTT  
aat  
GACAACCTTCTTGAAATACTCCAAAAAGAGAAAGTCAACATCAATATTGTT

22009 3 4 0 10 S-N149del  
TTTCAATTTTGTAATGATCCATTTTGGGTGTTTATTACCACAAAAACAA  
caa  
AAGTTGGATGGAAAGTGAGTTCAGAGTTTATTCTAGTGCGAATAATTGCAC

29738 2 4 0 10  
GTGTGTAACATTAGGGAGGACTTGAAAGAGCCACCACATTTTCACCGAGG  
cc  
ACGCGGAGTACGATCGAGTGTACAGTGAACAATGCTAGGGAGAGCTGCCTA

27794 4 4 0 10 ORF7b-FL13fs  
AAGAAAGACAGAATGATTGAACTTTCATTAATTGACTTCTATTTGTGCTT  
ttt a  
GCCTTTCTGCTATTCCTTGTTTTAATTATGCTTATTATCTTTTGGTTCTCA

28153 2 3 0 10 ORF8-T87fs  
CATTCAGTACATCGATATCGGTAATTATACAGTTTCCTGTTTACCTTTTA  
ca  
ATTAATTGCCAGGAACCTAAATTGGGTAGTCTTGTAGTGC GTTGTTCG TTC

29001 1 1 0 10 N-G243fs  
ATTGAACCAGCTTGAGAGCAAAATGTCTGGTAAAGGCCAACAACAACAAG  
g  
CCAAACTGTCACTAAGAAATCTGCTGCTGAGGCTTCTAAGAAGCCTCGGCA

27554 2 1 0 10 ORF7a-F54fs  
TGGAACATACGAGGGCAATTCACCATTTTCATCCTCTAGCTGATAACAAAT  
tt  
GCACTGACTTGCTTTAGCACTCAATTTGCTTTTGCTTGTCTGACGGCGTA

29782 1 9 0 9  
CCGAGGCCACGCGGAGTACGATCGAGTGTACAGTGAACAATGCTAGGGAG  
a  
GCTGCCTATATGGAAGAGCCCTAATGTGTAAAATTAATTTTAGTAGTGCTA

27797 6 8 0 9 ORF7b-LA14del  
AAAGACAGAATGATTGAACTTTCATTAATTGACTTCTATTTGTGCTTTTT  
agc ctt  
TCTGCTATTCCTTGTTTTAATTATGCTTATTATCTTTTGGTTCTCACTTGA

27579 4 8 0 9 ORF7a-QF62fs  
TTTCATCCTCTAGCTGATAACAAATTTGCACTGACTTGCTTTAGCACTCA  
att t  
GCTTTTGCTTGTCTGACGGCGTAAAACACGTCTATCAGTTACGTGCCAGA

3348 3 8 0 9 ORF1a-FS1028C  
ATTAGAGATGGAAGTTACACCAGTTGTTTCAGACTATTGAAGTGAATAGTT  
tta  
GTGGTTATTTAAAACTTACTGACAATGTATACATTAAAAATGCAGACATTG

28066 3 7 0 9 ORF8-IE58K  
CTATTCTAAATGGTATATTAGAGTAGGAGCTAGAAAATCAGCACCTTTAA  
ttg  
AATTGTGCGTGGATGAGGCTGGTTCTAAATCACCCATTTCAGTACATCGATA

27902 1 6 0 9 ORF8-F3fs  
GAACTGCAAGATCATAATGAACTTGTACACGCCTAAACGAACATGAAATT  
t  
CTTGTTTTCTTAGGAATCATCACAACCTGTAGCTGCATTTACCAAGAATGT

26486 3 6 0 9  
TCTGAATTCTTCTAGAGTTCCTGATCTTCTGGTCTAAACGAACTAAATAT  
tat  
ATTAGTTTTTCTGTTTGGAACTTTAATTTTAGCCATGGCAGATTCCAACGG

27384 4 6 0 9 ORF6-D\*61fs  
ACTGAGAATAAATATTCTCAATTAGATGAAGAGCAACCAATGGAGATTGA  
tta a  
ACGAACATGAAAATTATTCTTTTCTTGGCACTGATAAACAACCTCGCTACTTGT

9857 3 5 0 9 ORF1a-L3199del  
GCACCTTTTTGTAAATAAAGAAATGTATCTAAAGTTGCGTAGTGATGTG  
cta  
TTACCTCTTACGCAATATAATAGATACTTAGCTCTTTATAATAAGTACAAG

28902 3 5 0 9 N-MA210T  
TTCAAGAAATTCAACTCCAGGCAGCAGTAGGGGAACTTCTCCTGCTAGAA  
tgg  
CTGGCAATGGCGGTGATGCTGCTCTTGCTTTGCTGCTGCTTGACAGATTGA

3835 3 5 0 9 ORF1a-F1190del  
TACTTAGCTGTCTTTGATAAAAATCTCTATGACAAACTTGTTTCAAGCTT  
ttt  
GGAAATGAAGAGTGAAAAGCAAGTTGAACAAAAGATCGCTGAGATTCCTAA

28905 3 4 0 9 N-A211del  
AAGAAATTCAACTCCAGGCAGCAGTAGGGGAACTTCTCCTGCTAGAATGG  
ctg  
GCAATGGCGGTGATGCTGCTCTTGCTTTGCTGCTGCTTGACAGATTGAACC

28254 2 3 0 9 ORF8-I121fs  
TCTATGAAGACTTTTTAGAGTATCATGACGTTTCGTGTTGTTTTAGATTTC  
at  
CTAAACGAACAACTAAAATGTCTGATAATGGACCCCAAAATCAGCGAAAT

27669 1 2 0 9 ORF7a-E92fs  
CAGTTACGTGCCAGATCAGTTTCACCTAAACTGTTTCATCAGACAAGAGGA  
a  
GTTCAAGAACTTTACTCTCCAATTTTTCTTATTGTTGCGGCAATAGTGTTT

12600 3 2 0 9 ORF1a-SE4112K  
GTGGGAAATCCAACAGGTTGTAGATGCAGATAGTAAAATTGTTCAACTTA  
gtg  
AAATTAGTATGGACAATTCACCTAATTTAGCATGGCCTCTTATTGTAACAG

27682 2 2 0 9 ORF7a-Y97fs  
GATCAGTTTCACCTAAACTGTTTCATCAGACAAGAGGAAGTTCAAGAACTT  
ta  
CTCTCCAATTTTTCTTATTGTTGCGGCAATAGTGTTTATAACACTTTGCTT

28058 1 1 0 9 ORF8-A55fs  
ATTCACTTCTATTCTAAATGGTATATTAGAGTAGGAGCTAGAAAATCAGC  
a

CCTTTAATTGAATTGTGCGTGGATGAGGCTGGTTCTAAATCACCCATTCAG

28056 1 1 0 9 ORF8-A55fs  
CTATTCACCTTCTATTCTAAATGGTATATTAGAGTAGGAGCTAGAAAATCA  
g  
CACCTTTAATTGAATTGTGCGTGGATGAGGCTGGTTCTAAATCACCCATTC

28151 2 1 0 9 ORF8-F86fs  
CCCATTCAGTACATCGATATCGGTAATTATACAGTTTCCTGTTTACCTTT  
ta  
CAATTAATTGCCAGGAACCTAAATTGGGTAGTCTTGTAGTGCGTTGTTTCGT

28061 4 1 0 9 ORF8-PL56fs  
CACTTCTATTCTAAATGGTATATTAGAGTAGGAGCTAGAAAATCAGCACC  
ttt a  
ATTGAATTGTGCGTGGATGAGGCTGGTTCTAAATCACCCATTCAGTACATC

28256 1 5 0 8 ORF8-I121fs  
TATGAAGACTTTTTAGAGTATCATGACGTTTCGTGTTGTTTTAGATTTCAT  
c  
TAAACGAACAACTAAAATGTCTGATAATGGACCCCAAATCAGCGAAATG

27701 2 5 0 8 ORF7a-I103fs  
GTTTCATCAGACAAGAGGAAGTTCAAGAACTTTACTCTCCAATTTTCTTA  
tt  
GTTGCGGCAATAGTGTTTATAACACTTTGCTTCACACTCAAAGAAAGACA

6524 3 4 0 8 ORF1a-T2087del  
AAGTTGTAGGAGACATTATACTTAAACCAGCAAATAATAGTTTAAAAATT  
aca  
GAAGAGGTTGGCCACACAGATCTAATGGCTGCTTATGTAGACAATTCTAGT

3347 6 4 0 8 ORF1a-FS1028del  
AATTAGAGATGGAACTTACACCAGTTGTTTCAGACTATTGAAGTGAATAGT  
ttt agt  
GGTTATTTAAAACTTACTGACAATGTATACATTAAAAATGCAGACATTGTG

28243 6 4 0 8 ORF8-VL117del  
GCGTTGTTTCGTTCTATGAAGACTTTTTAGAGTATCATGACGTTTCGTGTTG  
ttt tag  
ATTTCATCTAAACGAACAACTAAAATGTCTGATAATGGACCCCAAATCA

27577 4 3 0 8 ORF7a-QF62fs  
CATTTTCATCCTCTAGCTGATAACAAATTTGCACTGACTTGCTTTAGCACT  
caa t  
TTGCTTTTGCTTGTCTGACGGCGTAAAACACGTCTATCAGTTACGTGCCA

29742 4 3 0 8  
GTAACATTAGGGAGGACTTGAAAGAGCCACCACATTTTCACCGAGGCCAC  
gcg g  
AGTACGATCGAGTGTACAGTGAACAATGCTAGGGAGAGCTGCCTATATGGA

28245 3 3 0 8 ORF8-L118del  
GTTGTTTCGTTCTATGAAGACTTTTTAGAGTATCATGACGTTTCGTGTTGTT



tta  
GATTTTCATCTAAACGAACAACTAAAATGTCTGATAATGGACCCCCAAAATC

28247 6 2 0 8 ORF8-LD118del  
TGTTTCGTTCTATGAAGACTTTTTAGAGTATCATGACGTTTCGTGTTGTTTT  
aga ttt  
CATCTAAACGAACAACTAAAATGTCTGATAATGGACCCCCAAAATCAGCGA

29819 3 2 0 8  
CAATGCTAGGGAGAGCTGCCTATATGGAAGAGCCCTAATGTGTAAAATTA  
att  
TTAGTAGTGCTATCCCCATGTGATTTTAATAGCTTCTTAGGAGAATGACAA

28250 3 2 0 8 ORF8-F120del  
TCGTTCTATGAAGACTTTTTAGAGTATCATGACGTTTCGTGTTGTTTTAGA  
ttt  
CATCTAAACGAACAACTAAAATGTCTGATAATGGACCCCCAAAATCAGCGA

12783 3 1 0 8 ORF1a-N4173del  
CGGTACTACACAACTGCTTGCCTGATGACAATGCGTTAGCTTACTACA  
aca  
CAACAAAGGGAGGTAGGTTTGTACTTGCCTGTTATCCGATTTACAGGATT

27735 1 1 0 8 ORF7a-F114fs  
TCTCCAATTTTCTTATTGTTGCGGCAATAGTGTTTATAACACTTTGCTT  
c  
ACACTCAAAGAAAGACAGAATGATTGAACTTTCATTAATTGACTTCTATT

28350 3 1 0 8 N-S26del  
GCGAAATGCACCCCGCATTACGTTTGGTGGACCCTCAGATTCAACTGGCA  
gta  
ACCAGAATGGAGAACGCAGTGGGGCGCGATCAAAACAACGTCGGCCCCAAG

16853 3 1 0 8 ORF1b-G1129del  
AAACAGTAAAGTACAAATAGGAGAGTACACCTTTGAAAAAGGTGACTATG  
gtg  
ATGCTGTTGTTTACCGAGGTACAACAACCTTACAAATTAAATGTTGGTGATT

29867 1 7 0 7  
TAATTTTAGTAGTGCTATCCCCATGTGATTTTAATAGCTTCTTAGGAGAA  
t  
GACAAAAAAAAAAAAAAAAAAAAAAAAAAAAAAAAA

523 1 7 0 7 ORF1a-V86fs  
TTCATCAAACGTTTCGGATGCTCGAACTGCACCTCATGGTCATGTTATGGT  
t  
GAGCTGGTAGCAGAACTCGAAGGCATTCAGTACGGTCGTAGTGGTGAGACA

25535 3 7 0 7 ORF3a-V48del  
TACTGCAACGATACCGATACAAGCCTCACTCCCTTTCGGATGGCTTATTG  
ttg  
CGGTTGCACTTCTTGCTGTTTTTCAGAGCGCTTCCAAAATCATAACCCTCA

28253 5 6 0 7 ORF8-FI120fs

TTCTATGAAGACTTTTTAGAGTATCATGACGTTTCGTGTTGTTTTAGATTT  
cat ct  
AAACGAACAAACTAAAATGTCTGATAATGGACCCCAAAATCAGCGAAATGC

29779 1 6 0 7  
TCACCGAGGCCACGCGGAGTACGATCGAGTGTACAGTGAACAATGCTAGG  
g  
AGAGCTGCCTATATGGAAGAGCCCTAATGTGTAAAATTAATTTTAGTAGTG

3345 3 6 0 7 ORF1a-SF1027I  
TCAATTAGAGATGGAACCTTACACCAGTTGTTTCAGACTATTGAAGTGAATA  
gtt  
TTAGTGGTTATTTAAAACTTACTGACAATGTATACATTA AAAATGCAGACA

20339 3 6 0 7 ORF1b-FS2291C  
ACGGTATAAATTAGAAGGCTATGCCTTCGAACATATCGTTTATGGAGATT  
tta  
GTCATAGTCAGTTAGGTGGTTTACATCTACTGATTGGACTAGCTAAACGTT

28103 2 5 0 7 ORF8-P70fs  
TCAGCACCTTTAATTGAATTGTGCGTGGATGAGGCTGGTTCTAAATCACC  
ca  
TTCAGTACATCGATATCGGTAATTATACAGTTTCCTGTTTACCTTTTACAA

28072 4 5 0 7 ORF8-LC60fs  
TAAATGGTATATTAGAGTAGGAGCTAGAAAATCAGCACCTTTAATTGAAT  
tgt g  
CGTGGATGAGGCTGGTTCTAAATCACCCATTCAGTACATCGATATCGGTAA

29585 6 4 0 7 ORF10-PF10del  
CTCATGCAGACCACACAAGGCAGATGGGCTATATAAACGTTTTTCGCTTTT  
ccg ttt  
ACGATATATAGTCTACTCTTGTGCAGAATGAATTCTCGTAACTACATAGCA

29404 3 4 0 7 N-D377del  
AAAACATTCCCACCAACAGAGCCTAAAAAGGACAAAAAGAAGAAGGCTGA  
tga  
AACTCAAGCCTTACCGCAGAGACAGAAGAAACAGCAAACCTGTGACTCTTCT

21762 6 3 0 7 S-AIH67D  
AACTCAGGACTTGTTCTTACCTTTCTTTTCCAATGTTACTTGGTTCCATG  
cta tac  
ATGTCTCTGGGACCAATGGTACTAAGAGGTTTGATAACCCTGTCCTACCAT

27584 4 3 0 7 ORF7a-AF64fs  
TCCTCTAGCTGATAACAAATTTGCACTGACTTGCTTTAGCACTCAATTTG  
ctt t  
TGCTTGTCTGACGGCGTAAAACACGTCTATCAGTTACGTGCCAGATCAGT

28248 5 3 0 7 ORF8-DF119fs  
GTTTCGTTCTATGAAGACTTTTTAGAGTATCATGACGTTTCGTGTTGTTTTA  
gat tt  
CATCTAAACGAACAAACTAAAATGTCTGATAATGGACCCCAAAATCAGCGA

29682 2 3 0 7  
CTACATAGCACAAGTAGATGTAGTTAACTTTAATCTCACATAGCAATCTT  
ta  
ATCAGTGTGTAACATTAGGGAGGACTTGAAAGAGCCACCACATTTTCACCG

27741 1 2 0 7 ORF7a-L116fs  
ATTTTTCTTATTGTTGCGGCAATAGTGTTTATAACACTTTGCTTCACACT  
c  
AAAAGAAAGACAGAATGATTGAACTTTCATTAATTGACTTCTATTTGTGCT

27583 5 2 0 7 ORF7a-AF64fs  
ATCCTCTAGCTGATAACAAATTTGCACTGACTTGCTTTAGCACTCAATTT  
gct tt  
TGCTTGTCTGACGGCGTAAAACACGTCTATCAGTTACGTGCCAGATCAGT

29778 4 2 0 7  
TTCACCGAGGCCACGCGGAGTACGATCGAGTGTACAGTGAACAATGCTAG  
gga g  
AGCTGCCTATATGGAAGAGCCCTAATGTGTAAAATTAATTTTAGTAGTGCT

29823 5 2 0 7  
GCTAGGGAGAGCTGCCTATATGGAAGAGCCCTAATGTGTAAAATTAATTT  
tag ta  
GTGCTATCCCATGTGATTTTAATAGCTTCTTAGGAGAATGACAAAAAAAAA

27266 2 2 0 7 ORF6-F22fs  
TGACTTTCAGGTTACTATAGCAGAGATATTACTAATTATTATGAGGACTT  
tt  
AAAGTTTCCATTTGGAATCTTGATTACATCATAAACCTCATAATTA AAAAAT

27392 1 1 0 7  
TAAATATTCTCAATTAGATGAAGAGCAACCAATGGAGATTGATTAAACGA  
a  
CATGAAAATTATTCTTTTCTTGGCACTGATAACACTCGCTACTTGTGAGCT

1948 3 1 0 7 ORF1a-L562del  
CGATCAATTTTCTCCCGCACTCTTGAAACTGCTCAAAATTCTGTGCGTGT  
ttt  
ACAGAAGGCCGCTATAACAATACTAGATGGAATTCACAGTATTCACTGAG

518 2 6 0 6 ORF1a-M85fs  
ATGTGTTTCATCAAACGTTTCGGATGCTCGAACTGCACCTCATGGTCATGTT  
at  
GGTTGAGCTGGTAGCAGAACTCGAAGGCATTACAGTACGGTCGTAGTGGTGA

25394 2 6 0 6 ORF3a-M1fs  
CTGAGCCAGTGCTCAAAGGAGTCAAATTACATTACACATAAACGAACTTA  
tg  
GATTTGTTTATGAGAATCTTCACAATTGGAAGTGAAGCAAGGT

29772 2 6 0 6  
CACATTTTCACCGAGGCCACGCGGAGTACGATCGAGTGTACAGTGAACAA  
tg  
CTAGGGAGAGCTGCCTATATGGAAGAGCCCTAATGTGTAAAATTAATTTTA

27291 3 6 0 6 ORF6-Y31del  
ATATTACTAATTATTATGAGGACTTTTAAAGTTTCCATTGGAATCTTGA  
tta  
CATCATAAACCTCATAATTAAAAATTTATCTAAGTCACTAACTGAGAATAA

25432 4 5 0 6 ORF3a-TL14fs  
TAAACGAACTTATGGATTTGTTTATGAGAATCTTCACAATTGGAACCTGTA  
act t  
TGAAGCAAGGTGAAATCAAGGATGCTACTCCTTCAGATTTTGTTCGCGCTA

25552 6 5 0 6 ORF3a-AV54del  
TACAAGCCTCACTCCCTTTCGGATGGCTTATTGTTGGCGTTGCACTTCTT  
gct gtt  
TTTCAGAGCGCTTCCAAAATCATAACCCTCAAAAAGAGATGGCAACTAGCA

29764 3 5 0 6  
AGAGCCACCACATTTTCACCGAGGCCACGCGGAGTACGATCGAGTGTACA  
gtg  
AACAATGCTAGGGAGAGCTGCCTATATGGAAGAGCCCTAATGTGTAAAATT

7116 6 5 0 6 ORF1a-GSI2284V  
AGAAGGCTATTTGAACTCTACTAATGTCACTATTGCAACCTACTGTACTG  
gtt cta  
TACCTTGTAGTGTTTGTCTTAGTGGTTTAGATTCTTTAGACACCTATCCTT

29793 1 5 0 6  
CGGAGTACGATCGAGTGTACAGTGAACAATGCTAGGGAGAGCTGCCTATA  
t  
GGAAGAGCCCTAATGTGTAAAATTAATTTTAGTAGTGCTATCCCCATGTGA

29785 2 5 0 6  
AGGCCACGCGGAGTACGATCGAGTGTACAGTGAACAATGCTAGGGAGAGC  
tg  
CCTATATGGAAGAGCCCTAATGTGTAAAATTAATTTTAGTAGTGCTATCCC

77 2 5 0 6  
ACAAACCAACCAACTTTCGATCTCTTGTAGATCTGTTCTCTAAACGAACT  
tt  
AAAATCTGTGTGGCTGTCACTCGGCTGCATGCTTAGTGCACTCACGCAGTA

28244 3 5 0 6 ORF8-L118del  
CGTTGTTCGTTCTATGAAGACTTTTTAGAGTATCATGACGTTTCGTGTTGT  
ttt  
AGATTTTCATCTAAACGAACAACTAAAATGTCTGATAATGGACCCCAAAT

29749 4 4 0 6  
TAGGGAGGACTTGAAAGAGCCACCACATTTTCACCGAGGCCACGCGGAGT  
acg a  
TCGAGTGTACAGTGAACAATGCTAGGGAGAGCTGCCTATATGGAAGAGCCC

27590 4 4 0 6 ORF7a-AC66fs  
AGCTGATAACAAATTTGCACTGACTTGCTTTAGCACTCAATTTGCTTTTG  
ctt g

TCCTGACGGCGTAAACACGTCTATCAGTTACGTGCCAGATCAGTTTCACC

28068 1 4 0 6 ORF8-E59fs  
ATTCTAAATGGTATATTAGAGTAGGAGCTAGAAAATCAGCACCTTTAATT  
g  
AATTGTGCGTGGATGAGGCTGGTTCTAAATCACCCATTTCAGTACATCGATA

27217 6 4 0 6 ORF6-DF6del  
CAATATTGCTTTGCTTGTACAGTAAGTGACAACAGATGTTTCATCTCGTT  
gac ttt  
CAGGTTACTATAGCAGAGATATTACTAATTATTATGAGGACTTTTAAAGTT

21763 1 4 0 6 S-A67fs  
ACTCAGGACTTGTTCTTACCTTTCTTTTCCAATGTTACTTGGTTCCATGC  
t  
ATACATGTCTCTGGGACCAATGGTACTAAGAGGTTTGATAACCCTGTCCTA

27682 1 4 0 6 ORF7a-Y97fs  
GATCAGTTTCACCTAAACTGTTTCATCAGACAAGAGGAAGTTCAAGAACTT  
t  
ACTCTCCAATTTTTCTTATTGTTGCGGCAATAGTGTTTATAACACTTTGCT

27796 2 4 0 6 ORF7b-L14fs  
GAAAGACAGAATGATTGAACTTTCATTAATTGACTTCTATTTGTGCTTTT  
ta  
GCCTTTCTGCTATTCCTTGTTTTAATTATGCTTATTATCTTTTGGTTCTCA

27207 2 4 0 6 ORF6-F2fs  
GTAGCAGTGACAATATTGCTTTGCTTGTACAGTAAGTGACAACAGATGTT  
tc  
ATCTCGTTGACTTTCAGGTTACTATAGCAGAGATATTACTAATTATTATGA

27695 5 4 0 6 ORF7a-FL101fs  
TAAACTGTTTCATCAGACAAGAGGAAGTTCAAGAACTTTACTCTCCAATTT  
ttc tt  
ATTGTTGCGGCAATAGTGTTTATAACACTTTGCTTCACACTCAAAAGAAAG

27697 1 3 0 6 ORF7a-L102fs  
AACTGTTTCATCAGACAAGAGGAAGTTCAAGAACTTTACTCTCCAATTTTT  
c  
TTATTGTTGCGGCAATAGTGTTTATAACACTTTGCTTCACACTCAAAAGAA

3236 3 3 0 6 ORF1a-Q991del  
AGCAAGAAGAAGATTGGTTAGATGATGATAGTCAACAACTGTTGGTCAA  
caa  
GACGGCAGTGAGGACAATCAGACAACACTACTATTCAAACAATTGTTGAGGTT

6573 3 3 0 6 ORF1a-SS2103C  
TACAGAAGAGGTTGGCCACACAGATCTAATGGCTGCTTATGTAGACAATT  
cta  
GTCTTACTATTAAGAAACCTAATGAATTATCTAGAGTATTAGGTTTGAAAA

27602 3 3 0 6 ORF7a-G70del  
ATTTGCACTGACTTGCTTTAGCACTCAATTTGCTTTTGCTTGTCCTGACG

gcg  
TAA AACACGTCTATCAGTTACGTGCCAGATCAGTTTCACCTAAACTGTTCA

11292 5 3 0 6 ORF1a-GF3676fs  
GGTGATGCGTATTATGACATGGTTGGATATGGTTGATACTAGTTTGTCTG  
gtt tt  
AAGCTAAAAGACTGTGTTATGTATGCATCAGCTGTAGTGTTACTAATCCTT

27581 2 3 0 6 ORF7a-F63fs  
TCATCCTCTAGCTGATAACAAATTTGCACTGACTTGCTTTAGCACTCAAT  
tt  
GCTTTTGCTTGTCCTGACGGCGTAA AACACGTCTATCAGTTACGTGCCAGA

11543 3 3 0 6 ORF1a-F3760del  
ACTACTCAGGTGTAGTTACA ACTGT CATGTTTTTGGCCAGAGGTATTGTT  
ttt  
ATGTGTGTTGAGTATTGCCCTATTTTCTTCATAACTGGTAATACACTTCAG

29866 1 2 0 6  
TTAATTTTAGTAGTGCTATCCCCATGTGATTTTAATAGCTTCTTAGGAGA  
a  
TGACAAAAAAAAAAAAAAAAAAAAAAAAAAAAAAAAAAAA

27985 2 2 0 6 ORF8-Y31fs  
TGCATTTACCAAGAATGTAGTTTACAGTCATGTACTCAACATCAACCAT  
at  
GTAGTTGATGACCCGTGTCCTATTCACTTCTATTCTAAATGGTATATTAGA

29719 1 2 0 6  
ACATAGCAATCTTTAATCAGTGTGTAACATTAGGGAGGACTTGAAAGAGC  
c  
ACCACATTTTCACCGAGGCCACGCGGAGTACGATCGAGTGTACAGTGAACA

1457 3 2 0 6 ORF1a-R398del  
AGCATAGTCTTGCCGAATACCATAATGAATCTGGCTTGAAAACCATTTCTT  
cgt  
AAGGGTGGTCGCACTATTGCCTTTGGAGGCTGTGTGTTCTCTTATGTTGGT

29764 1 2 0 6  
AGAGCCACCACATTTTCACCGAGGCCACGCGGAGTACGATCGAGTGTACA  
g  
TGAACAATGCTAGGGAGAGCTGCCTATATGGAAGAGCCCTAATGTGTAAAA

27676 3 2 0 6 ORF7a-E95del  
GTGCCAGATCAGTTTCACCTAAACTGTT CATCAGACAAGAGGAAGTTCAA  
gaa  
CTTTACTCTCCAATTTTCTTATTGTTGCGGCAATAGTGTTTATAACACTT

29766 4 2 0 6  
AGCCACCACATTTTCACCGAGGCCACGCGGAGTACGATCGAGTGTACAGT  
gaa c  
AATGCTAGGGAGAGCTGCCTATATGGAAGAGCCCTAATGTGTAAAATTAAT

25437 6 2 0 6 ORF3a-KQ16del

GAAC TTATGGATTTGTTTATGAGAATCTTCACAATTGGAAC TGTAAC TTT  
gaa gca  
AGGTGAAATCAAGGATGCTACTCCTTCAGATTTTGTTCGCGCTACTGCAAC

923 6 2 0 6 ORF1a-DF220del  
ACCTTCTAGCACGTGCTGGTAAAGCTTCATGCACTTTGTCCGAACA ACTG  
gac ttt  
ATTGACACTAAGAGGGGTGTATACTGCTGCCGTGAACATGAGCATGAAATT

29751 5 2 0 6  
GGGAGGACTTGAAAGAGCCACCACATTTTCACCGAGGCCACGCGGAGTAC  
gat cg  
AGTGTACAGTGAACAATGCTAGGGAGAGCTGCCTATATGGAAGAGCCCTAA

27382 4 2 0 6 ORF6-D\*61fs  
TAACTGAGAATAAATATTCTCAATTAGATGAAGAGCAACCAATGGAGATT  
gat t  
AAACGAACATGAAAATTATTCTTTTCTTGGCACTGATAACACTCGCTACTT

28028 5 2 0 6 ORF8-WY45fs  
CAACCATATGTAGTTGATGACCCGTGTCCTATTCAC TTCTATTCTAAATG  
gta ta  
TTAGAGTAGGAGCTAGAAAATCAGCACCTTTAATTGAATTGTGCGTGGATG

27614 1 2 0 6 ORF7a-V74fs  
TTGCTTTAGCACTCAATTTGCTTTTGCTTGTCTGACGGCGTAAAACACG  
t  
CTATCAGTTACGTGCCAGATCAGTTTCACCTAAACTGTTTCATCAGACAAGA

27910 1 2 0 6 ORF8-F6fs  
AGATCATAATGAAACTTGTACGCCTAAACGAACATGAAATTTCTTGTTT  
t  
CTTAGGAATCATCACA ACTGTAGCTGCATTTACCAAGAATGTAGTTTACA

27616 3 2 0 6 ORF7a-Y75del  
GCTTTAGCACTCAATTTGCTTTTGCTTGTCTGACGGCGTAAAACACGTC  
tat  
CAGTTACGTGCCAGATCAGTTTCACCTAAACTGTTTCATCAGACAAGAGGAA

26514 1 1 0 6  
CTGGTCTAAACGAACTAAATATTATATTAGTTTTTCTGTTTGGAAC TTTA  
a  
TTTTAGCCATGGCAGATTCCAACGGTACTATTACCGTTGAAGAGCTTAAAA

28103 1 1 0 6 ORF8-P70fs  
TCAGCACCTTTAATTGAATTGTGCGTGGATGAGGCTGGTTCTAAATCACC  
c  
ATTCAGTACATCGATATCGGTAATTATACAGTTTCCTGTTTACCTTTTACA

27762 6 1 0 6 ORF7b-EL3del  
ATAGTGTTTATAACACTTTGCTTCACACTCAA AAGAAAGACAGAATGATT  
gaa ctt  
TCATTAATTGACTTCTATTTGTGCTTTT TAGCCTTTCTGCTATTCCTTGTT

28975 3 1 0 6 N-MS234I  
GCTCTTGCTTTGCTGCTGCTTGACAGATTGAACCAGCTTGAGAGCAAAAT  
gtc  
TGGTAAAGGCCAACACAACAAGGCCAACTGTCACTAAGAAATCTGCTGC

28842 6 1 0 6 N-SR190del  
AGAAGGGAGCAGAGGCGGCAGTCAAGCCTCTTCTCGTTCCTCATCACGTA  
gtc gca  
ACAGTTCAAGAAATTCAACTCCAGGCAGCAGTAGGGGAACTTCTCCTGCTA

25520 1 1 0 6 ORF3a-F43fs  
AGATTTTGTTCGCGCTACTGCAACGATACCGATACAAGCCTCACTCCCTT  
t  
CGGATGGCTTATTGTTGGCGTTGCACTTCTTGCTGTTTTTCAGAGCGCTTC

21993 1 5 0 5 S-Y144fs  
TATTAAAGTCTGTGAATTTCAATTTTGTAATGATCCATTTTTGGGTGTTT  
a  
TTACCACAAAAACAACAAAAGTTGGATGGAAAGTGAGTTCAGAGTTTATTC

28030 1 5 0 5 ORF8-Y46fs  
ACCATATGTAGTTGATGACCCGTGTCCTATTCACCTTCTATTCTAAATGGT  
a  
TATTAGAGTAGGAGCTAGAAAATCAGCACCTTTAATTGAATTGTGCGTGGA

28032 1 5 0 5 ORF8-I47fs  
CATATGTAGTTGATGACCCGTGTCCTATTCACCTTCTATTCTAAATGGTAT  
a  
TTAGAGTAGGAGCTAGAAAATCAGCACCTTTAATTGAATTGTGCGTGGATG

24070 3 5 0 5 S-QY836H  
GATCTACTTTTCAACAAAGTGACACTTGCAGATGCTGGCTTCATCAAACA  
ata  
TGGTGATTGCCTTGGTGATATTGCTGCTAGAGACCTCATTTGTGCACAAAA

23484 3 5 0 5 S-NV641I  
TCATGCAGATCAACTTACTCCTACTTGGCGTGTTTATTCTACAGGTTCTA  
atg  
TTTTTCAAACACGTGCAGGCTGTTTAATAGGGGCTGAACATGTCAACAAC

21989 3 5 0 5 S-V143del  
TTGTTATTAAAGTCTGTGAATTTCAATTTTGTAATGATCCATTTTTGGGT  
gtt  
TATTACCACAAAAACAACAAAAGTTGGATGGAAAGTGAGTTCAGAGTTTAT

21715 1 5 0 5 S-T51fs  
GGTGTTTATTACCCTGACAAAGTTTTTCAGATCCTCAGTTTTACATTCAAC  
t  
CAGGACTTGTTCTTACCTTTCTTTTCCAATGTTACTTGGTTCCATGCTATA

29741 3 4 0 5  
TGTAACATTAGGGAGGACTTGAAAGAGCCACCACATTTTCACCGAGGCCA  
cgc  
GGAGTACGATCGAGTGTACAGTGAACAATGCTAGGGAGAGCTGCCTATATG



11289 2 4 0 5 ORF1a-S3675fs  
TTGGGTGATGCGTATTATGACATGGTTGGATATGGTTGATACTAGTTTGT  
ct  
GGTTTTAAGCTAAAAGACTGTGTTATGTATGCATCAGCTGTAGTGTTACTA

242 3 4 0 5  
GCTTACGGTTTCGTCCGTGTTGCAGCCGATCATCAGCACATCTAGGTTTC  
gtc  
CGGGTGTGACCGAAAGGTAAGATGGAGAGCCTTGTCCCTGGTTTCAACGAG

3711 3 4 0 5 ORF1a-L1149del  
GAGTGCTTATGAAAATTTTAATCAGCACGAAGTTCTACTTGCACCATTAT  
tat  
CAGCTGGTATTTTTGGTGCTGACCCTATACATTCTTTAAGAGTTTGTGTAG

21994 2 4 0 5 S-Y144fs  
ATTAAAGTCTGTGAATTTCAATTTTGTAAATGATCCATTTTTGGGTGTTTA  
tt  
ACCACAAAAACAACAAAAGTTGGATGGAAAGTGAGTTCAGAGTTTATTCTA

29745 3 3 0 5  
ACATTAGGGAGGACTTGAAAGAGCCACCACATTTTCACCGAGGCCACGCG  
gag  
TACGATCGAGTGTACAGTGAACAATGCTAGGGAGAGCTGCCTATATGGAAG

25477 3 3 0 5 ORF3a-V29del  
CTGTAACCTTTGAAGCAAGGTGAAATCAAGGATGCTACTCCTTCAGATTTT  
gtt  
CGCGCTACTGCAACGATACCGATACAAGCCTCACTCCCTTTTCGGATGGCTT

28151 1 3 0 5 ORF8-F86fs  
CCCATTACAGTACATCGATATCGGTAATTATACAGTTTCCTGTTTACCTTT  
t  
ACAATTAATTGCCAGGAACCTAAATTGGGTAGTCTTGTAGTGC GTTGTTCG

27720 4 3 0 5 ORF7a-FI109fs  
GTTCAAGAACTTTACTCTCCAATTTTCTTATTGTTGCGGCAATAGTGTT  
tat a  
ACACTTTGCTTCACACTCAAAGAAAGACAGAATGATTGAACTTTCATTAA

27425 1 2 0 5 ORF7a-T11fs  
GGAGATTGATTAAACGAACATGAAAATTATTCTTTTCTTGGCACTGATAA  
c  
ACTCGCTACTTGTGAGCTTTATCACTACCAAGAGTGTGTTAGAGGTACAAC

28253 1 2 0 5 ORF8-F120fs  
TTCTATGAAGACTTTTTAGAGTATCATGACGTTTCGTGTTGTTTTAGATTT  
c  
ATCTAAACGAACAACTAAAATGTCTGATAATGGACCCCAAATCAGCGAA

26158 1 2 0 5 ORF3a-V256fs  
AGCCTGAAGAACATGTCCAAATTCACACAATCGACGGTTCATCCGGAGTT  
g

TTAATCCAGTAATGGAACCAATTTATGATGAACCGACGACGACTACTAGCG

28198    1    2    0    5 ORF8-C102fs  
TTTTACAATTAATTGCCAGGAACCTAAATTGGGTAGTCTTGTAGTGCGTT  
g  
TTCGTTCTATGAAGACTTTTTAGAGTATCATGACGTTTCGTGTTGTTTTAGA  
  
29841    1    2    0    5  
TATGGAAGAGCCCTAATGTGTAAAATTAATTTTAGTAGTGCTATCCCCAT  
g  
TGATTTTAATAGCTTCTTAGGAGAATGACAAAAAAAAAAAAAAAAAAAAA

27422    1    2    0    5 ORF7a-I10fs  
AATGGAGATTGATTAAACGAACATGAAAATTATTCTTTTCTTGCGACTGA  
t  
AACACTCGCTACTTGTGAGCTTTATCACTACCAAGAGTGTGTTAGAGGTAC

27511    2    2    0    5 ORF7a-Y40fs  
GTGTTAGAGGTACAACAGTACTTTTAAAAGAACCTTGCTCTTCTGGAACA  
ta  
CGAGGGCAATTCACCATTTCATCCTCTAGCTGATAACAAATTTGCACTGAC

221    2    2    0    5  
CTCGTCTATCTTCTGCAGGCTGCTTACGGTTTCGTCCGTGTTGCAGCCGA  
tc  
ATCAGCACATCTAGGTTTCGTCCGGGTGTGACCGAAAGGTAAGATGGAGAG

1602    3    2    0    5 ORF1a-LN446H  
TAACATAGGTTGTAACCATACAGGTGTTGTTGGAGAAGGTTCCGAAGGTC  
tta  
ATGACAACCTTCTTGAAATACTCCAAAAAGAGAAAGTCAACATCAATATTG

21632    3    2    0    5 S-L24del  
TATTGCCACTAGTCTCTAGTCAGTGTGTTAATCTTACAACCAGAACTCAA  
tta  
CCCCCTGCATACACTAATTCTTTCACACGTGGTGTTTATTACCCTGACAAA

27515    4    1    0    5 ORF7a-EG41fs  
TAGAGGTACAACAGTACTTTTAAAAGAACCTTGCTCTTCTGGAACATACG  
agg g  
CAATTCACCATTTCATCCTCTAGCTGATAACAAATTTGCACTGACTTGCTT

25718    3    1    0    5 ORF3a-YA109S  
ACACCTTTTGCTCGTTGCTGCTGGCCTTGAAGCCCCCTTTCTCTATCTTT  
atg  
CTTTAGTCTACTTCTTGCAGAGTATAAACTTTGTAAGAATAATAATGAGGC

22295    6    1    0    5 S-HR245del  
ATTTGCCAATAGGTATTAACATCACTAGGTTTCAAACCTTACTTGCTTTA  
cat aga  
AGTTATTTGACTCCTGGTGATTCTTCTTCAGGTTGGACAGCTGGTGCTGCA

27595    3    1    0    5 ORF7a-P68del  
ATAACAAATTTGCACTGACTTGCTTTAGCACTCAATTTGCTTTTGCTTGT

cct  
GACGGCGTAAACACGTCTATCAGTTACGTGCCAGATCAGTTTCACCTAAA

25714 3 1 0 5 ORF3a-L108del  
ACTCACACCTTTTGCTCGTTGCTGCTGGCCTTGAAGCCCCTTTTCTCTAT

ctt  
TATGCTTTAGTCTACTTCTTGCAGAGTATAAACTTTGTAAGAATAATAATG

2933 3 1 0 5 ORF1a-L890del  
GTGTTGTGGCAGATGCTGTCATAAACTTTGCAACCAGTATCTGAATTA

ctt  
ACACCACTGGGCATTGATTTAGATGAGTGGAGTATGGCTACATACTACTTA

27382 1 1 0 5 ORF6-D61fs  
TAACTGAGAATAAAATATTCTCAATTAGATGAAGAGCAACCAATGGAGATT

g  
ATTAAACGAACATGAAAATTATTCTTTTCTTGGCACTGATAACACTCGCTA

29543 5 1 0 5  
TGCAACAATCCATGAGCAGTGCTGACTCAACTCAGGCCTAAACTCATGCA

gac ca  
CACAAGGCAGATGGGCTATATAAACGTTTTTCGCTTTTCCGTTTACGATATA

8963 3 1 0 5 ORF1a-S2900del  
ATTTCTTACCTAGAGTTTTTAGTGCAGTTGGTAACATCTGTTACACACCA

tca  
AAACTTATAGAGTACACTGACTTTGCAACATCAGCTTGTGTTTTGGCTGCT

3905 3 1 0 5 ORF1a-F1214del  
AGCAAGTTGAACAAAAGATCGCTGAGATTCCTAAAGAGGAAGTTAAGCCA

ttt  
ATAACTGAAAGTAAACCTTCAGTTGAACAGAGAAAACAAGATGATAAGAAA

26487 1 4 0 4  
CTGAATTCTTCTAGAGTTCCTGATCTTCTGGTCTAAACGAACTAAATATT

a  
TATTAGTTTTTCTGTTTGGAACCTTTAATTTTAGCCATGGCAGATTCCAACG

28416 3 4 0 4 N-N48del  
ACGCAGTGGGGCGCGATCAAAACAACGTCGGCCCCAAGGTTTACCCAATA

ata  
CTGCGTCTTGGTTCACCGCTCTCACTCAACATGGCAAGGAAGACCTTAAAT

21612 6 4 0 4 S-NL17del  
AATGTTTGTTTTTCTTGTTTTATTGCCACTAGTCTCTAGTCAGTGTGTTA

atc tta  
CAACCAGAACTCAATTACCCCCTGCATACACTAATTCTTTACACGTGGTG

513 6 4 0 4 ORF1a-HVM83L  
GCCCTATGTGTTTCATCAAACGTTTCGGATGCTCGAACTGCACCTCATGGTC

atg tta  
TGGTTGAGCTGGTAGCAGAACTCGAAGGCATTCAGTACGGTCGTAGTGGTG

21575 1 4 0 4 S-L5fs

TATTTCTAGTGATGTTCTTGTTAACAACTAAACGAACAATGTTTGTTTTT  
c  
TTGTTTTATTGCCACTAGTCTCTAGTCAGTGTGTTAATCTTACAACCAGAA

25433    6    4    0    4 ORF3a-TL14del  
AAACGAACCTTATGGATTTGTTTATGAGAATCTTCACAATTGGAACGTGTA  
ctt tga  
AGCAAGGTGAAATCAAGGATGCTACTCCTTCAGATTTTGTTCGCGCTACTG

28242    1    4    0    4 ORF8-V117fs  
TGCGTTGTTCTGTTCTATGAAGACTTTTTAGAGTATCATGACGTTTCGTGTT  
g  
TTTAGATTTTCATCTAAACGAACAACTAAAATGTCTGATAATGGACCCCA

29783    1    4    0    4  
CGAGGCCACGCGGAGTACGATCGAGTGTACAGTGAACAATGCTAGGGAGA  
g  
CTGCCTATATGGAAGAGCCCTAATGTGTAAAATTAATTTTAGTAGTGCTAT

521    1    4    0    4 ORF1a-V86fs  
TGTTTCATCAAACGTTCCGGATGCTCGAACTGCACCTCATGGTCATGTTATG  
g  
TTGAGCTGGTAGCAGAACTCGAAGGCATTCAGTACGGTCGTAGTGGTGAGA

29757    5    4    0    4  
ACTTGAAAGAGCCACCACATTTTCACCGAGGCCACGCGGAGTACGATCGA  
gtg ta  
CAGTGAACAATGCTAGGGAGAGCTGCCTATATGGAAGAGCCCTAATGTGTA

26284    3    4    0    4 E-V14del  
AGTACGAACCTTATGTACTCATTCGTTTCGGAAGAGACAGGTACGTTAATA  
gtt  
AATAGCGTACTTCTTTTTCTTGCTTTCGTGGTATTCTTGCTAGTTACACTA

28252    1    4    0    4 ORF8-F120fs  
GTTCTATGAAGACTTTTTAGAGTATCATGACGTTTCGTGTTGTTTTAGATT  
t  
CATCTAAACGAACAACTAAAATGTCTGATAATGGACCCCAAAATCAGCGA

28094    2    4    0    4 ORF8-S67fs  
GCTAGAAAATCAGCACCTTTAATTGAATTGTGCGTGGATGAGGCTGGTTC  
ta  
AATCACCCATTTCAGTACATCGATATCGGTAATTATACAGTTTCCTGTTTAC

29568    2    4    0    4 ORF10-I4fs  
CTCAACTCAGGCCTAACTCATGCAGACCACACAAGGCAGATGGGCTATA  
ta  
AACGTTTTTCGCTTTTCCGTTTACGATATATAGTCTACTCTTGTGCAGAATG

6654    3    4    0    4 ORF1a-VN2130D  
ATCTAGAGTATTAGGTTTGAAAACCCTTGCTACTCATGGTTTAGCTGCTG  
tta  
ATAGTGCCCTTGGGATACTATAGCTAATTATGCTAAGCCTTTTCTTAACA

27578 2 3 0 4 ORF7a-Q62fs  
ATTTCATCCTCTAGCTGATAACAAATTTGCACTGACTTGCTTTAGCACTC  
aa  
TTTGCTTTTGCTTGTCTGACGGCGTAAACACGTCTATCAGTTACGTGCC

686 2 3 0 4 ORF1a-K141fs  
GTAAGAACGTAATAAAGGAGCTGGTGGCCATAGTTACGGCGCCGATCTA  
aa  
GTCATTTGACTTAGGCGACGAGCTTGGCACTGATCCTTATGAAGATTTTCA

20065 3 3 0 4 ORF1b-K2200del  
ACTTATTTAGAAATGCCCCGTAATGGTGTCTTATTACAGAAGGTAGTGTT  
aaa  
GGTTTACAACCATCTGTAGGTCCCAAACAAGCTAGTCTTAATGGAGTCACA

28069 4 3 0 4 ORF8-EL59fs  
TTCTAAATGGTATATTAGAGTAGGAGCTAGAAAATCAGCACCTTTAATTG  
aat t  
GTGCGTGGATGAGGCTGGTTCTAAATCACCCATTCAGTACATCGATATCGG

25393 3 3 0 4 ORF3a-M1del  
TCTGAGCCAGTGCTCAAAGGAGTCAAATTACATTACACATAAACGAACTT  
atg  
GATTTGTTTATGAGAATCTTCACAATTGGAAGTGTAACTTTGAAGCAAGGT

28253 2 3 0 4 ORF8-F120fs  
TTCTATGAAGACTTTTATAGAGTATCATGACGTTTCGTGTTGTTTTAGATTT  
ca  
TCTAAACGAACAACTAAAATGTCTGATAATGGACCCCAAAATCAGCGAAA

7858 6 3 0 4 ORF1a-NT2531del  
AGACATTCTCTCTCATTTTTGTAACTTAGACAACCTGAGAGCTAATAA  
cac taa  
AGGTTTCATTGCCTATTAATGTTATAGTTTTTGATGGTAAATCAAAATGTGA

28107 3 3 0 4 ORF8-Q72del  
CACCTTTAATTGAATTGTGCGTGGATGAGGCTGGTTCTAAATCACCCATT  
cag  
TACATCGATATCGGTAATTATACAGTTTCCTGTTTACCTTTTACAATTAAT

28915 3 3 0 4 N-G215del  
ACTCCAGGCAGCAGTAGGGGAAGTCTCCTGCTAGAATGGCTGGCAATGG  
cgg  
TGATGCTGCTCTTGCTTTGCTGCTGCTTGACAGATTGAACCAGCTTGAGAG

22740 3 3 0 4 S-T393del  
TTTTAAGTGTTATGGAGTGTCTCCTACTAAATTAAATGATCTCTGCTTTA  
cta  
ATGTCTATGCAGATTCATTTGTAATTAGAGGTGATGAAGTCAGACAAATCG

21992 1 3 0 4 S-Y144fs  
TTATTAAGTCTGTGAATTTCAATTTTGTAATGATCCATTTTTGGGTGTT  
t  
ATTACCACAAAAACAACAAAAGTTGGATGGAAAGTGAGTTCAGAGTTTATT

13937 3 3 0 4 ORF1b-V157del  
CAATTGTTGTGATGATGATTATTTCAATAAAAAGGACTGGTATGATTTTG  
tag  
AAAACCCAGATATATTACGCGTATACGCCAACTTAGGTGAACGTGTACGCC

27768 6 3 0 4 ORF7b-SL5del  
TTTATAACACTTTGCTTCACACTCAAAAGAAAGACAGAATGATTGAACTT  
tca tta  
ATTGACTTCTATTTGTGCTTTTTAGCCTTTCTGCTATTCCTTGTTTTAATT

25393 1 2 0 4 ORF3a-M1fs  
TCTGAGCCAGTGCTCAAAGGAGTCAAATTACATTACACATAAACGAACTT  
a  
TGGATTTGTTTATGAGAATCTTCACAATTGGAAGTGTAACTTTGAAGCAAG

27774 1 2 0 4 ORF7b-I7fs  
ACACTTTGCTTCACACTCAAAAGAAAGACAGAATGATTGAACTTTCATTA  
a  
TTGACTTCTATTTGTGCTTTTTAGCCTTTCTGCTATTCCTTGTTTTAATTA

28065 1 2 0 4 ORF8-I58fs  
TCTATTCTAAATGGTATATTAGAGTAGGAGCTAGAAAATCAGCACCTTTA  
a  
TTGAATTGTGCGTGGATGAGGCTGGTTCTAAATCACCCATTACGTACATCG

28910 2 2 0 4 N-N213fs  
ATTCAACTCCAGGCAGCAGTAGGGGAACTTCTCCTGCTAGAATGGCTGGC  
aa  
TGGCGGTGATGCTGCTCTTGCTTTGCTGCTGCTTGACAGATTGAACCAGCT

3341 6 2 0 4 ORF1a-NS1026del  
AACCTCAATTAGAGATGGAACTTACACCAGTTGTTTCAGACTATTGAAGTG  
aat agt  
TTTAGTGGTTATTTAAAACTTACTGACAATGTATACATTAATAAATGCAGAC

28158 4 2 0 4 ORF8-NC89fs  
AGTACATCGATATCGGTAATTATACAGTTTCCTGTTTACCTTTTACAATT  
aat t  
GCCAGGAACCTAAATTGGGTAGTCTTGTTAGTGCGTTGTTTCGTTCTATGAAG

29814 6 2 0 4  
GTGAACAATGCTAGGGAGAGCTGCCTATATGGAAGAGCCCTAATGTGTAA  
aat taa  
TTTAGTAGTGCTATCCCCATGTGATTTTAATAGCTTCTTAGGAGAATGAC

6524 6 2 0 4 ORF1a-TE2087del  
AAGTTGTAGGAGACATTATACTTAAACCAGCAAATAATAGTTTAAAAATT  
aca gaa  
GAGGTTGGCCACACAGATCTAATGGCTGCTTATGTAGACAATTCTAGTCTT

27636 3 2 0 4 ORF7a-V82del  
TTTGCTTGTCCTGACGGCGTAAACACGTCTATCAGTTACGTGCCAGATC  
agt

TTCACCTAAACTGTTTCATCAGACAAGAGGAAGTTCAAGAACTTTACTCTCC

27633 2 2 0 4 ORF7a-R80fs  
GCTTTTGCTTGTCTGACGGCGTAAACACGTCTATCAGTTACGTGCCAG  
at  
CAGTTTCACCTAAACTGTTTCATCAGACAAGAGGAAGTTCAAGAACTTTACT

11586 3 2 0 4 ORF1a-N3774del  
TATTGTTTTTATGTGTGTTGAGTATTGCCCTATTTTCTTCATAACTGGTA  
ata  
CACTTCAGTGTATAATGCTAGTTTATTGTTTCTTAGGCTATTTTTGTACTT

27371 1 2 0 4 ORF6-P57fs  
ATCTAAGTCACTAACTGAGAATAAATATTCTCAATTAGATGAAGAGCAAC  
c  
AATGGAGATTGATTAAACGAACATGAAAATTATTCTTTTCTTGGCACTGAT

27903 1 2 0 4 ORF8-L4fs  
AACTGCAAGATCATAATGAACTTGTACGCCTAAACGAACATGAAATTT  
c  
TTGTTTTCTTAGGAATCATCACAACCTGTAGCTGCATTTACCAAGAATGTA

98 1 2 0 4  
CTCTTGTAGATCTGTTCTCTAAACGAACTTTAAAATCTGTGTGGCTGTCA  
c  
TCGGCTGCATGCTTAGTGCACCTCACGCAGTATAATTAATAACTAATTACTG

203 2 2 0 4  
TTGACAGGACACGAGTAACTCGTCTATCTTCTGCAGGCTGCTTACGGTTT  
cg  
TCCGTGTTGCAGCCGATCATCAGCACATCTAGGTTTCGTCCGGGTGTGACC

27625 2 2 0 4 ORF7a-R78fs  
CTCAATTTGCTTTTGCTTGTCTGACGGCGTAAACACGTCTATCAGTTA  
cg  
TGCCAGATCAGTTTCACCTAAACTGTTTCATCAGACAAGAGGAAGTTCAAGA

25499 6 2 0 4 ORF3a-PI36del  
AATCAAGGATGCTACTCCTTCAGATTTTGTTCGCGCTACTGCAACGATAC  
cga tac  
AAGCCTCACTCCCTTTCGGATGGCTTATTGTTGGCGTTGCACTTCTTGCTG

27804 2 2 0 4 ORF7b-L17fs  
GAATGATTGAACTTTCATTAATTGACTTCTATTTGTGCTTTTTAGCCTTT  
ct  
GCTATTCCTTGTTTTAATTATGCTTATTATCTTTTGGTTCTCACTTGAAC

27906 1 2 0 4 ORF8-V5fs  
TGCAAGATCATAATGAACTTGTACGCCTAAACGAACATGAAATTTCTT  
g  
TTTTCTTAGGAATCATCACAACCTGTAGCTGCATTTACCAAGAATGTAGTT

28090 1 2 0 4 ORF8-G66fs  
AGGAGCTAGAAAATCAGCACCTTTAATTGAATTGTGCGTGGATGAGGCTG

g  
TTCTAAATCACCCATTTCAGTACATCGATATCGGTAATTATACAGTTTCCTG

29757    1    2    0    4  
ACTTGAAAGAGCCACCACATTTTCACCGAGGCCACGCGGAGTACGATCGA

g  
TGTACAGTGAACAATGCTAGGGAGAGCTGCCTATATGGAAGAGCCCTAATG

27289    4    2    0    4 ORF6-DY30fs  
AGATATTACTAATTATTATGAGGACTTTTAAAGTTTCCATTTGGAATCTT

gat t  
ACATCATAAACCTCATAATTA AAAATTTATCTAAGTCACTAACTGAGAATA

27628    2    2    0    4 ORF7a-A79fs  
AATTTGCTTTTGCTTGTCTGACGGCGTAAACACGTCTATCAGTTACGT

gc  
CAGATCAGTTTCACCTAAACTGTTTCATCAGACAAGAGGAAGTTCAAGAACT

28916    2    2    0    4 N-G215fs  
CTCCAGGCAGCAGTAGGGGA ACTTCTCCTGCTAGAAATGGCTGGCAATGGC

gg  
TGATGCTGCTCTTGCTTTGCTGCTGCTTGACAGATTGAACCAGCTTGAGAG

29736    3    2    0    4  
CAGTGTGTAACATTAGGGAGGACTTGAAAGAGCCACCACATTTTCACCGA

ggc  
CACGCGGAGTACGATCGAGTGTACAGTGAACAATGCTAGGGAGAGCTGCCT

1599    6    2    0    4 ORF1a-GLN445D  
CGCTAACATAGGTTGTAACCATACAGGTGTTGTTGGAGAAGGTTCCGAAG

gtc tta  
ATGACAACCTTCTTGAAATACTCCAAAAAGAGAAAGTCAACATCAATATTG

27906    3    2    0    4 ORF8-V5del  
TGCAAGATCATAATGAAACTTGTCACGCCTAAACGAACATGAAATTTCTT

gtt  
TTCTTAGGAATCATCACA ACTGTAGCTGCATTTACCAAGAATGTAGTTTA

25520    2    2    0    4 ORF3a-F43fs  
AGATTTTGTTCGCGCTACTGCAACGATACCGATACAAGCCTCACTCCCTT

tc  
GGATGGCTTATTGTTGGCGTTGCACTTCTTGCTGTTTTTCAGAGCGCTTCC

27622    2    2    0    4 ORF7a-L77fs  
GCACTCAATTTGCTTTTGCTTGTCTGACGGCGTAAACACGTCTATCAG

tt  
ACGTGCCAGATCAGTTTCACCTAAACTGTTTCATCAGACAAGAGGAAGTTCA

28171    6    1    0    4 ORF8-PK93del  
CGGTAATTATACAGTTTCCTGTTTACCTTTTACAATTAATTGCCAGGAAC

cta aat  
TGGGTAGTCTTG TAGTGCGTTGTTTCGTTCTATGAAGACTTTTTAGAGTATC

29774    4    1    0    4



CATTTTCACCGAGGCCACGCGGAGTACGATCGAGTGTACAGTGAACAATG  
cta g  
GGAGAGCTGCCTATATGGAAGAGCCCTAATGTGTAAAATTAATTTTAGTAG

1938 3 1 0 4 ORF1a-SV558L  
TCGTGTTGTACGATCAATTTTCTCCCGCACTCTTGAAACTGCTCAAAATT  
ctg  
TGCGTGTTTTACAGAAGGCCGCTATAACAATACTAGATGGAATTTACACAGT

22127 6 1 0 4 S-LR189del  
CTCAGCCTTTTCTTATGGACCTTGAAGGAAAACAGGGTAATTTCAAAAAT  
ctt agg  
GAATTTGTGTTTAAGAATATTGATGGTTATTTTAAAATATATTCTAAGCAC

27572 1 1 0 4 ORF7a-S60fs  
TTCACCATTTCATCCTCTAGCTGATAACAAATTTGCACTGACTTGCTTTA  
g  
CACTCAATTTGCTTTTGCTTGTCTGACGGCGTAAAACACGTCTATCAGTT

25855 3 1 0 4 ORF3a-D155del  
CATTACTTTATGATGCCAACTATTTTCTTTGCTGGCATACTAATTGTTAC  
gac  
TATTGTATACCTTACAATAGTGTAACCTTCTTCAATTGTCATTACTTCAGGT

21771 1 1 0 4 S-V70fs  
CTTGTTCTTACCTTTCTTTTCCAATGTTACTTGGTTCCATGCTATACATG  
t  
CTCTGGGACCAATGGTACTAAGAGGTTTGATAACCCTGTCCTACCATTAA

519 1 1 0 4 ORF1a-M85fs  
TGTGTTTCATCAAACGTTTCGGATGCTCGAACTGCACCTCATGGTCATGTTA  
t  
GGTTGAGCTGGTAGCAGAACTCGAAGGCATTTCAGTACGGTCGTAGTGGTGA

28246 2 1 0 4 ORF8-L118fs  
TTGTTTCGTTCTATGAAGACTTTTATAGAGTATCATGACGTTTCGTGTTGTTT  
ta  
GATTTTCATCTAAACGAACAACTAAAATGTCTGATAATGGACCCCAAATC

21765 5 1 0 4 S-IH68fs  
TCAGGACTTGTTCTTACCTTTCTTTTCCAATGTTACTTGGTTCCATGCTA  
tac at  
GTCTCTGGGACCAATGGTACTAAGAGGTTTGATAACCCTGTCCTACCATT

29748 6 1 0 4  
TTAGGGAGGACTTGAAAGAGCCACCACATTTTCACCGAGGCCACGCGGAG  
tac gat  
CGAGTGTACAGTGAACAATGCTAGGGAGAGCTGCCTATATGGAAGAGCCCT

28206 4 1 0 4 ORF8-YE105fs  
TTAATTGCCAGGAACCTAAATTGGGTAGTCTTGTAAGTGCGTTGTTTCGTTT  
tat g  
AAGACTTTTATAGAGTATCATGACGTTTCGTGTTGTTTTAGATTTTCATCTAAA

27293 1 3 0 3 ORF6-Y31fs  
ATTACTAATTATTATGAGGACTTTTAAAGTTTCCATTTGGAATCTTGATT  
a  
CATCATAAACCTCATAATTAAAAATTTATCTAAGTCACTAACTGAGAATAA

29860 1 3 0 3  
GTAAATTAATTTTAGTAGTGCTATCCCCATGTGATTTTAATAGCTTCTT  
a  
GGAGAATGACAAAAAAAAAAAAAAAAAAAAAAAAAAAAAAAAA

29869 1 3 0 3  
ATTTTAGTAGTGCTATCCCCATGTGATTTTAATAGCTTCTTAGGAGAATG  
a  
CAAAAAAAAAAAAAAAAAAAAAAAAAAAAAAAAAA

29767 2 3 0 3  
GCCACCACATTTTCACCGAGGCCACGCGGAGTACGATCGAGTGTACAGTG  
aa  
CAATGCTAGGGAGAGCTGCCTATATGGAAGAGCCCTAATGTGTAAAATTAA

3672 6 3 0 3 ORF1a-ENF1136V  
CCCAAATGTTAACAAAGGTGAAGACATTCAACTTCTTAAGAGTGCTTATG  
aaa att  
TTAATCAGCACGAAGTTCTACTTGCACCATTATTATCAGCTGGTATTTTTG

29768 4 3 0 3  
CCACCACATTTTCACCGAGGCCACGCGGAGTACGATCGAGTGTACAGTGA  
aca a  
TGCTAGGGAGAGCTGCCTATATGGAAGAGCCCTAATGTGTAAAATTAATTT

9859 2 3 0 3 ORF1a-L3198fs  
ACTTTTTTGTAAATAAAGAAATGTATCTAAAGTTGCGTAGTGATGTGCT  
at  
TACCTCTTACGCAATATAATAGATACTTAGCTCTTTATAATAAGTACAAGT

15824 1 3 0 3 ORF1b-S786fs  
CATAAAGAACTTTAAGTCAGTTCTTTATTATCAAAACAATGTTTTTATGT  
c  
TGAAGCAAAATGTTGGACTGAGACTGACCTTACTAAAGGACCTCATGAATT

29743 5 3 0 3  
TAACATTAGGGAGGACTTGAAAGAGCCACCACATTTTCACCGAGGCCACG  
cgg ag  
TACGATCGAGTGTACAGTGAACAATGCTAGGGAGAGCTGCCTATATGGAAG

2574 3 3 0 3 ORF1a-T770del  
AGAGGAAGTTGTCTTGAAAAGTGGTGATTTACAACCATTAGAACAACCTA  
cta  
GTGAAGCTGTTGAAGCTCCATTGGTTGGTACACCAGTTTGTATTAACGGGC

29751 1 3 0 3  
GGGAGGACTTGAAAGAGCCACCACATTTTCACCGAGGCCACGCGGAGTAC  
g  
ATCGAGTGTACAGTGAACAATGCTAGGGAGAGCTGCCTATATGGAAGAGCC

29759 1 3 0 3  
TTGAAAGAGCCACCACATTTTCACCGAGGCCACGCGGAGTACGATCGAGT  
g  
TACAGTGAACAATGCTAGGGAGAGCTGCCTATATGGAAGAGCCCTAATGTG

12041 6 3 0 3 ORF1a-DI3926del  
AAAAAATGGTTTCACTACTTTCTGTTTTGCTTTCCATGCAGGGTGCTGTA  
gac ata  
AACAAAGCTTTGTGAAGAAATGCTGGACAACAGGGCAACCTTACAAGCTATA

29734 6 3 0 3  
ATCAGTGTGTAACATTAGGGAGGACTTGAAAGAGCCACCACATTTTCACC  
gag gcc  
ACGCGGAGTACGATCGAGTGTACAGTGAACAATGCTAGGGAGAGCTGCCTA

21985 6 3 0 3 S-LGV141F  
AATGTTGTTATTAAAGTCTGTGAATTTCAATTTTGTAATGATCCATTTTT  
ggg tgt  
TTATTACCACAAAAACAACAAAAGTTGGATGGAAAGTGAGTTCAGAGTTTA

3353 3 3 0 3 ORF1a-G1030del  
AGATGGAACCTACACCAGTTGTTTCAGACTATTGAAGTGAATAGTTTTAGT  
ggt  
TATTTAAACTTACTGACAATGTATACATTAATAATGCAGACATTGTGGAA

25244 3 3 0 3 S-V1228del  
AATGGCCATGGTACATTTGGCTAGGTTTTATAGCTGGCTTGATTGCCATA  
gta  
ATGGTGACAATTATGCTTTGCTGTATGACCAGTTGCTGTAGTTGTCTCAAG

25429 6 3 0 3 ORF3a-VT13del  
ACATAAACGAACTTATGGATTTGTTTATGAGAATCTTCACAATTGGAAC  
gta act  
TTGAAGCAAGGTGAAATCAAGGATGCTACTCCTTCAGATTTTGTTTCGCGCT

510 3 3 0 3 ORF1a-GH82D  
ACAGCCCTATGTGTTTCATCAAACGTTTCGGATGCTCGAACTGCACCTCATG  
gtc  
ATGTTATGGTTGAGCTGGTAGCAGAACTCGAAGGCATTCAGTACGGTCGTA

27588 1 3 0 3 ORF7a-F65fs  
CTAGCTGATAACAAATTTGCACTGACTTGCTTTAGCACTCAATTTGCTTT  
t  
GCTTGTCTGACGGCGTAAAACACGTCTATCAGTTACGTGCCAGATCAGTT

202 2 3 0 3  
GTTGACAGGACACGAGTAACTCGTCTATCTTCTGCAGGCTGCTTACGGTT  
tc  
GTCCGTGTTGCAGCCGATCATCAGCACATCTAGGTTTCGTCCGGGTGTGAC

27555 2 3 0 3 ORF7a-F54fs  
GGAACATACGAGGGCAATTCACCATTTCATCCTCTAGCTGATAACAAATT  
tg

CACTGACTTGCTTTAGCACTCAATTTGCTTTTGCTTGTCTGACGGCGTAA

25475 2 3 0 3 ORF3a-F28fs  
AACTGTAAC TTTGAAGCAAGGTGAAATCAAGGATGCTACTCCTTCAGATT  
tt  
GTTTCGCGCTACTGCAACGATACCGATACAAGCCTCACTCCCTTTTCGGATGG

25532 2 3 0 3 ORF3a-I47fs  
CGCTACTGCAACGATACCGATACAAGCCTCACTCCCTTTTCGGATGGCTTA  
tt  
GTTGGCGTTGCACTTCTTGCTGTTTTTCAGAGCGCTTCCAAAATCATAACC

25829 2 3 0 3 ORF3a-F146fs  
TTGCTGGAAATGCCGTTCCAAAAACCCATTACTTTATGATGCCAACTATT  
tt  
CTTTGCTGGCATACTAATTGTTACGACTATTGTATACCTTACAATAGTGTA

28066 2 3 0 3 ORF8-I58fs  
CTATTCTAAATGGTATATTAGAGTAGGAGCTAGAAAATCAGCACCTTTAA  
tt  
GAATTGTGCGTGGATGAGGCTGGTTCTAAATCACCCATTCAGTACATCGAT

27553 3 3 0 3 ORF7a-F54del  
CTGGAACATACGAGGGCAATTCACCATTTTCATCCTCTAGCTGATAACAAA  
ttt  
GCACTGACTTGCTTTAGCACTCAATTTGCTTTTGCTTGTCTGACGGCGTA

11293 4 3 0 3 ORF1a-GF3676fs  
GTGATGCGTATTATGACATGGTTGGATATGGTTGATACTAGTTTGTCTGG  
ttt t  
AAGCTAAAAGACTGTGTTATGTATGCATCAGCTGTAGTGTTACTAATCCTT

139 1 2 0 3  
TGGCTGTCACCTCGGCTGCATGCTTAGTGCACTCACGCAGTATAATTAATA  
a  
CTAATTACTGTCGTTGACAGGACACGAGTAACTCGTCTATCTTCTGCAGGC

21611 3 2 0 3 S-N17del  
CAATGTTTGT TTTTCTTGTTTATTGCCACTAGTCTCTAGTCAGTGTGTT  
aat  
CTTACAACCAGAACTCAATTACCCCTGCATACACTAATTCTTTCACACGT

27578 3 2 0 3 ORF7a-QF62L  
ATTTCATCCTCTAGCTGATAACAAATTTGCACTGACTTGCTTTAGCACTC  
aat  
TTGCTTTTGCTTGTCTGACGGCGTAAAACACGTCTATCAGTTACGTGCCA

22193 6 2 0 3 S-NL211del  
TTAAGAATATTGATGGTTATTTTAAAATATATTCTAAGCACACGCCTATT  
aat tta  
GTGCGTGATCTCCCTCAGGGTTTTTCGGCTTTAGAACCATTGGTAGATTTG

19865 3 2 0 3 ORF1b-N2133del  
AGTACCAGAGGTGAAAATACTCAATAATTTGGGTGTGGACATTGCTGCTA

ata  
CTGTGATCTGGGACTACAAAAGAGATGCTCCAGCACATATATCTACTATTG

29815    5    2    0    3  
TGAACAATGCTAGGGAGAGCTGCCTATATGGAAGAGCCCTAATGTGTAAA

att aa  
TTTtagtagtgctatccccatgtgatttttaatagcttcttaggagaatgac

29857    1    2    0    3  
TGTGTAAAATTAATTTTtagtagtgctatccccatgtgatttttaatagctt

c  
TTAGGAGAATGACAAAAAAAAAAAAAAAAAAAAAAAAAAAAAAAAAAAA

697    1    2    0    3 ORF1a-D144fs  
AATAAAGGAGCTGGTGGCCATAGTTACGGCGCCGATCTAAAGTCATTTGA

c  
TTAGGCGACGAGCTTGGCACTGATCCTTATGAAGATTTTCAAGAAAACCTGG

12789    3    2    0    3 ORF1a-T4175del  
TACACAAACTGCTTGCCTGATGACAATGCGTTAGCTTACTACAACACAA

caa  
AGGGAGGTAGGTTTGTACTTGCCTGTTATCCGATTTACAGGATTTGAAAT

29730    4    2    0    3  
TTTAATCAGTGTGTAACATTAGGGAGGACTTGAAAGAGCCACCACATTTT

cac c  
GAGGCCACGCGGAGTACGATCGAGTGTACAGTGAACAATGCTAGGGAGAGC

29686    4    2    0    3  
ATAGCACAAGTAGATGTAGTTAACTTTAATCTCACATAGCAATCTTTAAT

cag t  
GTGTAACATTAGGGAGGACTTGAAAGAGCCACCACATTTTCACCGAGGCCA

29733    2    2    0    3  
AATCAGTGTGTAACATTAGGGAGGACTTGAAAGAGCCACCACATTTTCAC

cg  
AGGCCACGCGGAGTACGATCGAGTGTACAGTGAACAATGCTAGGGAGAGCT

28236    6    2    0    3 ORF8-RV115del  
TTGTAGTGC GTTGTTCGTTCTATGAAGACTTTTtagagtatcatgacgTT

cgt gtt  
GTTTTAGATTTcatctaaacgaacaaactaaaatgtctgataatggacccc

27434    3    2    0    3 ORF7a-TC14S  
TTAAACGAACATGAAAATTATTCTTTTCTTGGCACTGATAACACTCGCTA

ctt  
GTGAGCTTTATCACTACCAAGAGTGTGTTAGAGGTACAACAGTACTTTTAA

27877    1    2    0    3 ORF7b-C41fs  
GCTTATTATCTTTTGGTTCTCACTTGAAGATCATAATGAAACTT

g  
TCACGCCTAAACGAACATGAAATTTCTTGTTTTCTTAGGAATCATCACAAC

28914    1    2    0    3 N-G214fs

AACTCCAGGCAGCAGTAGGGGAACTTCTCCTGCTAGAAATGGCTGGCAATG  
g  
CGGTGATGCTGCTCTTGCTTTGCTGCTGCTTGACAGATTGAACCAGCTTGA

28248 2 2 0 3 ORF8-D119fs  
GTTTCGTTCTATGAAGACTTTTTAGAGTATCATGACGTTTCGTGTTGTTTTA  
ga  
TTTCATCTAAACGAACAACTAAAATGTCTGATAATGGACCCCAAAATCAG

25424 6 2 0 3 ORF3a-GT11del  
ATTACACATAAACGAACCTTATGGATTTGTTTATGAGAATCTTCACAATTG  
gaa ctg  
TAACTTTGAAGCAAGGTGAAATCAAGGATGCTACTCCTTCAGATTTTGTTC

28907 5 2 0 3 N-GN212fs  
GAAATTCAACTCCAGGCAGCAGTAGGGGAACTTCTCCTGCTAGAAATGGCT  
ggc aa  
TGGCGGTGATGCTGCTCTTGCTTTGCTGCTGCTTGACAGATTGAACCAGCT

21538 3 2 0 3 ORF1b-V2691del  
AAGGTAGACTTATAATTAGAGAAAACAACAGAGTTGTTATTTCTAGTGAT  
gtt  
CTTGTTAACAATAAACGAACAATGTTTGTTTTCTTGTTTTATTGCCACT

25650 3 2 0 3 ORF3a-L86del  
CAACTAGCACTCTCCAAGGGTGTTCACTTTGTTTGCAACTTGCTGTTGTT  
gtt  
TGTAACAGTTTACTCACACCTTTTGCTCGTTGCTGCTGGCCTTGAAGCCCC

21543 1 2 0 3 ORF1b-L2692fs  
AGACTTATAATTAGAGAAAACAACAGAGTTGTTATTTCTAGTGATGTTCT  
t  
GTTAACAATAAACGAACAATGTTTGTTTTCTTGTTTTATTGCCACTAGT

21775 1 2 0 3 S-S71fs  
TTCTTACCTTTCTTTTCCAATGTTACTTGGTTCCATGCTATACATGTCTC  
t  
GGGACCAATGGTACTAAGAGGTTTGATAACCCTGTCCTACCATTTAATGAT

28094 1 2 0 3 ORF8-S67fs  
GCTAGAAAATCAGCACCTTTAATTGAATTGTGCGTGGATGAGGCTGGTTC  
t  
AAATCACCCATTTCAGTACATCGATATCGGTAATTATACAGTTTCCTGTTTA

28257 1 2 0 3 ORF8-\*122fs  
ATGAAGACTTTTTAGAGTATCATGACGTTTCGTGTTGTTTTAGATTTTCATC  
t  
AAACGAACAACTAAAATGTCTGATAATGGACCCCAAAATCAGCGAAATGC

29772 1 2 0 3  
CACATTTTCACCGAGGCCACGCGGAGTACGATCGAGTGTACAGTGAACAA  
t  
GCTAGGGAGAGCTGCCTATATGGAAGAGCCCTAATGTGTAAAATTAATTTT

27299 2 2 0 3 ORF6-I33fs  
AATTATTATGAGGACTTTTAAAGTTTCCATTTGGAATCTTGATTACATCA  
ta  
AACCTCATAATTAAAAATTTATCTAAGTCACTAACTGAGAATAAATATTCT

27570 2 2 0 3 ORF7a-F59fs  
AATTCACCATTTTCATCCTCTAGCTGATAACAAATTTGCACTGACTTGCTT  
ta  
GCACTCAATTTGCTTTTGCTTGTCTGACGGCGTAAACACGTCTATCAGT

28063 2 2 0 3 ORF8-L57fs  
CTTCTATTCTAAATGGTATATTAGAGTAGGAGCTAGAAAATCAGCACCTT  
ta  
ATTGAATTGTGCGTGGATGAGGCTGGTTCTAAATCACCCATTTCAGTACATC

21864 3 2 0 3 S-I101del  
ACCATTTAATGATGGTGTATTATTTTGCTTCCACTGAGAAGTCTAACATAA  
taa  
GAGGCTGGATTTTTGGTACTACTTTAGATTCTGAAGACCCAGTCCCTACTTA

22192 6 2 0 3 S-NL211del  
TTTAAGAATATTGATGGTTATTTTAAAATATATTCTAAGCACACGCCTAT  
taa ttt  
AGTGCGTGATCTCCCTCAGGGTTTTTCGGCTTTAGAACCATTGGTAGATTT

27720 3 2 0 3 ORF7a-FI109L  
GTTCAAGAACTTTACTCTCCAATTTTTCTTATTGTTGCGGCAATAGTGTT  
tat  
AACACTTTGCTTCACACTCAAAAGAAAGACAGAATGATTGAACTTTCATTA

689 2 2 0 3 ORF1a-S142fs  
AGAACGGTAATAAAGGAGCTGGTGGCCATAGTTACGGCGCCGATCTAAAG  
tc  
ATTTGACTTAGGCGACGAGCTTGGCACTGATCCTTATGAAGATTTTCAAGA

224 3 2 0 3  
GTCTATCTTCTGCAGGCTGCTTACGGTTTCGTCCGTGTTGCAGCCGATCA  
tca  
GCACATCTAGGTTTCGTCCGGGTGTGACCGAAAGGTAAGATGGAGAGCCTT

21534 2 2 0 3 ORF1b-S2689fs  
AGTAAAGGTAGACTTATAATTAGAGAAAACAACAGAGTTGTTATTTCTAG  
tg  
ATGTTCTTGTTAACAACAACTAAACGAACAATGTTTGTTTTTCTTGTTTTATTG

28241 6 2 0 3 ORF8-VL117del  
GTGCGTTGTTCTGTTCTATGAAGACTTTTTAGAGTATCATGACGTTTCGTGT  
tgt ttt  
AGATTTTCATCTAAACGAACAACTAAAATGTCTGATAATGGACCCCAAAT

2586 3 2 0 3 ORF1a-V774del  
CTTGAAACTGGTGATTTACAACCATTAGAACAACCTACTAGTGAAGCTG  
ttg  
AAGCTCCATTGGTTGGTACACCAGTTTGTATTAACGGGCTTATGTTGCTCG

692 4 2 0 3 ORF1a-FD143fs  
ACGGTAATAAAGGAGCTGGTGGCCATAGTTACGGCGCCGATCTAAAGTCA  
ttt g  
ACTTAGGCGACGAGCTTGGCACTGATCCTTATGAAGATTTTCAAGAAAAC

28216 5 2 0 3 ORF8-FL108fs  
GGAACCTAAATTGGGTAGTCTTGTAGTGCGTTGTTTCGTTCTATGAAGACT  
ttt ta  
GAGTATCATGACGTTTCGTGTTGTTTTAGATTTCATCTAAACGAACAAACTA

27927 1 1 0 3 ORF8-T12fs  
GTCACGCCTAAACGAACATGAAATTTCTTGTTTTCTTAGGAATCATCACA  
a  
CTGTAGCTGCATTTACCAAGAATGTAGTTTACAGTCATGTACTCAACATC

28228 1 1 0 3 ORF8-H112fs  
GGGTAGTCTTGTAGTGCGTTGTTTCGTTCTATGAAGACTTTTTAGAGTATC  
a  
TGACGTTTCGTGTTGTTTTAGATTTCATCTAAACGAACAAACTAAAATGTCT

27763 6 1 0 3 ORF7b-ELS3A  
TAGTGTTTATAACACTTTGCTTCACACTCAAAGAAAGACAGAATGATTG  
aac ttt  
CATTAATTGACTTCTATTTGTGCTTTTTAGCCTTTCTGCTATTCCTTGTTT

28910 6 1 0 3 N-NG213del  
ATTCAACTCCAGGCAGCAGTAGGGGAACCTTCTCCTGCTAGAATGGCTGGC  
aat ggc  
GGTGATGCTGCTCTTGCTTTGCTGCTTGACAGATTGAACCAGCTTGAG

29731 2 1 0 3  
TTAATCAGTGTGTAACATTAGGGAGGACTTGAAAGAGCCACCACATTTTC  
ac  
CGAGGCCACGCGGAGTACGATCGAGTGTACAGTGAACAATGCTAGGGAGAG

28231 3 1 0 3 ORF8-D113del  
TAGTCTTG TAGTGCGTTGTTTCGTTCTATGAAGACTTTTTAGAGTATCATG  
acg  
TTCGTGTTGTTTTAGATTTCATCTAAACGAACAAACTAAAATGTCTGATAA

27574 3 1 0 3 ORF7a-T61del  
CACCATTTATCCTCTAGCTGATAACAAATTTGCACTGACTTGCTTTAGC  
act  
CAATTTGCTTTTGCTTGTCCTGACGGCGTAAAACACGTCTATCAGTTACGT

27571 2 1 0 3 ORF7a-S60fs  
ATTCACCATTTATCCTCTAGCTGATAACAAATTTGCACTGACTTGCTTT  
ag  
CACTCAATTTGCTTTTGCTTGTCCTGACGGCGTAAAACACGTCTATCAGTT

28190 2 1 0 3 ORF8-V99fs  
TGTTTACCTTTTACAATTAATTGCCAGGAACCTAAATTGGGTAGTCTTGT  
ag



TGCGTTGTTTCGTTCTATGAAGACTTTTTAGAGTATCATGACGTTTCGTGTTG

29763 2 1 0 3  
AAGAGCCACCACATTTTCACCGAGGCCACGCGGAGTACGATCGAGTGTAC  
ag  
TGAACAATGCTAGGGAGAGCTGCCTATATGGAAGAGCCCTAATGTGTAAAA

29756 6 1 0 3  
GACTTGAAAGAGCCACCACATTTTCACCGAGGCCACGCGGAGTACGATCG  
agt gta  
CAGTGAACAATGCTAGGGAGAGCTGCCTATATGGAAGAGCCCTAATGTGTA

1850 3 1 0 3 ORF1a-I529del  
CAAAAGGAAAAGCTAAAAAAGGTGCCTGGAATATTGGTGAACAGAAATCA  
ata  
CTGAGTCCTCTTTATGCATTTGCATCAGAGGCTGCTCGTGTGTGTACGATCA

27403 3 1 0 3 ORF7a-I4del  
AATTAGATGAAGAGCAACCAATGGAGATTGATTAAACGAACATGAAAATT  
att  
CTTTTCTTGGCACTGATAACACTCGCTACTTGTGAGCTTTATCACTACCAA

8568 3 1 0 3 ORF1a-NW2768R  
TAATGTTGTAACAACAAAGATAGCACTTAAGGGTGGTAAAATTGTTAATA  
att  
GGTTGAAGCAGTTAATTAAAGTTACACTTGTGTTTCCTTTTTGTTGCTGCTA

27700 4 1 0 3 ORF7a-IV103fs  
TGTTTCATCAGACAAGAGGAAGTTCAAGAACTTTACTCTCCAATTTTTCTT  
att g  
TTGCGGCAATAGTGTTTATAACACTTTGCTTCACACTCAAAAGAAAGACAG

27552 4 1 0 3 ORF7a-KF53fs  
TCTGGAACATACGAGGGCAATTCACCATTTTCATCCTCTAGCTGATAACAA  
att t  
GCACTGACTTGCTTTAGCACTCAATTTGCTTTTGCTTGTCTGACGGCGTA

29725 5 1 0 3  
CAATCTTTAATCAGTGTGTAAACATTAGGGAGGACTTGAAAGAGCCACCAC  
att tt  
CACCGAGGCCACGCGGAGTACGATCGAGTGTACAGTGAACAATGCTAGGGA

25350 1 1 0 3 S-P1263fs  
CTGTTGTTCTTGTGGATCCTGCTGCAAATTTGATGAAGACGACTCTGAGC  
c  
AGTGCTCAAAGGAGTCAAATTACATTACACATAAACGAACTTATGGATTG

28201 1 1 0 3 ORF8-S103fs  
TACAATTAATTGCCAGGAACCTAAATTGGGTAGTCTTGTAGTGCGTTGTT  
c  
GTTCTATGAAGACTTTTTAGAGTATCATGACGTTTCGTGTTGTTTTAGATTT

29686 1 1 0 3  
ATAGCACAAGTAGATGTAGTTAACTTTAATCTCACATAGCAATCTTTAAT

c  
AGTGTGTAACATTAGGGAGGACTTGAAAGAGCCACCACATTTTCACCGAGG

27577 2 1 0 3 ORF7a-Q62fs  
CATTTTCATCCTCTAGCTGATAACAAATTTGCACTGACTTGCTTTAGCACT  
ca  
ATTTGCTTTTGTCTTGTCTGACGGCGTAAAACACGTCTATCAGTTACGTGC

29732 3 1 0 3  
TAATCAGTGTGTAACATTAGGGAGGACTTGAAAGAGCCACCACATTTTCA  
ccg  
AGGCCACGCGGAGTACGATCGAGTGTACAGTGAACAATGCTAGGGAGAGCT

29754 6 1 0 3  
AGGACTTGAAAGAGCCACCACATTTTCACCGAGGCCACGCGGAGTACGAT  
cga gtg  
TACAGTGAACAATGCTAGGGAGAGCTGCCTATATGGAAGAGCCCTAATGTG

28171 4 1 0 3 ORF8-PK93fs  
CGGTAATTATACAGTTTCCTGTTTACCTTTTACAATTAATTGCCAGGAAC  
cta a  
ATTGGGTAGTCTTGTAGTGCGTTGTTTCGTTCTATGAAGACTTTTTAGAGTA

29774 5 1 0 3  
CATTTTCACCGAGGCCACGCGGAGTACGATCGAGTGTACAGTGAACAATG  
cta gg  
GAGAGCTGCCTATATGGAAGAGCCCTAATGTGTAAAATTAATTTTAGTAGT

28205 4 1 0 3 ORF8-FY104fs  
ATTAATTGCCAGGAACCTAAATTGGGTAGTCTTGTAGTGCGTTGTTTCGTT  
cta t  
GAAGACTTTTTAGAGTATCATGACGTTTCGTGTTGTTTTAGATTTTCATCTAA

27684 6 1 0 3 ORF7a-YSP97\*  
TCAGTTTCACCTAAACTGTTTCATCAGACAAGAGGAAGTTCAAGAACTTTA  
ctc tcc  
AATTTTTCTTATTGTTGCGGCAATAGTGTTTATAACACTTTGCTTCACACT

28139 6 1 0 3 ORF8-CL83del  
GGTTCTAAATCACCCATTTCAGTACATCGATATCGGTAATTATACAGTTTC  
ctg ttt  
ACCTTTTACAATTAATTGCCAGGAACCTAAATTGGGTAGTCTTGTAGTGCG

26493 1 1 0 3  
TCTTCTAGAGTTCCTGATCTTCTGGTCTAAACGAACTAAATATTATATTA  
g  
TTTTTCTGTTTGGAACCTTTAATTTTAGCCATGGCAGATTCCAACGGTACTA

28193 1 1 0 3 ORF8-V100fs  
TTACCTTTTACAATTAATTGCCAGGAACCTAAATTGGGTAGTCTTGTAGT  
g  
CGTTGTTCGTTCTATGAAGACTTTTTAGAGTATCATGACGTTTCGTGTTGTT

29766 5 1 0 3

AGCCACCACATTTTCACCGAGGCCACGCGGAGTACGATCGAGTGTACAGT  
gaa ca  
ATGCTAGGGAGAGCTGCCTATATGGAAGAGCCCTAATGTGTAAAATTAATT

3800 3 1 0 3 ORF1a-D1179del  
TAAGAGTTTGTGTAGATACTGTTTCGCACAAATGTCTACTTAGCTGTCTTT  
gat  
AAAAATCTCTATGACAAACTTGTTTCAAGCTTTTTGGAAATGAAGAGTGAA

29717 3 1 0 3  
TCACATAGCAATCTTTAATCAGTGTGTAACATTAGGGAGGACTTGAAAGA  
gcc  
ACCACATTTTCACCGAGGCCACGCGGAGTACGATCGAGTGTACAGTGAACA

27798 5 1 0 3 ORF7b-AF15fs  
AAGACAGAATGATTGAACTTTCATTAATTGACTTCTATTTGTGCTTTTTA  
gcc tt  
TCTGCTATTCCTTGTTTTAATTATGCTTATTATCTTTTGGTTCTCACTTGA

27589 5 1 0 3 ORF7a-AC66fs  
TAGCTGATAACAAATTTGCACTGACTTGCTTTAGCACTCAATTTGCTTTT  
gct tg  
TCCTGACGGCGTAAAACACGTCTATCAGTTACGTGCCAGATCAGTTTCACC

28179 3 1 0 3 ORF8-G96del  
ATACAGTTTCCTGTTTACCTTTTACAATTAATTGCCAGGAACCTAAATTG  
ggt  
AGTCTTGTAGTGCGTTGTTCGTTCTATGAAGACTTTTTAGAGTATCATGAC

28183 2 1 0 3 ORF8-S97fs  
AGTTTCCTGTTTACCTTTTACAATTAATTGCCAGGAACCTAAATTGGGTA  
gt  
CTTGTAGTGCGTTGTTCGTTCTATGAAGACTTTTTAGAGTATCATGACGTT

22113 3 1 0 3 S-GN184D  
TTTTGAATATGTCTCTCAGCCTTTTCTTATGGACCTTGAAGGAAAACAGG  
gta  
ATTTCAAAAATCTTAGGGAATTTGTGTTTAAGAATATTGATGGTTATTTTA

28223 3 1 0 3 ORF8-EY110D  
AAATTGGGTAGTCTTGTAGTGCGTTGTTCGTTCTATGAAGACTTTTTAGA  
gta  
TCATGACGTTTCGTGTTGTTTTAGATTTTCATCTAAACGAACAACTAAAATG

27604 6 1 0 3 ORF7a-VK71del  
TTGCACTGACTTGCTTTAGCACTCAATTTGCTTTTGCTTGTCTGACGGC  
gta aaa  
CACGTCTATCAGTTACGTGCCAGATCAGTTTCACCTAAACTGTTTCATCAGA

9854 6 1 0 3 ORF1a-VL3197del  
TGTGCACCTTTTTGTAAATAAAGAAATGTATCTAAAGTTGCGTAGTGAT  
gtg cta  
TTACCTCTTACGCAATATAATAGATACTTAGCTCTTTATAATAAGTACAAG

28177 1 1 0 3 ORF8-L95fs  
TTATACAGTTTCCTGTTTACCTTTTACAATTAATTGCCAGGAACCTAAAT  
t  
GGGTAGTCTTGTAGTGCGTTGTTTCGTTCTATGAAGACTTTTTAGAGTATCA

28197 1 1 0 3 ORF8-C102fs  
CTTTTACAATTAATTGCCAGGAACCTAAATTGGGTAGTCTTGTAGTGCGT  
t  
GTTTCGTTCTATGAAGACTTTTTAGAGTATCATGACGTTTCGTGTTGTTTTAG

27968 2 1 0 3 ORF8-C25fs  
ATCATCACAACCTGTAGCTGCATTTACCAAGAATGTAGTTTACAGTCATG  
ta  
CTCAACATCAACCATATGTAGTTGATGACCCGTGTCCTATTCACCTTCTATT

27672 5 1 0 3 ORF7a-VQ93fs  
TTACGTGCCAGATCAGTTTCACCTAAACTGTTTCATCAGACAAGAGGAAGT  
tca ag  
AACTTTACTCTCCAATTTTTCTTATTGTTGCGGCAATAGTGTTTATAACAC

28067 6 1 0 3 ORF8-IEL58M  
TATTCTAAATGGTATATTAGAGTAGGAGCTAGAAAATCAGCACCTTTAAT  
tga att  
GTGCGTGGATGAGGCTGGTTCTAAATCACCCATTCAGTACATCGATATCGG

11271 6 1 0 3 ORF1a-MVD3669N  
GGTCTATATGCCTGCTAGTTGGGTGATGCGTATTATGACATGGTTGGATA  
tgg ttg  
ATACTAGTTTGTCTGGTTTTAAGCTAAAAGACTGTGTTATGTATGCATCAG

28186 2 1 0 3 ORF8-L98fs  
TTCCTGTTTACCTTTTACAATTAATTGCCAGGAACCTAAATTGGGTAGTC  
tt  
GTAGTGCGTTGTTTCGTTCTATGAAGACTTTTTAGAGTATCATGACGTTTCGT

27771 3 1 0 3 ORF7b-L6del  
ATAACACTTTGCTTCACACTCAAAGAAAGACAGAATGATTGAACTTTCA  
tta  
ATTGACTTCTATTTGTGCTTTTTAGCCTTTCTGCTATTCCTTGTTTTAATT

28091 6 1 0 3 ORF8-KS68del  
GGAGCTAGAAAATCAGCACCTTTAATTGAATTGTGCGTGGATGAGGCTGG  
ttc taa  
ATCACCCATTCAGTACATCGATATCGGTAATTATACAGTTTCCTGTTTACC
