# Supplementary material for: Deletions across the SARS-CoV-2 Genome: Molecular Mechanisms and Putative Functional Consequences of Deletions in Accessory Genes
Source: MDPI journal article supplement (doi:10.3390/microorganisms11010229), 2023-01-16
Supplement: s1 [file s1]

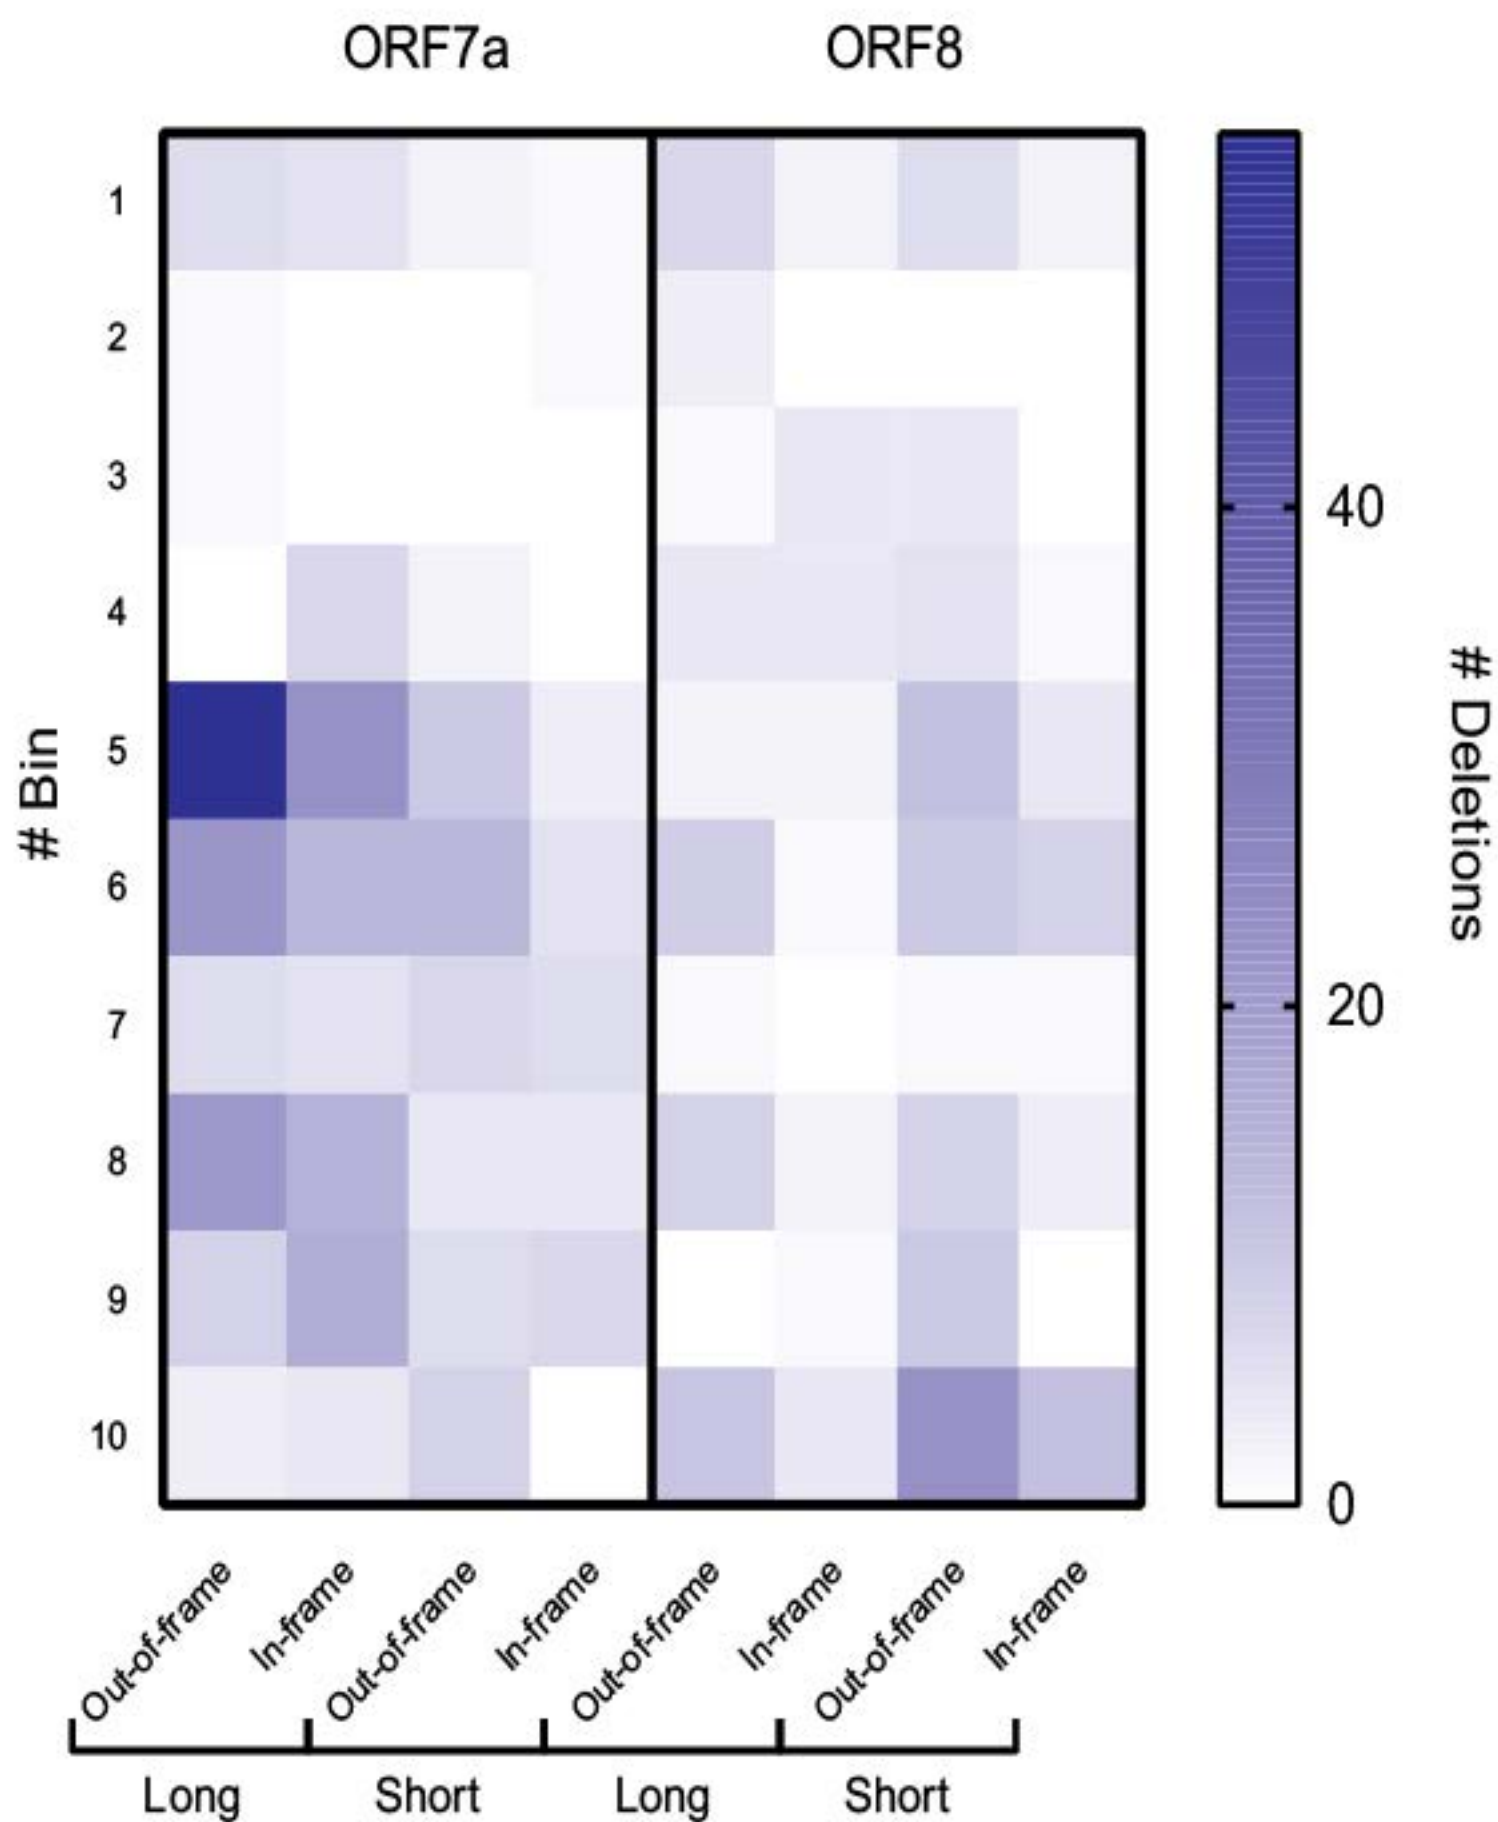

**Figure S7.** Heatmap of the distribution of in- and out-of-frame deletions in UTR and CDS for each bin (1 to 10), according to their length (Short and long).
