# Supplementary material for: Deletions across the SARS-CoV-2 Genome: Molecular Mechanisms and Putative Functional Consequences of Deletions in Accessory Genes
Source: MDPI journal article supplement (doi:10.3390/microorganisms11010229), 2023-01-16
Supplement: s1 [file s1]

Supplementary Figure S3. Contexts of long deletions in the bin #5 of ORF7a.  
The 1st number is the position and the 5th number is the number of instances  
followed by gene names.

27570 13 4 2 54 ORF7a-FSTQF59fs  
AATTCACCATTTTCATCCTCTAGCTGATAACAAATTTGCACTGACTTGCTT  
tag cac tca a  
GCTTTTGCTTGTCTGACGGCGTAAACACGTCTATCAGTTACGTGCCAGA

27569 55 2 1 90 ORF7a-FSTQFAFACPDGVKHVYQL59fs  
CAATTCACCATTTTCATCCTCTAGCTGATAACAAATTTGCACTGACTTGCT  
tta gca ctc aat ttg ctt ttg ctt gtc ctg acg gcg taa aac  
ACGTGCCAGATCAGTTTCACCTAAACTGTTTCATCAGACAAGAGGAAGTTCA

GGAACATACGAGGGCAATTCACCATTTTCATCCTCTAGCTGATAACAAATT  
tgc act gac ttg ctt tag cac tca att tgc ttt tgc ttg tcc tga cgg cgt a  
ACGTGCCAGATCAGTTTCACCTAAACTGTTTCATCAGACAAGAGGAAGTTCA

27555 92 13 0 200 ORF7a-FALTCFSTQFAFACPDGVKHVYQLRARSVSP54fs  
GGAACATACGAGGGCAATTCACCATTTTCATCCTCTAGCTGATAACAAATT  
tgc act gac ttg ctt tag cac tca att tgc ttt tgc ttg tcc tga cgg cgt aaa aca cgt cta tca gtt  
AACTGTTTCATCAGACAAGAGGAAGTTCAAGAAGTTTACTCTCCAATTTTTC

27571 16 5 0 97 ORF7a-STQFAF60fs  
ATTCACCATTTTCATCCTCTAGCTGATAACAAATTTGCACTGACTTGCTTT  
agc act caa ttt  
TTGCTTGTCTGACGGCGTAAACACGTCTATCAGTTACGTGCCAGATCAG

27575 23 1 0 59 ORF7a-TQFAFACP61fs  
ACCATTTTCATCCTCTAGCTGATAACAAATTTGCACTGACTTGCTTTAGCA  
ctc aat ttg ctt ttg ctt  
GACGGCGTAAACACGTCTATCAGTTACGTGCCAGATCAGTTTCACCTAAA

27555 52 3 0 54 ORF7a-FALTCFSTQFAFACPDGV54fs  
GGAACATACGAGGGCAATTCACCATTTTCATCCTCTAGCTGATAACAAATT  
tgc act gac ttg ctt tag cac tca att tgc ttt tgc ttg  
AAACACGTCTATCAGTTACGTGCCAGATCAGTTTCACCTAAACTGTTTCATC

ATTCACCATTTTCATCCTCTAGCTGATAACAAATTTGCACTGACTTGCTTT  
agc act caa ttt gc  
GCTTGTCTGACGGCGTAAACACGTCTATCAGTTACGTGCCAGATCAGTT

27574 17 2 0 46 ORF7a-TQFAFA61fs  
CACCATTTTCATCCTCTAGCTGATAACAAATTTGCACTGACTTGCTTTAGC  
act caa ttt gct t  
TTGTCCTGACGGCGTAAACACGTCTATCAGTTACGTGCCAGATCAGTTTC

27561 16 2 0 42 ORF7a-LTCFST56fs  
TACGAGGGCAATTCACCATTTTCATCCTCTAGCTGATAACAAATTTGCACT  
gac ttg ctt tag  
CAATTTGCTTTTGCTTGTCTGACGGCGTAAACACGTCTATCAGTTACGT

27566 28 4 0 41 ORF7a-CFSTQFAFAC58fs  
GGGCAATTCACCATTTTCATCCTCTAGCTGATAACAAATTTGCACTGACTT  
gct tta gca ctc aat ttg ctt  
TCCTGACGGCGTAAAACACGTCTATCAGTTACGTGCCAGATCAGTTTCACC

27554 92 2 0 41 ORF7a-FALTCFSTQFAFACPDGVKHVYQLRARSVSP54fs  
TGGAACATACGAGGGCAATTCACCATTTTCATCCTCTAGCTGATAACAAAT  
ttg cac tga ctt gct tta gca ctc aat ttg ctt ttg ctt gtc ctg acg gcg taa aac acg tct atc agt  
AAACTGTTTCATCAGACAAGAGGAAGTTCAAGAACTTTACTCTCCAATTTTT

GGAACATACGAGGGCAATTCACCATTTTCATCCTCTAGCTGATAACAAATT  
tgc act gac ttg ctt tag cac tca att tgc ttt tgc ttg  
AAAACACGTCTATCAGTTACGTGCCAGATCAGTTTCACCTAAACTGTTTCAT

GGAACATACGAGGGCAATTCACCATTTTCATCCTCTAGCTGATAACAAATT  
tgc act gac ttg ctt tag  
ATTTGCTTTTGCTTGTCCTGACGGCGTAAAACACGTCTATCAGTTACGTGC

27570 19 1 0 36 ORF7a-FSTQFAF59fs  
AATTCACCATTTTCATCCTCTAGCTGATAACAAATTTGCACTGACTTGCTT  
tag cac tca att tgc  
GCTTGTCCTGACGGCGTAAAACACGTCTATCAGTTACGTGCCAGATCAGTT

27556 67 2 0 23 ORF7a-ALTCFSTQFAFACPDGVKHVYQL55fs  
GAACATACGAGGGCAATTCACCATTTTCATCCTCTAGCTGATAACAAATTT  
gca ctg act tgc ttt agc act caa ttt gct ttt gct tgt cct gac ggc gta  
TACGTGCCAGATCAGTTTCACCTAAACTGTTTCATCAGACAAGAGGAAGTTC

27571 17 13 0 22 ORF7a-STQFAF60fs  
ATTCACCATTTTCATCCTCTAGCTGATAACAAATTTGCACTGACTTGCTTT  
agc act caa ttt g  
TGCTTGTCCTGACGGCGTAAAACACGTCTATCAGTTACGTGCCAGATCAGT

27555 44 3 0 22 ORF7a-FALTCFSTQFAFACP54fs  
GGAACATACGAGGGCAATTCACCATTTTCATCCTCTAGCTGATAACAAATT  
tgc act gac ttg ctt tag cac tca att tgc ttt  
ACGGCGTAAAACACGTCTATCAGTTACGTGCCAGATCAGTTTCACCTAAAC

27556 85 9 0 20 ORF7a-ALTCFSTQFAFACPDGVKHVYQLRARSVS55fs  
GAACATACGAGGGCAATTCACCATTTTCATCCTCTAGCTGATAACAAATTT  
gca ctg act tgc ttt agc act caa ttt gct ttt gct tgt cct gac ggc gta aaa cac gtc tat c  
CACCTAAACTGTTTCATCAGACAAGAGGAAGTTCAAGAACTTTACTCTCCAA

27572 53 5 0 19 ORF7a-STQFAFACPDGVKHVYQL60fs  
TTCACCATTTTCATCCTCTAGCTGATAACAAATTTGCACTGACTTGCTTTA  
gca ctc aat ttg ctt ttg ctt gtc ctg acg gcg taa aac a  
CGTGCCAGATCAGTTTCACCTAAACTGTTTCATCAGACAAGAGGAAGTTCAA

27555 82 4 0 14 ORF7a-FALTCFSTQFAFACPDGVKHVYQLRARS54fs  
GGAACATACGAGGGCAATTCACCATTTTCATCCTCTAGCTGATAACAAATT  
tgc act gac ttg ctt tag cac tca att tgc ttt tgc ttg tcc tga cgg cgt aaa aca cgt ct  
GTTTCACCTAAACTGTTTCATCAGACAAGAGGAAGTTCAAGAACTTTACTCT

27572 71 3 0 14 ORF7a-STQFAFACPDGVKHVYQLRARSVS60fs

TTCACCATTTCATCCTCTAGCTGATAACAAATTTGCACTGACTTGCTTTA  
gca ctc aat ttg ctt ttg ctt gtc ctg acg gcg taa aac acg tct atc agt tac  
CCTAAACTGTTTCATCAGACAAGAGGAAGTTCAAGAACTTTACTCTCCAATT

27572 7 4 0 11 ORF7a-STQ60fs  
TTCACCATTTCATCCTCTAGCTGATAACAAATTTGCACTGACTTGCTTTA  
gca ctc  
ATTTGCTTTTGCTTGCTGACGGCGTAAACACGTCTATCAGTTACGTGC

27570 55 2 0 11 ORF7a-FSTQFAFACPDGVKHVYQL59fs  
AATTCACCATTTCATCCTCTAGCTGATAACAAATTTGCACTGACTTGCTT  
tag cac tca att tgc ttt tgc ttg tcc tga cgg cgt aaa aca  
CGTGCCAGATCAGTTTCACCTAAACTGTTTCATCAGACAAGAGGAAGTTCAA

27548 7 3 0 10 ORF7a-NKF52fs  
CTCTTCTGGAACATACGAGGGCAATTCACCATTTCATCCTCTAGCTGATA  
aca aat  
TGCACTGACTTGCTTTAGCACTCAATTTGCTTTTGCTTGCTGACGGCGT

27562 79 3 0 10 ORF7a-TCFSTQFAFACPDGVKHVYQLRARSVS57fs  
ACGAGGGCAATTCACCATTTCATCCTCTAGCTGATAACAAATTTGCACTG  
act tgc ttt agc act caa ttt gct ttt gct tgt cct gac ggc gta aaa cac gtc tat cag  
CACCTAAACTGTTTCATCAGACAAGAGGAAGTTCAAGAACTTTACTCTCCAA

GAACATACGAGGGCAATTCACCATTTCATCCTCTAGCTGATAACAAATTT  
gca ctg act tgc ttt agc act caa ttt gct ttt gct tgt cct gac ggc  
CAGTTACGTGCCAGATCAGTTTCACCTAAACTGTTTCATCAGACAAGAGGAA

27566 13 1 0 10 ORF7a-CFSTQ58fs  
GGGCAATTCACCATTTCATCCTCTAGCTGATAACAAATTTGCACTGACTT  
gct tta gca c  
ATTTGCTTTTGCTTGCTGACGGCGTAAACACGTCTATCAGTTACGTGC

27572 8 4 0 9 ORF7a-STQ60fs  
TTCACCATTTCATCCTCTAGCTGATAACAAATTTGCACTGACTTGCTTTA  
gca ctc  
TTTGCTTTTGCTTGCTGACGGCGTAAACACGTCTATCAGTTACGTGCC

27566 65 2 0 9 ORF7a-CFSTQFAFACPDGVKHVYQLRA58fs  
GGGCAATTCACCATTTCATCCTCTAGCTGATAACAAATTTGCACTGACTT  
gct tta gca ctc aat ttg ctt ttg ctt gtc ctg acg gcg taa aac acg t  
AGATCAGTTTCACCTAAACTGTTTCATCAGACAAGAGGAAGTTCAAGAACTT

27566 76 1 0 9 ORF7a-CFSTQFAFACPDGVKHVYQLRARSVS58fs  
GGGCAATTCACCATTTCATCCTCTAGCTGATAACAAATTTGCACTGACTT  
gct tta gca ctc aat ttg ctt ttg ctt gtc ctg acg gcg taa aac acg tct atc agt  
ACCTAAACTGTTTCATCAGACAAGAGGAAGTTCAAGAACTTTACTCTCCAAT

27555 91 1 0 9 ORF7a-FALTCFSTQFAFACPDGVKHVYQLRARSVSP54fs  
GGAACATACGAGGGCAATTCACCATTTCATCCTCTAGCTGATAACAAATT  
tgc act gac ttg ctt tag cac tca att tgc ttt tgc ttg tcc tga cgg cgt aaa aca cgt cta tca gtt  
AAACTGTTTCATCAGACAAGAGGAAGTTCAAGAACTTTACTCTCCAATTTT

27571 11 5 0 8 ORF7a-STQF60fs

ATTCACCATTTTCATCCTCTAGCTGATAACAAATTTGCACTGACTTGCTTT  
agc act caa  
TGCTTTTGCTTGTCCTGACGGCGTAAAACACGTCTATCAGTTACGTGCCAG

27549 115 1 0 8 ORF7a-NKFALTCFSTQFAFACPDGVKHHVYQLRARSVSPKLFIRQ52fs  
TCTTCTGGAACATACGAGGGCAATTCACCATTTTCATCCTCTAGCTGATAA  
caa att tgc act gac ttg ctt tag cac tca att tgc ttt tgc ttg tcc tga cgg cgt aaa aca cgt cta tca gtt acg tgc cag atc  
GAGGAAGTTCAAGAACTTTACTCTCCAATTTTCTTATTGTTGCGGCAATA

GGCAATTCACCATTTTCATCCTCTAGCTGATAACAAATTTGCACTGACTTG  
ctt tag cac tca att tgc ttt  
TCCTGACGGCGTAAAACACGTCTATCAGTTACGTGCCAGATCAGTTTCACC

CACCATTTTCATCCTCTAGCTGATAACAAATTTGCACTGACTTGCTTTAGC  
act caa ttt gct ttt gct tgt cc  
GTAAAACACGTCTATCAGTTACGTGCCAGATCAGTTTCACCTAAACTGTTC

27573 49 2 0 6 ORF7a-STQFAFACPDGVKHHVYQ60fs  
TCACCATTTTCATCCTCTAGCTGATAACAAATTTGCACTGACTTGCTTTAG  
cac tca att tgc ttt tgc ttg tcc tga cgg cgt aaa a  
TTACGTGCCAGATCAGTTTCACCTAAACTGTTCATCAGACAAGAGGAAGTT

GAACATACGAGGGCAATTCACCATTTTCATCCTCTAGCTGATAACAAATTT  
gca ctg act tgc ttt agc act caa ttt gct ttt gct tgt cct gac ggc gta aaa cac gtc tat  
TCACCTAAACTGTTCATCAGACAAGAGGAAGTTCAAGAACTTTACTCTCCA

27570 71 2 0 6 ORF7a-FSTQFAFACPDGVKHHVYQLRARSV59fs  
AATTCACCATTTTCATCCTCTAGCTGATAACAAATTTGCACTGACTTGCTT  
tag cac tca att tgc ttt tgc ttg tcc tga cgg cgt aaa aca cgt cta tca gtt  
CACCTAAACTGTTCATCAGACAAGAGGAAGTTCAAGAACTTTACTCTCCAA

27572 10 3 0 5 ORF7a-STQF60fs  
TTCACCATTTTCATCCTCTAGCTGATAACAAATTTGCACTGACTTGCTTTA  
gca ctc aa  
TGCTTTTGCTTGTCCTGACGGCGTAAAACACGTCTATCAGTTACGTGCCAG

27549 31 2 0 5 ORF7a-NKFALTCFSTQ52fs  
TCTTCTGGAACATACGAGGGCAATTCACCATTTTCATCCTCTAGCTGATAA  
caa att tgc act gac ttg ctt tag  
TTTGCTTTTGCTTGTCCTGACGGCGTAAAACACGTCTATCAGTTACGTGCC

27556 64 1 0 5 ORF7a-ALTCFSTQFAFACPDGVKHHVYQ55fs  
GAACATACGAGGGCAATTCACCATTTTCATCCTCTAGCTGATAACAAATTT  
gca ctg act tgc ttt agc act caa ttt gct ttt gct tgt cct gac ggc  
AGTTACGTGCCAGATCAGTTTCACCTAAACTGTTCATCAGACAAGAGGAAG

27566 64 1 0 5 ORF7a-CFSTQFAFACPDGVKHHVYQLRA58fs  
GGGCAATTCACCATTTTCATCCTCTAGCTGATAACAAATTTGCACTGACTT  
gct tta gca ctc aat ttg ctt ttg ctt gtc ctg acg gcg taa aac acg  
CAGATCAGTTTCACCTAAACTGTTCATCAGACAAGAGGAAGTTCAAGAACT

27571 10 3 0 4 ORF7a-STQF60fs  
ATTCACCATTTTCATCCTCTAGCTGATAACAAATTTGCACTGACTTGCTTT  
agc act ca

TTGCTTTTGCTTGTCTGACGGCGTAAAACACGTCTATCAGTTACGTGCCA

27566 58 3 0 4 ORF7a-CFSTQFAFACPDGVKHVYQL58fs  
GGGCAATTCACCATTTTCATCCTCTAGCTGATAACAAATTTGCACTGACTT  
gct tta gca ctc aat ttg ctt ttg ctt gtc ctg acg gcg taa aa  
ACGTGCCAGATCAGTTTCACCTAAACTGTTTCATCAGACAAGAGGAAGTTCA

27556 23 2 0 4 ORF7a-ALTCFSTQ55fs  
GAACATACGAGGGCAATTCACCATTTTCATCCTCTAGCTGATAACAAATTT  
gca ctg act tgc ttt agc  
ATTTGCTTTTGCTTGTCTGACGGCGTAAAACACGTCTATCAGTTACGTGC

27556 32 2 0 4 ORF7a-ALTCFSTQFAF55fs  
GAACATACGAGGGCAATTCACCATTTTCATCCTCTAGCTGATAACAAATTT  
gca ctg act tgc ttt agc act caa  
TGCTTGTCTGACGGCGTAAAACACGTCTATCAGTTACGTGCCAGATCAGT

27555 70 2 0 4 ORF7a-FALTCFSTQFAFACPDGVKHVYQL54fs  
GGAACATACGAGGGCAATTCACCATTTTCATCCTCTAGCTGATAACAAATT  
tgc act gac ttg ctt tag cac tca att tgc ttt tgc ttg tcc tga cgg cgt aa  
CGTGCCAGATCAGTTTCACCTAAACTGTTTCATCAGACAAGAGGAAGTTCAA

27559 88 1 0 4 ORF7a-LTCFSTQFAFACPDGVKHVYQLRARSVSPK56fs  
CATACGAGGGCAATTCACCATTTTCATCCTCTAGCTGATAACAAATTTGCA  
ctg act tgc ttt agc act caa ttt gct ttt gct tgt cct gac ggc gta aaa cac gtc tat cag tta  
AACTGTTTCATCAGACAAGAGGAAGTTCAAGAAGTTTACTCTCCAATTTTTC

27566 16 1 0 4 ORF7a-CFSTQF58fs  
GGGCAATTCACCATTTTCATCCTCTAGCTGATAACAAATTTGCACTGACTT  
gct tta gca ctc  
TGCTTTTGCTTGTCTGACGGCGTAAAACACGTCTATCAGTTACGTGCCAG

27553 56 1 0 4 ORF7a-FALTCFSTQFAFACPDGVK54fs  
CTGGAACATACGAGGGCAATTCACCATTTTCATCCTCTAGCTGATAACAAA  
ttt gca ctg act tgc ttt agc act caa ttt gct ttt gct tgt  
ACACGTCTATCAGTTACGTGCCAGATCAGTTTCACCTAAACTGTTTCATCAG

TTCACCATTTTCATCCTCTAGCTGATAACAAATTTGCACTGACTTGCTTTA  
gca ctc aat ttg  
TTGCTTGTCTGACGGCGTAAAACACGTCTATCAGTTACGTGCCAGATCAG

27548 8 2 0 3 ORF7a-NKF52fs  
CTCTTCTGGAACATACGAGGGCAATTCACCATTTTCATCCTCTAGCTGATA  
aca aat  
GCACTGACTTGCTTTAGCACTCAATTTGCTTTTGCTTGTCTGACGGCGTA

27574 11 2 0 3 ORF7a-TQFA61fs  
CACCATTTTCATCCTCTAGCTGATAACAAATTTGCACTGACTTGCTTTAGC  
act caa ttt  
TTTTGCTTGTCTGACGGCGTAAAACACGTCTATCAGTTACGTGCCAGATC

27575 43 2 0 3 ORF7a-TQFAFACPDGVKHVY61fs  
ACCATTTTCATCCTCTAGCTGATAACAAATTTGCACTGACTTGCTTTAGCA  
ctc aat ttg ctt ttg ctt gtc ctg acg gcg taa

TCAGTTACGTGCCAGATCAGTTTCACCTAAACTGTTTCATCAGACAAGAGGA

27566 8 2 0 3 ORF7a-CFS58fs  
GGGCAATTCACCATTTTCATCCTCTAGCTGATAACAAATTTGCACTGACTT  
gct tta  
ACTCAATTTGCTTTTGCTTGTCTGACGGCGTAAACACGTCTATCAGTTA

GGGCAATTCACCATTTTCATCCTCTAGCTGATAACAAATTTGCACTGACTT  
gct tta gca ctc aat ttg ctt ttg ctt gtc ctg acg gcg  
ATCAGTTACGTGCCAGATCAGTTTCACCTAAACTGTTTCATCAGACAAGAGG

27576 7 2 0 3 ORF7a-TQF61fs  
CCATTTTCATCCTCTAGCTGATAACAAATTTGCACTGACTTGCTTTAGCAC  
tca att  
GCTTTTGCTTGTCTGACGGCGTAAACACGTCTATCAGTTACGTGCCAGA

27576 50 2 0 3 ORF7a-TQFAFACPDGVKHHVYQL61fs  
CCATTTTCATCCTCTAGCTGATAACAAATTTGCACTGACTTGCTTTAGCAC  
tca att tgc ttt tgc ttg tcc tga cgg cgt aaa aca cg  
GTGCCAGATCAGTTTCACCTAAACTGTTTCATCAGACAAGAGGAAGTTCAAG

27555 86 2 0 3 ORF7a-FALTCTFSTQFAFACPDGVKHHVYQLRARSV54fs  
GGAACATACGAGGGCAATTCACCATTTTCATCCTCTAGCTGATAACAAATT  
tgc act gac ttg ctt tag cac tca att tgc ttt tgc ttg tcc tga cgg cgt aaa aca cgt cta tc  
CACCTAAACTGTTTCATCAGACAAGAGGAAGTTCAAGAACTTTACTCTCCAA

GGAACATACGAGGGCAATTCACCATTTTCATCCTCTAGCTGATAACAAATT  
tgc act gac ttg ctt tag cac tca att tgc ttt tgc ttg tcc tga cgg cgt aaa aca cgt cta tca  
ACCTAAACTGTTTCATCAGACAAGAGGAAGTTCAAGAACTTTACTCTCCAAT

27551 70 1 0 3 ORF7a-KFALTCTFSTQFAFACPDGVKHHVYQ53fs  
TTCTGGAACATACGAGGGCAATTCACCATTTTCATCCTCTAGCTGATAACA  
aat ttg cac tga ctt gct tta gca ctc aat ttg ctt ttg ctt gtc ctg acg gc  
GTTACGTGCCAGATCAGTTTCACCTAAACTGTTTCATCAGACAAGAGGAAGT

CTCTTCTGGAACATACGAGGGCAATTCACCATTTTCATCCTCTAGCTGATA  
aca aat ttg cac tga ctt gct tta gca ctc aat ttg ctt ttg ctt gtc ctg acg gcg taa aac acg tct atc agt tac gtg  
TCAGACAAGAGGAAGTTCAAGAACTTTACTCTCCAATTTTCTTATTGTTG

27558 92 1 0 3 ORF7a-ALTCTFSTQFAFACPDGVKHHVYQLRARSVSPK55fs  
ACATACGAGGGCAATTCACCATTTTCATCCTCTAGCTGATAACAAATTTGC  
act gac ttg ctt tag cac tca att tgc ttt tgc ttg tcc tga cgg cgt aaa aca cgt cta tca gtt acg  
TGTTTCATCAGACAAGAGGAAGTTCAAGAACTTTACTCTCCAATTTTCTTA

TTCACCATTTTCATCCTCTAGCTGATAACAAATTTGCACTGACTTGCTTTA  
gca ctc aat ttg ctt ttg ctt gtc ctg acg gcg taa  
AGTTACGTGCCAGATCAGTTTCACCTAAACTGTTTCATCAGACAAGAGGAAG

27556 43 1 0 3 ORF7a-ALTCTFSTQFAFACPD55fs  
GAACATACGAGGGCAATTCACCATTTTCATCCTCTAGCTGATAACAAATTT  
gca ctg act tgc ttt agc act caa ttt gct ttt  
ACGGCGTAAACACGTCTATCAGTTACGTGCCAGATCAGTTTCACCTAAAC

27566 59 1 0 3 ORF7a-CFSTQFAFACPDGVKHHVYQL58fs

GGGCAATTCACCATTTTCATCCTCTAGCTGATAACAAATTTGCACTGACTT  
gct tta gca ctc aat ttg ctt ttg ctt gtc ctg acg gcg taa aac  
CGTGCCAGATCAGTTTCACCTAAACTGTTTCATCAGACAAGAGGAAGTTCAA

27568 52 1 0 3 ORF7a-FSTQFAFACPDGVKHHVYQ59fs  
GCAATTCACCATTTTCATCCTCTAGCTGATAACAAATTTGCACTGACTTGC  
ttt agc act caa ttt gct ttt gct tgt cct gac ggc gta  
AGTTACGTGCCAGATCAGTTTCACCTAAACTGTTTCATCAGACAAGAGGAAG

27571 12 30 10 556 ORF7a-STQF60del  
ATTCACCATTTTCATCCTCTAGCTGATAACAAATTTGCACTGACTTGCTTT  
agc act caa  
GCTTTTGCTTGTCCTGACGGCGTAAAACACGTCTATCAGTTACGTGCCAGA

27555 69 14 1 61 ORF7a-FALTQFSTQFAFACPDGVKHHVYQ54del  
GGAACATACGAGGGGCAATTCACCATTTTCATCCTCTAGCTGATAACAAATT  
tgc act gac ttg ctt tag cac tca att tgc ttt tgc ttg tcc tga cgg cgt a  
ACGTGCCAGATCAGTTTCACCTAAACTGTTTCATCAGACAAGAGGAAGTTCA

GGAACATACGAGGGGCAATTCACCATTTTCATCCTCTAGCTGATAACAAATT  
tgc act gac ttg ctt tag cac tca att tgc ttt tgc ttg tcc tga cgg cgt aaa aca cgt cta tca gtt  
AACTGTTTCATCAGACAAGAGGAAGTTCAAGAAGTTTACTCTCCAATTTTTC

ATTCACCATTTTCATCCTCTAGCTGATAACAAATTTGCACTGACTTGCTTT  
agc act caa ttt  
TTGCTTGTCCTGACGGCGTAAAACACGTCTATCAGTTACGTGCCAGATCAG

ACCATTTTCATCCTCTAGCTGATAACAAATTTGCACTGACTTGCTTTAGCA  
ctc aat ttg ctt ttg ctt  
GACGGCGTAAAACACGTCTATCAGTTACGTGCCAGATCAGTTTCACCTAAA

GGAACATACGAGGGGCAATTCACCATTTTCATCCTCTAGCTGATAACAAATT  
tgc act gac ttg ctt tag cac tca att tgc ttt tgc ttg  
AAACACGTCTATCAGTTACGTGCCAGATCAGTTTCACCTAAACTGTTTCATC

27571 18 25 0 50 ORF7a-STQFAF60del  
ATTCACCATTTTCATCCTCTAGCTGATAACAAATTTGCACTGACTTGCTTT  
agc act caa ttt gc  
GCTTGTCCTGACGGCGTAAAACACGTCTATCAGTTACGTGCCAGATCAGTT

CACCATTTTCATCCTCTAGCTGATAACAAATTTGCACTGACTTGCTTTAGC  
act caa ttt gct t  
TTGTCCTGACGGCGTAAAACACGTCTATCAGTTACGTGCCAGATCAGTTTC

TACGAGGGGCAATTCACCATTTTCATCCTCTAGCTGATAACAAATTTGCACT  
gac ttg ctt tag  
CAATTTGCTTTTGCTTGTCCTGACGGCGTAAAACACGTCTATCAGTTACGT

GGGCAATTCACCATTTTCATCCTCTAGCTGATAACAAATTTGCACTGACTT  
gct tta gca ctc aat ttg ctt  
TCCTGACGGCGTAAAACACGTCTATCAGTTACGTGCCAGATCAGTTTCACC

TGGAACATACGAGGGGCAATTCACCATTTTCATCCTCTAGCTGATAACAAAT  
ttg cac tga ctt gct tta gca ctc aat ttg ctt ttg ctt gtc ctg acg gcg taa aac acg tct atc agt

AAACTGTTTCATCAGACAAGAGGAAGTTCAAGAACTTTACTCTCCAATTTTT

27555 51 1 0 39 ORF7a-FALTCFSTQFAFACPDGV54L  
GGAACATACGAGGGCAATTCACCATTTCATCCTCTAGCTGATAACAAATT  
tgc act gac ttg ctt tag cac tca att tgc ttt tgc ttg  
AAAACACGTCTATCAGTTACGTGCCAGATCAGTTTCACCTAAACTGTTTCAT

27555 24 21 0 36 ORF7a-FALTCFSTQ54L  
GGAACATACGAGGGCAATTCACCATTTCATCCTCTAGCTGATAACAAATT  
tgc act gac ttg ctt tag  
ATTTGCTTTTGCTTGTCCTGACGGCGTAAAACACGTCTATCAGTTACGTGC

AATTCACCATTTCATCCTCTAGCTGATAACAAATTTGCACTGACTTGCTT  
tag cac tca att tgc  
GCTTGTCCTGACGGCGTAAAACACGTCTATCAGTTACGTGCCAGATCAGTT

27556 51 1 0 32 ORF7a-ALTCFSTQFAFACPDGV55del  
GAACATACGAGGGCAATTCACCATTTCATCCTCTAGCTGATAACAAATTT  
gca ctg act tgc ttt agc act caa ttt gct ttt gct tgc  
AAACACGTCTATCAGTTACGTGCCAGATCAGTTTCACCTAAACTGTTTCATC

27570 9 6 0 24 ORF7a-FSTQ59L  
AATTCACCATTTCATCCTCTAGCTGATAACAAATTTGCACTGACTTGCTT  
tag cac t  
ATTTGCTTTTGCTTGTCCTGACGGCGTAAAACACGTCTATCAGTTACGTGC

GAACATACGAGGGCAATTCACCATTTCATCCTCTAGCTGATAACAAATTT  
gca ctg act tgc ttt agc act caa ttt gct ttt gct tgc cct gac ggc gta aaa cac gtc tat c  
CACCTAAACTGTTTCATCAGACAAGAGGAAGTTCAAGAACTTTACTCTCCA

TTCACCATTTCATCCTCTAGCTGATAACAAATTTGCACTGACTTGCTTTA  
gca ctc aat ttg ctt ttg ctt gtc ctg acg gcg taa aac a  
CGTGCCAGATCAGTTTCACCTAAACTGTTTCATCAGACAAGAGGAAGTTCAA

GGAACATACGAGGGCAATTCACCATTTCATCCTCTAGCTGATAACAAATT  
tgc act gac ttg ctt tag cac tca att tgc ttt tgc ttg tcc tga cgg cgt aaa aca cgt ct  
GTTTCACCTAAACTGTTTCATCAGACAAGAGGAAGTTCAAGAACTTTACTCT

TTCACCATTTCATCCTCTAGCTGATAACAAATTTGCACTGACTTGCTTTA  
gca ctc aat ttg ctt ttg ctt gtc ctg acg gcg taa aac acg tct atc agt tac  
CCTAAACTGTTTCATCAGACAAGAGGAAGTTCAAGAACTTTACTCTCCAATT

27558 27 6 0 11 ORF7a-LTCFSTQFA56del  
ACATACGAGGGCAATTCACCATTTCATCCTCTAGCTGATAACAAATTTGC  
act gac ttg ctt tag cac tca  
TTTTGCTTGTCCTGACGGCGTAAAACACGTCTATCAGTTACGTGCCAGATC

TTCACCATTTCATCCTCTAGCTGATAACAAATTTGCACTGACTTGCTTTA  
gca ctc  
ATTTGCTTTTGCTTGTCCTGACGGCGTAAAACACGTCTATCAGTTACGTGC

AATTCACCATTTCATCCTCTAGCTGATAACAAATTTGCACTGACTTGCTT  
tag cac tca att tgc ttt tgc ttg tcc tga cgg cgt aaa aca  
CGTGCCAGATCAGTTTCACCTAAACTGTTTCATCAGACAAGAGGAAGTTCAA



27556 63 2 0 10 ORF7a-ALTCFSTQFAFACPDGVKHHVY55del  
GAACATACGAGGGCAATTCACCATTTTCATCCTCTAGCTGATAACAAATTT  
gca ctg act tgc ttt agc act caa ttt gct ttt gct tgt cct gac ggc  
CAGTTACGTGCCAGATCAGTTTCACCTAAACTGTTTCATCAGACAAGAGGAA

GGGCAATTCACCATTTTCATCCTCTAGCTGATAACAAATTTGCACTGACTT  
gct tta gca c  
ATTTGCTTTTGCTTGTCTGACGGCGTAAAACACGTCTATCAGTTACGTGC

27560 84 5 0 9 ORF7a-LTCFSTQFAFACPDGVKHHVYQLRARSVS56del  
ATACGAGGGCAATTCACCATTTTCATCCTCTAGCTGATAACAAATTTGCAC  
tga ctt gct tta gca ctc aat ttg ctt ttg ctt gtc ctg acg gcg taa aac acg tct atc agt  
CTAAACTGTTTCATCAGACAAGAGGAAGTTCAAGAACTTTACTCTCCAATTT

TTCACCATTTTCATCCTCTAGCTGATAACAAATTTGCACTGACTTGCTTTA  
gca ctc  
TTTGCTTTTGCTTGTCTGACGGCGTAAAACACGTCTATCAGTTACGTGCC

GGGCAATTCACCATTTTCATCCTCTAGCTGATAACAAATTTGCACTGACTT  
gct tta gca ctc aat ttg ctt ttg ctt gtc ctg acg gcg taa aac acg t  
AGATCAGTTTCACCTAAACTGTTTCATCAGACAAGAGGAAGTTCAAGAACTT

ATTCACCATTTTCATCCTCTAGCTGATAACAAATTTGCACTGACTTGCTTT  
agc act caa  
TGCTTTTGCTTGTCTGACGGCGTAAAACACGTCTATCAGTTACGTGCCAG

27567 27 6 0 7 ORF7a-FSTQFAFAC59del  
GGCAATTCACCATTTTCATCCTCTAGCTGATAACAAATTTGCACTGACTTG  
ctt tag cac tca att tgc ttt  
TCCTGACGGCGTAAAACACGTCTATCAGTTACGTGCCAGATCAGTTTCACC

27573 60 4 0 7 ORF7a-STQFAFACPDGVKHHVYQLRA60del  
TCACCATTTTCATCCTCTAGCTGATAACAAATTTGCACTGACTTGCTTTAG  
cac tca att tgc ttt tgc ttg tcc tga cgg cgt aaa aca cgt cta  
ATCAGTTTCACCTAAACTGTTTCATCAGACAAGAGGAAGTTCAAGAACTTTA

27574 30 1 0 7 ORF7a-TQFAFACPDG61del  
CACCATTTTCATCCTCTAGCTGATAACAAATTTGCACTGACTTGCTTTAGC  
act caa ttt gct ttt gct tgt cc  
GTAAAACACGTCTATCAGTTACGTGCCAGATCAGTTTCACCTAAACTGTTC

TCACCATTTTCATCCTCTAGCTGATAACAAATTTGCACTGACTTGCTTTAG  
cac tca att tgc ttt tgc ttg tcc tga cgg cgt aaa a  
TTACGTGCCAGATCAGTTTCACCTAAACTGTTTCATCAGACAAGAGGAAGTT

27556 84 2 0 6 ORF7a-ALTCFSTQFAFACPDGVKHHVYQLRARSV55del  
GAACATACGAGGGCAATTCACCATTTTCATCCTCTAGCTGATAACAAATTT  
gca ctg act tgc ttt agc act caa ttt gct ttt gct tgt cct gac ggc gta aaa cac gtc tat  
TCACCTAAACTGTTTCATCAGACAAGAGGAAGTTCAAGAACTTTACTCTCCA

AATTCACCATTTTCATCCTCTAGCTGATAACAAATTTGCACTGACTTGCTT  
tag cac tca att tgc ttt tgc ttg tcc tga cgg cgt aaa aca cgt cta tca gtt  
CACCTAAACTGTTTCATCAGACAAGAGGAAGTTCAAGAACTTTACTCTCCAA

TTCACCATTTTCATCCTCTAGCTGATAACAAATTTGCACTGACTTGCTTTA  
gca ctc aa  
TGCTTTTGCTTGTCTGACGGCGTAAAACACGTCTATCAGTTACGTGCCAG

TCTTCTGGAACATACGAGGGCAATTCACCATTTTCATCCTCTAGCTGATAA  
caa att tgc act gac ttg ctt tag  
TTTGCTTTTGCTTGTCTGACGGCGTAAAACACGTCTATCAGTTACGTGCC

GAACATACGAGGGCAATTCACCATTTTCATCCTCTAGCTGATAACAAATTT  
gca ctg act tgc ttt agc act caa ttt gct ttt gct tgt cct gac ggc  
AGTTACGTGCCAGATCAGTTTTCACCTAAACTGTTTCATCAGACAAGAGGAAG

GGGCAATTCACCATTTTCATCCTCTAGCTGATAACAAATTTGCACTGACTT  
gct tta gca ctc aat ttg ctt ttg ctt gtc ctg acg gcg taa aac acg  
CAGATCAGTTTTCACCTAAACTGTTTCATCAGACAAGAGGAAGTTCAAGAACT

ATTCACCATTTTCATCCTCTAGCTGATAACAAATTTGCACTGACTTGCTTT  
agc act ca  
TTGCTTTTGCTTGTCTGACGGCGTAAAACACGTCTATCAGTTACGTGCCA

GAACATACGAGGGCAATTCACCATTTTCATCCTCTAGCTGATAACAAATTT  
gca ctg act tgc ttt agc  
ATTTGCTTTTGCTTGTCTGACGGCGTAAAACACGTCTATCAGTTACGTGC

GAACATACGAGGGCAATTCACCATTTTCATCCTCTAGCTGATAACAAATTT  
gca ctg act tgc ttt agc act caa  
TGCTTGTCTGACGGCGTAAAACACGTCTATCAGTTACGTGCCAGATCAGT

GGAACATACGAGGGCAATTCACCATTTTCATCCTCTAGCTGATAACAAATT  
tgc act gac ttg ctt tag cac tca att tgc ttt tgc ttg tcc tga cgg cgt aa  
CGTGCCAGATCAGTTTTCACCTAAACTGTTTCATCAGACAAGAGGAAGTTCAA

27574 9 1 0 4 ORF7a-TQF61del  
CACCATTTTCATCCTCTAGCTGATAACAAATTTGCACTGACTTGCTTTAGC  
act caa t  
GCTTTTGCTTGTCTGACGGCGTAAAACACGTCTATCAGTTACGTGCCAGA

CATACGAGGGCAATTCACCATTTTCATCCTCTAGCTGATAACAAATTTGCA  
ctg act tgc ttt agc act caa ttt gct ttt gct tgt cct gac ggc gta aaa cac gtc tat cag tta  
AACTGTTTCATCAGACAAGAGGAAGTTCAAGAAGTTACTCTCCAATTTTTC

GGGCAATTCACCATTTTCATCCTCTAGCTGATAACAAATTTGCACTGACTT  
gct tta gca ctc  
TGCTTTTGCTTGTCTGACGGCGTAAAACACGTCTATCAGTTACGTGCCAG

CTGGAACATACGAGGGCAATTCACCATTTTCATCCTCTAGCTGATAACAAA  
ttt gca ctg act tgc ttt agc act caa ttt gct ttt gct tgt  
ACACGTCTATCAGTTACGTGCCAGATCAGTTTTCACCTAAACTGTTTCATCAG

27572 15 3 0 3 ORF7a-STQFAF60I  
TTCACCATTTTCATCCTCTAGCTGATAACAAATTTGCACTGACTTGCTTTA  
gca ctc aat ttg  
TTGCTTGTCTGACGGCGTAAAACACGTCTATCAGTTACGTGCCAGATCAG

27565 66 3 0 3 ORF7a-CFSTQFAFACPDGVKHVYQLRA58del  
AGGGCAATTCACCATTTTCATCCTCTAGCTGATAACAAATTTGCACTGACT  
tgc ttt agc act caa ttt gct ttt gct tgt cct gac ggc gta aaa cac gt  
AGATCAGTTTCACCTAAACTGTTTCATCAGACAAGAGGAAGTTCAAGAACTT

27553 96 3 0 3 ORF7a-FALTQFAFACPDGVKHVYQLRARSVSPK54del  
CTGGAACATACGAGGGCAATTCACCATTTTCATCCTCTAGCTGATAACAAA  
ttt gca ctg act tgc ttt agc act caa ttt gct ttt gct tgt cct gac ggc gta aaa cac gtc tat cag tta  
CTGTTTCATCAGACAAGAGGAAGTTCAAGAACTTTACTCTCCAATTTTCTT

CTCTTCTGGAACATACGAGGGCAATTCACCATTTTCATCCTCTAGCTGATA  
aca aat  
GCACTGACTTGCTTTAGCACTCAATTTGCTTTTGCTTGTCTGACGGCGTA

GGGCAATTCACCATTTTCATCCTCTAGCTGATAACAAATTTGCACTGACTT  
gct tta  
ACTCAATTTGCTTTTGCTTGTCTGACGGCGTAAACACGTCTATCAGTTA

27566 51 2 0 3 ORF7a-CFSTQFAFACPDGVKHV58del  
GGGCAATTCACCATTTTCATCCTCTAGCTGATAACAAATTTGCACTGACTT  
gct tta gca ctc aat ttg ctt ttg ctt gtc ctg acg ggc  
ATCAGTTACGTGCCAGATCAGTTTCACCTAAACTGTTTCATCAGACAAGAGG

CCATTTTCATCCTCTAGCTGATAACAAATTTGCACTGACTTGCTTTAGCAC  
tca att  
GCTTTTGCTTGTCTGACGGCGTAAACACGTCTATCAGTTACGTGCCAGA

CCATTTTCATCCTCTAGCTGATAACAAATTTGCACTGACTTGCTTTAGCAC  
tca att tgc ttt tgc ttg tcc tga cgg cgt aaa aca cg  
GTGCCAGATCAGTTTCACCTAAACTGTTTCATCAGACAAGAGGAAGTTCAAG

GGAACATACGAGGGCAATTCACCATTTTCATCCTCTAGCTGATAACAAATT  
tgc act gac ttg ctt tag cac tca att tgc ttt tgc ttg tcc tga cgg cgt aaa aca cgt cta tc  
CACCTAAACTGTTTCATCAGACAAGAGGAAGTTCAAGAACTTTACTCTCCAA

27555 87 2 0 3 ORF7a-FALTQFAFACPDGVKHVYQLRARSVS54L  
GGAACATACGAGGGCAATTCACCATTTTCATCCTCTAGCTGATAACAAATT  
tgc act gac ttg ctt tag cac tca att tgc ttt tgc ttg tcc tga cgg cgt aaa aca cgt cta tca  
ACCTAAACTGTTTCATCAGACAAGAGGAAGTTCAAGAACTTTACTCTCCAAT

27548 108 1 0 3 ORF7a-NKFALTQFAFACPDGVKHVYQLRARSVSPKLF52del  
CTCTTCTGGAACATACGAGGGCAATTCACCATTTTCATCCTCTAGCTGATA  
aca aat ttg cac tga ctt gct tta gca ctc aat ttg ctt ttg ctt gtc ctg acg ggc taa aac acg tct atc agt tac gtg  
TCAGACAAGAGGAAGTTCAAGAACTTTACTCTCCAATTTTCTTATTGTTG

27542 75 1 0 3 ORF7a-ADNKFALTQFAFACPDGVKHVY50D  
ACCTTGCTCTTCTGGAACATACGAGGGCAATTCACCATTTTCATCCTCTAG  
ctg ata aca aat ttg cac tga ctt gct tta gca ctc aat ttg ctt ttg ctt gtc ctg  
ATCAGTTACGTGCCAGATCAGTTTCACCTAAACTGTTTCATCAGACAAGAGG

27572 48 1 0 3 ORF7a-STQFAFACPDGVKHVYQ60K  
TTCACCATTTTCATCCTCTAGCTGATAACAAATTTGCACTGACTTGCTTTA  
gca ctc aat ttg ctt ttg ctt gtc ctg acg ggc taa

AGTTACGTGCCAGATCAGTTTCACCTAAACTGTTTCATCAGACAAGAGGAAG

GAACATACGAGGGCAATTCACCATTTTCATCCTCTAGCTGATAACAAATTT  
gca ctg act tgc ttt agc act caa ttt gct ttt  
ACGGCGTAAAACACGTCTATCAGTTACGTGCCAGATCAGTTTCACCTAAAC

GGGCAATTCACCATTTTCATCCTCTAGCTGATAACAAATTTGCACTGACTT  
gct tta gca ctc aat ttg ctt ttg ctt gtc ctg acg gcg taa aac  
CGTGCCAGATCAGTTTCACCTAAACTGTTTCATCAGACAAGAGGAAGTTCAA
